# Supplementary material for: YAP and β-Catenin Cooperate to Drive Oncogenesis in Basal Breast Cancer
Source: Oxford University Press journal article supplement (doi:10.1158/0008-5472.can-20-2801), 2021-02-11
Supplement: 00085472can202801-sup-249632_2_supp_6883593_qnr75t.xlsx [file 00085472can202801-sup-249632_2_supp_6883593_qnr75t.xlsx]

## Sheet: NanoString Log2 Counts
Probe Name	Annotation	Accession #	NS Probe ID	Class Name	Analyte Type	% Samples above Threshold	Avg Count	20200226_30102470320821-01_Control1_01.RCC	20200226_30102470320821-01_Control2_02.RCC	20200226_30102470320821-01_Control3_03.RCC	20200226_30102470320821-01_Knock-out1_04.RCC	20200226_30102470320821-01_Knock-out2_05.RCC	20200226_30102470320821-01_Knock-out3_06.RCC
								Control	Control	Control	YAP KO	YAP KO	YAP KO
Abl1		NM_009594.4	NM_009594.4:1378	Endogenous	mRNA	100	164.3	7.51	7.35	7.45	7.06	7.22	7.51
Acvr1b		NM_007395.3	NM_007395.3:1295	Endogenous	mRNA	100	317.91	8.41	8.43	8.45	8.08	8.19	8.27
Acvr1c		NM_001033369.3	NM_001033369.3:128	Endogenous	mRNA	100	24.51	5.28	4.3	3.59	4.22	5.27	4.27
Acvr2a		NM_007396.4	NM_007396.4:4680	Endogenous	mRNA	100	168.02	7.49	7.46	7.5	7.34	7.34	7.21
Akt1		NM_001165894.1	NM_001165894.1:898	Endogenous	mRNA	100	495.95	8.88	8.77	9.12	9.07	8.9	8.95
Akt2		NM_001110208.1	NM_001110208.1:2504	Endogenous	mRNA	100	115.87	7	6.96	7.07	6.65	6.64	6.77
Akt3		NM_011785.3	NM_011785.3:4625	Endogenous	mRNA	100	83.82	6.47	6.64	6.36	6.24	6.29	6.28
Alk		NM_007439.2	NM_007439.2:2218	Endogenous	mRNA	100	4.95	2.73	0.13	2.7	2.8	1.81	2.33
Alkbh2		NM_175016.2	NM_175016.2:630	Endogenous	mRNA	100	62.15	5.59	6.06	6.17	6.1	5.93	5.81
Alkbh3		NM_026944.1	NM_026944.1:354	Endogenous	mRNA	100	93.11	6.61	6.32	6	6.56	6.86	6.75
Amer1		NM_175179.4	NM_175179.4:4120	Endogenous	mRNA	100	108.03	6.88	6.45	6.46	6.89	6.78	6.97
Amh		NM_007445.2	NM_007445.2:355	Endogenous	mRNA	100	4.53	2.5	1.72	0.89	2.8	1.81	2.55
Angpt1		NM_009640.3	NM_009640.3:1350	Endogenous	mRNA	100	73	5.85	5.69	6.06	6.41	6.75	6.12
Angpt2		NM_007426.3	NM_007426.3:2020	Endogenous	mRNA	100	99.56	6.66	6.72	6.98	6.47	6.6	6.32
Ankrd1		NM_013468.3	NM_013468.3:1030	Endogenous	mRNA	100	38.74	5.47	5.69	5.1	5.08	4.69	5.42
Apc		NM_007462.3	NM_007462.3:645	Endogenous	mRNA	100	540.51	8.92	8.85	8.97	9.22	9.19	9.27
Aph1b		NM_177583.4	NM_177583.4:3320	Endogenous	mRNA	100	44.03	5.44	6.09	5.5	4.97	5.23	5.27
Ar		NM_013476.3	NM_013476.3:2215	Endogenous	mRNA	100	32.32	5.56	5.26	4.59	4.03	5.03	5.14
Areg		NM_009704.3	NM_009704.3:698	Endogenous	mRNA	100	51.73	5.47	6.72	5.89	4.97	4.98	5.27
Arid1a		NM_001080819.1	NM_001080819.1:7690	Endogenous	mRNA	100	392.36	8.56	8.89	8.78	8.35	8.54	8.52
Arid1b		NM_001085355.1	NM_001085355.1:2848	Endogenous	mRNA	100	135.95	7.35	7.3	7.3	6.47	6.8	7.1
Arid2		NM_175251.2	NM_175251.2:8010	Endogenous	mRNA	100	11.6	2.73	3.59	3.06	3.8	3.93	3.75
Arnt2		NM_007488.2	NM_007488.2:5710	Endogenous	mRNA	100	37.24	4.92	4.89	4.64	5.61	5.65	5.3
Asxl1		NM_001039939.1	NM_001039939.1:5760	Endogenous	mRNA	100	188.7	7.38	7.67	7.36	7.7	7.49	7.71
Atm		NM_007499.2	NM_007499.2:5543	Endogenous	mRNA	100	127.37	6.78	6.65	6.81	7.45	7.11	7.01
Atr		NM_019864.1	NM_019864.1:4392	Endogenous	mRNA	100	123.88	6.78	6.96	6.72	7.48	6.87	6.76
Atrx		NM_009530.2	NM_009530.2:980	Endogenous	mRNA	100	763.06	9.43	9.53	9.52	9.91	9.45	9.57
Axin1		NM_001159598.1	NM_001159598.1:2806	Endogenous	mRNA	100	79.95	6.13	6.57	6.63	6.15	6.44	5.85
Axin2		NM_015732.4	NM_015732.4:1120	Endogenous	mRNA	100	217.58	7.81	8.48	8.04	7.16	7.15	7.46
B2m		NM_009735.3	NM_009735.3:177	Endogenous	mRNA	100	9622.63	13.77	12.86	13.24	12.72	13.09	13.45
Bad		NM_007522.3	NM_007522.3:1146	Endogenous	mRNA	100	225.98	7.74	7.77	7.96	7.9	7.83	7.71
Baiap3		NM_001163270.1	NM_001163270.1:4004	Endogenous	mRNA	100	7.56	2.92	3.3	3.21	2.22	3.03	2.55
Bambi		NM_026505.2	NM_026505.2:684	Endogenous	mRNA	100	272.2	8.06	8.94	8.66	7.51	6.64	7.53
Bap1		NM_027088.2	NM_027088.2:3068	Endogenous	mRNA	100	30.76	5.01	4.94	5.14	4.39	5.18	4.88
Bax		NM_007527.3	NM_007527.3:735	Endogenous	mRNA	100	165.88	7.36	7.33	7.6	7.36	7.25	7.32
Bcl2		NM_009741.3	NM_009741.3:1844	Endogenous	mRNA	100	38.47	5.41	4.72	5.06	5.08	5.4	5.72
Bcl2a1a		NM_009742.3	NM_009742.3:175	Endogenous	mRNA	100	953.29	9.97	9.72	10.12	9.78	9.74	10
Bcl2l1		NM_009743.4	NM_009743.4:200	Endogenous	mRNA	100	195.1	7.55	7.81	7.52	7.33	7.58	7.8
Bcor		NM_029510.3	NM_029510.3:6424	Endogenous	mRNA	100	62.33	6.07	6.09	6	5.89	5.65	6.03
Bdnf		NM_007540.4	NM_007540.4:3260	Endogenous	mRNA	100	40.03	5.09	5.52	5.53	5.39	5.36	4.96
Bid		NM_007544.3	NM_007544.3:1307	Endogenous	mRNA	100	193.67	7.69	7.67	7.95	7.73	6.84	7.48
Birc3		NM_007464.3	NM_007464.3:425	Endogenous	mRNA	100	223.66	8.06	8.01	7.81	7.52	7.58	7.76
Birc5		NM_009689.2	NM_009689.2:237	Endogenous	mRNA	100	218.23	7.47	7.55	7.71	8.33	7.39	7.94
Birc7		NM_001163247.1	NM_001163247.1:82	Endogenous	mRNA	100	17.8	3.73	4.38	4.06	4.31	4.23	4.14
Blm		NM_007550.3	NM_007550.3:4135	Endogenous	mRNA	100	48.11	5.05	5.72	5.59	5.71	5.58	5.77
Bmp2		NM_007553.2	NM_007553.2:885	Endogenous	mRNA	100	256.01	7.96	9.09	8.61	6.7	6.42	7.35
Bmp4		NM_007554.2	NM_007554.2:1500	Endogenous	mRNA	100	130.06	6.95	8.18	7.55	5.97	5.18	6.35
Bmp5		NM_007555.3	NM_007555.3:165	Endogenous	mRNA	100	6.97	2.24	2.72	3.59	3.22	2.55	1.75
Bmp6		NM_007556.2	NM_007556.2:2265	Endogenous	mRNA	100	19.21	4.31	4.52	4.89	3.03	4.23	3.99
Bmp7		NM_007557.2	NM_007557.2:690	Endogenous	mRNA	100	194.03	7.56	8.66	8.15	6.59	5.9	7.05
Bmp8a		NM_001256019.1	NM_001256019.1:2084	Endogenous	mRNA	100	14.34	4.09	3.94	4.53	3.54	3.4	3.07
Bmpr1b		NM_007560.3	NM_007560.3:2750	Endogenous	mRNA	100	8.58	2.73	3.94	3.35	2.8	3.03	2.07
Bnip3		NM_009760.4	NM_009760.4:1108	Endogenous	mRNA	100	356.93	8.9	8.32	8	8.64	8.81	7.92
Braf		NM_139294.5	NM_139294.5:1102	Endogenous	mRNA	100	169.31	7.65	7.55	7.47	7.05	7.24	7.38
Brca1		NM_009764.3	NM_009764.3:2027	Endogenous	mRNA	100	56.11	5.35	5.59	5.7	6.31	5.98	5.75
Brca2		NM_009765.3	NM_009765.3:1684	Endogenous	mRNA	100	65.31	5.96	6.06	5.59	6.52	5.9	5.97
Brip1		NM_178309.2	NM_178309.2:2388	Endogenous	mRNA	100	16.2	3.62	3.94	4.21	4.74	3.55	3.65
Cacna1c		NM_001159535.1	NM_001159535.1:1000	Endogenous	mRNA	100	13.29	4.01	3.83	3.98	3.8	3.4	3.21
Cacna1d		NM_028981.2	NM_028981.2:2935	Endogenous	mRNA	100	55.14	6.03	5.62	6.21	5.8	5.27	5.58
Cacna1e		NM_009782.3	NM_009782.3:4650	Endogenous	mRNA	100	4.62	1.92	1.13	2.47	2.22	1.23	3.21
Cacna1g		NM_001112813.2	NM_001112813.2:930	Endogenous	mRNA	100	20.1	4.38	4.72	4.28	4.74	4.03	3.45
Cacna1h		NM_021415.4	NM_021415.4:3212	Endogenous	mRNA	100	10.96	3.09	3.83	3.47	3.92	2.55	3.45
Cacna2d1		XM_006535618.1	XM_006535618.1:50	Endogenous	mRNA	100	29.72	4.62	4.78	5.5	4.97	4.4	4.83
Cacna2d2		NM_020263.3	NM_020263.3:1402	Endogenous	mRNA	100	13.04	3.24	4.22	3.21	4.03	3.69	3.55
Cacna2d3		NM_009785.1	NM_009785.1:696	Endogenous	mRNA	100	181.28	7.58	7.46	7.55	7.59	7.24	7.57
Cacna2d4		NM_001033382.2	NM_001033382.2:3672	Endogenous	mRNA	100	7	3.5	2.13	3.47	2.8	1.23	2.55
Cacnb2		NM_023116.3	NM_023116.3:735	Endogenous	mRNA	100	7.02	2.5	3.59	2.47	2.8	3.23	1.33
Cacnb3		NM_007581.2	NM_007581.2:2580	Endogenous	mRNA	100	179.45	7.58	7.77	7.45	7.47	7.26	7.35
Cacnb4		NM_146123.2	NM_146123.2:6510	Endogenous	mRNA	100	16.72	3.62	3.83	4.21	3.92	4.55	4.07
Cacng1		NM_007582.2	NM_007582.2:428	Endogenous	mRNA	100	6.28	1.5	2.94	2.21	2.8	3.4	2.33
Cacng4		NM_019431.2	NM_019431.2:524	Endogenous	mRNA	100	20.23	4.56	3.94	3.89	4.8	4.62	3.92
Cacng6		NM_133183.1	NM_133183.1:158	Endogenous	mRNA	100	5.94	2.5	2.45	2.21	2.22	3.23	2.55
Calml3		NM_027416.3	NM_027416.3:632	Endogenous	mRNA	100	1483.13	10.45	11.44	10.6	9.75	10.12	10.21
Camk2b		NM_001174053.1	NM_001174053.1:2825	Endogenous	mRNA	100	8.39	2.5	3.59	2.47	3.22	3.23	3.07
Capn2		NM_009794.3	NM_009794.3:2124	Endogenous	mRNA	100	817.41	9.96	9.95	10	9.08	9.33	9.48
Card11		NM_175362.2	NM_175362.2:545	Endogenous	mRNA	100	18.69	4.09	4.38	4.35	4.13	4.03	4.33
Casp12		NM_009808.4	NM_009808.4:766	Endogenous	mRNA	100	182.61	7.81	7.53	7.7	7.5	7.05	7.35
Casp3		NM_009810.2	NM_009810.2:630	Endogenous	mRNA	100	193	7.56	7.14	7.37	7.99	7.67	7.68
Casp7		NM_007611.2	NM_007611.2:1468	Endogenous	mRNA	100	363.6	8.41	8.04	8.42	8.7	8.63	8.72
Casp8		NM_009812.2	NM_009812.2:1463	Endogenous	mRNA	100	278.14	8.15	8.27	8.29	8.09	7.83	8.04
Casp9		NM_015733.4	NM_015733.4:1675	Endogenous	mRNA	100	22.21	4.73	4.52	4.75	4.31	4.23	4.21
Cavin2		NM_138741.1	NM_138741.1:158	Endogenous	mRNA	100	313.32	8.81	7.78	7.95	8.23	8.76	7.85
Cbl		NM_007619.2	NM_007619.2:3820	Endogenous	mRNA	100	514.72	9.07	9.27	9.27	8.61	8.82	8.9
Cblc		NM_023224.5	NM_023224.5:834	Endogenous	mRNA	100	121.66	6.65	6.87	7.02	7.09	6.97	6.93
Ccna1		NM_007628.3	NM_007628.3:375	Endogenous	mRNA	83.33	4.59	0	1.13	2.7	2.8	2.55	2.33
Ccna2		NM_009828.2	NM_009828.2:1280	Endogenous	mRNA	100	221.58	7.56	7.65	7.56	8.34	7.46	7.97
Ccnb1		NM_172301.3	NM_172301.3:2136	Endogenous	mRNA	100	7.77	0.92	2.72	3.21	3.22	2.81	3.65
Ccnb3		NM_183015.3	NM_183015.3:3324	Endogenous	mRNA	83.33	3.04	1.92	0.13	0	1.22	2.55	2.07
Ccnd1		NM_007631.1	NM_007631.1:2000	Endogenous	mRNA	100	745.31	9.59	9.69	9.73	9.21	9.17	9.73
Ccnd2		NM_009829.3	NM_009829.3:1665	Endogenous	mRNA	100	453.61	9.3	9.44	9.12	7.93	7.93	8.45
Ccnd3		NM_007632.2	NM_007632.2:1311	Endogenous	mRNA	100	100.63	6.63	6.78	6.78	6.65	6.75	6.27
Ccne1		NM_007633.2	NM_007633.2:885	Endogenous	mRNA	100	29.9	4.5	5.09	4.93	4.97	5.08	4.75
Ccne2		NM_001037134.1	NM_001037134.1:613	Endogenous	mRNA	100	174.09	7.01	7.37	7.47	7.95	7.45	7.25
Ccno		NM_001081062.1	NM_001081062.1:1365	Endogenous	mRNA	100	12.61	4.01	3.13	3.7	4.22	3.55	2.92
Ccr7		NM_007719.2	NM_007719.2:755	Endogenous	mRNA	100	32.81	5.2	4.72	4.75	5.17	5.31	4.96
Cd14		NM_009841.3	NM_009841.3:235	Endogenous	mRNA	100	792.9	9.48	9.48	9.72	9.55	9.76	9.77
Cd19		NM_009844.2	NM_009844.2:1697	Endogenous	mRNA	100	4.94	3.5	0.13	0.89	2.54	2.81	1.33
Cd40		NM_011611.2	NM_011611.2:1425	Endogenous	mRNA	100	47.04	5.87	5.78	6.06	5.03	5.03	5.21
Cdc14a		NM_001173553.1	NM_001173553.1:970	Endogenous	mRNA	100	128.19	7.17	7.42	7.1	6.65	6.67	6.85
Cdc14b		NM_172587.3	NM_172587.3:612	Endogenous	mRNA	100	20.54	3.92	4.59	4.06	4.31	4.31	4.79
Cdc25a		NM_007658.3	NM_007658.3:855	Endogenous	mRNA	100	141.59	7.18	7.1	7.13	7.22	7.18	7.07
Cdc25b		NM_001111075.4	NM_001111075.4:576	Endogenous	mRNA	100	79.08	6.65	6.57	6.36	6.13	5.75	6.19
Cdc25c		NM_009860.2	NM_009860.2:42	Endogenous	mRNA	100	24.15	3.73	4.99	4.28	5.26	3.93	4.75
Cdc6		NM_011799.2	NM_011799.2:2955	Endogenous	mRNA	100	11.83	3.62	3.72	3.47	3.03	3.69	3.75
Cdc7		NM_001271566.1	NM_001271566.1:2804	Endogenous	mRNA	100	42.71	5.38	4.78	5.44	5.77	5.4	5.55
Cdh1		NM_009864.2	NM_009864.2:1610	Endogenous	mRNA	100	940.53	9.69	10.02	10.1	9.58	9.74	10.05
Cdk2		NM_016756.4	NM_016756.4:1468	Endogenous	mRNA	100	161.98	7.3	7.35	7.22	7.15	7.43	7.55
Cdk4		NM_009870.3	NM_009870.3:494	Endogenous	mRNA	100	584.7	9.22	9.24	9.3	9.1	8.98	9.29
Cdk6		NM_009873.2	NM_009873.2:820	Endogenous	mRNA	100	93.95	6.56	6.82	6.78	6	6.34	6.66
Cdkn1a		NM_007669.4	NM_007669.4:1670	Endogenous	mRNA	100	402.7	8.74	9.49	9.2	7.44	7.7	8.23
Cdkn1b		NM_009875.4	NM_009875.4:2016	Endogenous	mRNA	100	850.1	9.64	9.79	9.81	9.92	9.44	9.74
Cdkn1c		NM_009876.3	NM_009876.3:1240	Endogenous	mRNA	100	87.13	7.36	6.13	5.56	6.26	6.91	5.45
Cdkn2a		NM_001040654.1	NM_001040654.1:566	Endogenous	mRNA	100	27.59	5.17	5.56	5.1	3.8	4.13	4.07
Cdkn2b		NM_007670.4	NM_007670.4:1040	Endogenous	mRNA	100	226.1	8.26	8.51	8.34	6.92	6.13	7.4
Cdkn2c		NM_007671.2	NM_007671.2:265	Endogenous	mRNA	100	284.58	8.62	7.72	7.5	8.27	8.52	7.94
Cdkn2d		NM_009878.2	NM_009878.2:155	Endogenous	mRNA	100	49.95	6.01	5.78	5.82	5.8	5.08	5.1
Cebpa		NM_007678.3	NM_007678.3:1968	Endogenous	mRNA	100	1269.25	10.51	10.19	9.96	10.18	10.64	10.28
Cebpe		NM_207131.1	NM_207131.1:196	Endogenous	mRNA	100	13.17	2.92	4.04	4.06	4.03	3.69	3.21
Chad		NM_007689.4	NM_007689.4:951	Endogenous	mRNA	100	13.56	3.38	3.83	3.35	4.31	4.13	3.21
Chek1		NM_007691.4	NM_007691.4:355	Endogenous	mRNA	100	95.84	6.24	6.2	6.52	6.88	6.64	6.88
Chek2		NM_016681.3	NM_016681.3:790	Endogenous	mRNA	100	67.49	5.65	5.56	5.41	6.71	6.44	6.21
Chuk		NM_001162410.1	NM_001162410.1:222	Endogenous	mRNA	100	437.89	8.88	8.69	8.54	9.04	8.75	8.69
Cic		NM_027882.3	NM_027882.3:5680	Endogenous	mRNA	100	172.52	7.49	7.62	7.68	7.33	6.98	7.38
Clcf1		NM_019952.3	NM_019952.3:385	Endogenous	mRNA	100	6.23	2.5	2.45	2.89	3.39	2.55	1.33
Cldn1		NM_016674.3	NM_016674.3:2355	Endogenous	mRNA	100	1018.07	10.05	10.48	10.23	9.61	9.29	9.97
Cntfr		NM_001146080.1	NM_001146080.1:427	Endogenous	mRNA	100	65.7	6.05	6.65	6.46	5.54	4.98	5.94
Col11a1		NM_007729.2	NM_007729.2:2644	Endogenous	mRNA	100	80.12	6.31	7.13	6.91	5.58	5.03	5.92
Col11a2		NM_009926.1	NM_009926.1:740	Endogenous	mRNA	100	7.78	2.92	2.72	3.35	3.22	2.23	3.07
Col1a1		NM_007742.3	NM_007742.3:215	Endogenous	mRNA	100	6223.26	12.65	13.25	13.34	11.62	11.56	12.17
Col1a2		NM_007743.2	NM_007743.2:4025	Endogenous	mRNA	100	2433.74	11.22	11.83	11.94	10.62	10.21	10.87
Col24a1		NM_027770.2	NM_027770.2:1184	Endogenous	mRNA	100	51.43	5.56	6.43	6.31	5.17	4.47	5.21
Col27a1		NM_025685.3	NM_025685.3:1148	Endogenous	mRNA	100	16.33	3.83	4.38	4.28	4.22	3.81	3.45
Col2a1		NM_001113515.2	NM_001113515.2:4346	Endogenous	mRNA	100	34.31	4.73	4.78	4.7	5.26	5.78	5.03
Col3a1		NM_009930.1	NM_009930.1:4370	Endogenous	mRNA	100	17555.2	14.27	14.4	14.58	13.44	13.57	13.98
Col4a3		NM_007734.2	NM_007734.2:7395	Endogenous	mRNA	100	7.1	2.5	2.72	2.7	3.54	2.23	2.92
Col4a4		NM_007735.2	NM_007735.2:5450	Endogenous	mRNA	100	5.18	1.5	2.72	1.47	2.54	2.23	3.07
Col4a5		NM_001163155.1	NM_001163155.1:5282	Endogenous	mRNA	100	75.28	6.01	5.65	5.62	6.66	6.55	6.54
Col4a6		NM_053185.2	NM_053185.2:6442	Endogenous	mRNA	100	168.04	6.36	6.34	6.9	8.05	7.72	7.97
Col5a1		NM_015734.2	NM_015734.2:6145	Endogenous	mRNA	100	233.9	7.92	8.37	8.62	7.46	6.6	7.35
Col5a2		NM_007737.2	NM_007737.2:4425	Endogenous	mRNA	100	1958.62	11.07	11.52	11.51	10.19	9.95	10.64
Col6a6		NM_001102607.1	NM_001102607.1:2192	Endogenous	mRNA	100	24.92	5.94	3.94	4.14	3.92	4.69	3.83
Comp		NM_016685.2	NM_016685.2:514	Endogenous	mRNA	100	11.8	5.05	0.13	3.7	3.92	1.81	2.33
Creb3l1		NM_011957.2	NM_011957.2:1780	Endogenous	mRNA	100	19.3	4.24	4.52	3.47	4.39	4.55	4.21
Creb3l3		NM_145365.3	NM_145365.3:1390	Endogenous	mRNA	100	10.65	3.38	3.13	3.35	3.68	3.55	3.33
Creb3l4		NM_030080.2	NM_030080.2:1088	Endogenous	mRNA	100	26.35	4.67	4.83	4.14	4.86	4.81	4.88
Creb5		NM_172728.2	NM_172728.2:2415	Endogenous	mRNA	100	44.82	5.92	5.69	5.31	4.86	5.47	5.45
Crebbp		NM_001025432.1	NM_001025432.1:3770	Endogenous	mRNA	100	671.99	9.49	9.5	9.45	9.09	9.36	9.42
Crlf2		NM_001164735.1	NM_001164735.1:263	Endogenous	mRNA	100	87.43	6.92	6.62	6.64	6	5.9	6.35
Csf1r		NM_001037859.2	NM_001037859.2:1038	Endogenous	mRNA	100	655.28	9.78	9.42	9.59	8.75	9.05	9.32
Csf2		NM_009969.4	NM_009969.4:732	Endogenous	mRNA	83.33	4.68	0	1.72	3.21	1.8	1.81	2.92
Csf2rb		NM_007780.4	NM_007780.4:4185	Endogenous	mRNA	100	161.01	7.71	7.27	7.43	7.03	7.26	7.18
Csf3		NM_009971.1	NM_009971.1:830	Endogenous	mRNA	100	16.84	4.5	3.83	4.84	3.39	3.03	4.07
Csf3r		NM_001252651.1	NM_001252651.1:1294	Endogenous	mRNA	100	144.72	7.43	7.37	7.82	7.08	5.93	6.75
Ctgf		NM_010217.2	NM_010217.2:2240	Endogenous	mRNA	100	3558.76	11.89	12.71	12.34	10.83	10.41	11.28
Ctnnb1		NM_007614.2	NM_007614.2:2975	Endogenous	mRNA	100	3820.1	11.9	12.23	12.17	11.7	11.48	11.77
Cul1		NM_012042.3	NM_012042.3:919	Endogenous	mRNA	100	666.28	9.33	9.3	9.34	9.62	9.34	9.32
Cxcl1		NM_008176.1	NM_008176.1:560	Endogenous	mRNA	100	69.46	6.07	6.9	6.84	5.13	4.4	5.9
Cxcl2		NM_009140.2	NM_009140.2:765	Endogenous	mRNA	100	39.67	5.13	4.52	5.38	5.8	5.51	5.21
Cxcl5		NM_009141.2	NM_009141.2:565	Endogenous	mRNA	100	90.78	7.15	6.9	7.45	5.22	4.75	5.47
Cxxc4		NM_001004367.4	NM_001004367.4:132	Endogenous	mRNA	100	6.72	2.24	2.72	2.21	3.03	3.69	1.75
Cyld		NM_001276279.1	NM_001276279.1:2200	Endogenous	mRNA	100	114.36	7.24	6.72	6.6	6.76	7.01	6.58
Cyr61		NM_010516.1	NM_010516.1:804	Endogenous	mRNA	100	330.24	8.47	9.12	9.09	7.34	6.62	8.06
Daxx		NM_007829.3	NM_007829.3:1215	Endogenous	mRNA	100	52.45	5.75	5.72	6.1	5.26	5.13	6.05
Ddb2		NM_028119.5	NM_028119.5:1428	Endogenous	mRNA	100	27.75	4.17	4.45	4.41	5.43	5.4	4.33
Ddit3		NM_007837.3	NM_007837.3:255	Endogenous	mRNA	100	64.01	6.05	5.91	6.21	5.71	6.06	6.01
Ddit4		NM_029083.2	NM_029083.2:70	Endogenous	mRNA	100	85.03	6.53	6.9	6.55	6.17	5.47	6.46
Dkk1		NM_010051.3	NM_010051.3:55	Endogenous	mRNA	100	9.34	3.24	3.45	1.89	3.39	3.4	3.45
Dkk2		NM_020265.4	NM_020265.4:3285	Endogenous	mRNA	100	131.41	7.27	8.01	7.42	6.1	5.18	6.64
Dkk4		NM_145592.2	NM_145592.2:252	Endogenous	mRNA	100	13.51	3.62	4.13	3.35	3.92	3.55	3.83
Dll1		NM_007865.3	NM_007865.3:1090	Endogenous	mRNA	100	33.34	4.96	4.89	5.56	4.8	5.08	4.92
Dll3		NM_007866.2	NM_007866.2:839	Endogenous	mRNA	100	4.5	0.92	2.72	0.89	3.03	1.81	2.33
Dll4		NM_019454.2	NM_019454.2:542	Endogenous	mRNA	100	28.79	5.09	5.38	5.1	4.13	4.4	4.6
Dnmt1		NM_010066.3	NM_010066.3:2380	Endogenous	mRNA	100	78.45	6.58	6.45	6.28	5.89	6.18	6.28
Dnmt3a		NM_007872.4	NM_007872.4:7160	Endogenous	mRNA	100	14.8	4.09	4.22	4.14	3.68	3.23	3.75
Dtx1		NM_008052.3	NM_008052.3:2018	Endogenous	mRNA	100	5.27	2.5	3.13	2.7	1.8	2.23	1.33
Dtx3		NM_030714.2	NM_030714.2:978	Endogenous	mRNA	100	54.28	5.75	5.69	5.93	5.61	5.78	5.79
Dtx4		NM_172442.3	NM_172442.3:3615	Endogenous	mRNA	100	119.27	7.11	7	7.07	6.47	7.01	6.62
Dusp10		NM_022019.5	NM_022019.5:145	Endogenous	mRNA	100	39.59	5.59	5.42	5.28	5.13	5.36	4.99
Dusp2		NM_010090.2	NM_010090.2:1472	Endogenous	mRNA	100	90.67	6.47	7.44	7.01	5.83	4.69	6.12
Dusp4		NM_176933.4	NM_176933.4:2200	Endogenous	mRNA	100	790.19	9.13	9.23	9.33	9.68	10.32	9.71
Dusp5		NM_001085390.1	NM_001085390.1:790	Endogenous	mRNA	100	159.34	6.99	7.68	7.22	6.8	7.54	7.47
Dusp6		NM_026268.2	NM_026268.2:1648	Endogenous	mRNA	100	554.01	9.21	9.41	9.25	8.84	9.02	8.86
Dusp8		NM_008748.1	NM_008748.1:790	Endogenous	mRNA	100	20.58	4.24	4.89	4.59	4.03	4.23	3.99
Dvl1		NM_010091.3	NM_010091.3:1530	Endogenous	mRNA	100	157.24	7.2	7.43	7.62	7.37	6.95	7.11
Dvl2		NM_007888.3	NM_007888.3:1695	Endogenous	mRNA	100	53.41	5.7	6.06	5.56	5.95	5.44	5.63
Dvl3		NM_007889.2	NM_007889.2:1550	Endogenous	mRNA	100	63.17	6.09	6.22	5.93	5.74	5.98	5.88
E2f1		NM_007891.4	NM_007891.4:926	Endogenous	mRNA	100	53.65	5.56	5.65	5.7	5.86	5.58	6.05
E2f5		NM_007892.2	NM_007892.2:700	Endogenous	mRNA	100	103.85	6.49	6.7	6.55	6.85	6.65	6.91
Efna1		NM_010107.4	NM_010107.4:437	Endogenous	mRNA	100	270.66	7.87	8.57	8.55	7.84	7.5	7.81
Efna2		NM_007909.3	NM_007909.3:1232	Endogenous	mRNA	100	26.12	4.31	5.56	5.14	4.61	3.55	4.21
Efna3		NM_010108.1	NM_010108.1:788	Endogenous	mRNA	100	65.16	6.28	6.9	6.63	5.17	4.62	5.1
Efna5		NM_207654.2	NM_207654.2:1130	Endogenous	mRNA	100	95.12	6.59	6.45	6.76	6.24	6.6	6.72
Egf		NM_010113.3	NM_010113.3:1886	Endogenous	mRNA	100	28.02	4.83	3.72	3.59	5.26	5.55	4.88
Egfr		NM_207655.2	NM_207655.2:1335	Endogenous	mRNA	100	75.1	6.2	6.38	6.64	5.71	6.18	6.1
Eif4ebp1		NM_007918.3	NM_007918.3:554	Endogenous	mRNA	100	1329.01	10.52	10.34	10.19	10.33	10.53	10.32
Elk1		NM_007922.4	NM_007922.4:3070	Endogenous	mRNA	100	10.71	3.38	3.13	3.35	3.68	3.69	3.21
Endog		NM_007931.1	NM_007931.1:568	Endogenous	mRNA	100	71.22	5.94	5.52	5.91	6.49	6.6	6.19
Ep300		NM_177821.6	NM_177821.6:4305	Endogenous	mRNA	100	455.25	8.9	8.96	8.79	8.72	8.8	8.8
Epha2		NM_010139.2	NM_010139.2:1705	Endogenous	mRNA	100	32.12	4.73	6.04	5.28	4.13	4.31	4.6
Epo		NM_007942.2	NM_007942.2:216	Endogenous	mRNA	100	7.63	0.92	2.94	3.35	3.22	3.55	2.33
Epor		NM_010149.3	NM_010149.3:294	Endogenous	mRNA	100	10.11	2.92	4.04	2.7	3.92	2.55	3.21
Erbb2		NM_001003817.1	NM_001003817.1:1395	Endogenous	mRNA	100	152.05	7.2	7.83	7.56	6.8	6.7	7.06
Erbb3		NM_010153.1	NM_010153.1:1290	Endogenous	mRNA	100	169.29	7.2	7.51	7.57	7.19	7.28	7.6
Ercc2		NM_007949.4	NM_007949.4:1800	Endogenous	mRNA	100	233.25	7.46	7.69	7.87	8.32	8.03	7.67
Ercc3		NM_133658.1	NM_133658.1:555	Endogenous	mRNA	100	244.41	7.97	8.16	7.87	7.69	7.93	7.95
Ercc4		NM_015769.1	NM_015769.1:445	Endogenous	mRNA	100	178.26	7.56	7.58	7.44	7.69	7.3	7.25
Ercc6		NM_001081221.1	NM_001081221.1:2016	Endogenous	mRNA	100	81.4	6.29	6.22	6.46	6.39	6.44	6.27
Ets2		NM_011809.2	NM_011809.2:3284	Endogenous	mRNA	100	708.35	9.43	9.62	9.61	9.06	9.42	9.58
Etv1		NM_007960.4	NM_007960.4:1836	Endogenous	mRNA	100	36.76	5.47	5.13	5.06	5.26	4.98	5.24
Etv4		NM_008815.2	NM_008815.2:1495	Endogenous	mRNA	100	81.56	6.44	7.25	6.47	5.54	5.36	6.21
Eya1		NM_001252192.1	NM_001252192.1:1016	Endogenous	mRNA	100	13.06	2.24	4.83	3.89	3.8	3.4	2.55
Ezh2		NM_007971.2	NM_007971.2:425	Endogenous	mRNA	100	293.54	8.02	8.29	8.04	8.46	8.09	8.23
Faap24		NM_178643.5	NM_178643.5:644	Endogenous	mRNA	100	58.64	5.53	6.06	5.93	6.17	5.72	5.72
Fanca		NM_016925.2	NM_016925.2:3350	Endogenous	mRNA	100	22.51	4.24	4.89	4.7	4.13	4.47	4.39
Fancb		NM_001146081.1	NM_001146081.1:2746	Endogenous	mRNA	100	37.16	4.83	4.83	5.06	5.31	5.75	5.3
Fancc		NM_007985.2	NM_007985.2:1115	Endogenous	mRNA	100	42.18	5.56	5.52	5.1	5.74	5.13	5.21
Fance		NM_001163819.1	NM_001163819.1:517	Endogenous	mRNA	100	24.88	4.38	4.38	4.7	5.08	4.93	4.14
Fancf		NM_001115087.1	NM_001115087.1:1128	Endogenous	mRNA	100	114.11	6.62	6.75	7.15	6.89	6.69	6.85
Fancg		NM_053081.1	NM_053081.1:813	Endogenous	mRNA	100	82.55	6.46	6.45	6.33	6.29	6.23	6.43
Fancl		NM_025923.3	NM_025923.3:154	Endogenous	mRNA	100	269.55	7.91	7.69	7.82	8.62	8.15	8.05
Fas		NM_007987.2	NM_007987.2:95	Endogenous	mRNA	100	92.32	6.62	6.62	6.64	6.41	6.34	6.51
Fasl		NM_010177.3	NM_010177.3:645	Endogenous	mRNA	100	6.34	2.92	2.72	1.89	1.8	3.55	2.33
Fbxw11		NM_134015.2	NM_134015.2:276	Endogenous	mRNA	100	581.19	9.15	9.19	9.28	9.09	9.2	9.18
Fbxw7		NM_080428.2	NM_080428.2:960	Endogenous	mRNA	100	145.74	7.1	7.09	7	7.26	7.2	7.43
Fen1		NM_001271614.1	NM_001271614.1:1880	Endogenous	mRNA	100	275.3	8.01	7.95	8	8.17	8.19	8.28
Fgf1		NM_010197.3	NM_010197.3:680	Endogenous	mRNA	83.33	4.07	0	2.72	0.89	3.03	1.81	1.75
Fgf10		NM_008002.4	NM_008002.4:1287	Endogenous	mRNA	100	78.08	7.43	5.94	5.87	5.47	6.2	5.85
Fgf11		NM_010198.1	NM_010198.1:183	Endogenous	mRNA	100	11.31	4.09	3.3	3.21	3.22	3.81	3.07
Fgf12		NM_001276419.1	NM_001276419.1:632	Endogenous	mRNA	100	8.2	2.73	2.72	2.21	3.22	4.23	1.75
Fgf13		NM_010200.2	NM_010200.2:700	Endogenous	mRNA	100	28.39	4.56	5.18	4.28	5.35	4.4	4.88
Fgf14		NM_207667.3	NM_207667.3:692	Endogenous	mRNA	100	11.84	2.73	3.94	3.35	4.03	3.55	3.45
Fgf15		NM_008003.2	NM_008003.2:315	Endogenous	mRNA	100	10	3.38	3.83	3.06	3.68	3.55	1.33
Fgf16		NM_030614.2	NM_030614.2:2295	Endogenous	mRNA	100	5.78	1.5	2.94	1.47	2.54	3.4	2.33
Fgf17		NM_008004.4	NM_008004.4:711	Endogenous	mRNA	100	7.7	3.24	2.45	2.47	3.54	3.03	2.55
Fgf18		NM_008005.1	NM_008005.1:482	Endogenous	mRNA	100	14.68	4.24	3.83	4.47	3.54	3.23	3.55
Fgf2		NM_008006.2	NM_008006.2:287	Endogenous	mRNA	100	35.11	5.53	5.42	5.47	4.47	4.69	4.88
Fgf20		NM_030610.1	NM_030610.1:475	Endogenous	mRNA	100	4.16	1.92	2.45	0.89	3.03	1.23	1.75
Fgf21		NM_020013.4	NM_020013.4:440	Endogenous	mRNA	100	2.14	1.5	0.13	1.89	0.22	1.23	0.75
Fgf22		NM_023304.1	NM_023304.1:165	Endogenous	mRNA	100	27.32	4.73	5.75	4.84	4.54	3.55	4.33
Fgf23		NM_022657.3	NM_022657.3:1246	Endogenous	mRNA	100	66.98	6.41	5.72	7.14	4.39	5.51	5.83
Fgf3		NM_008007.2	NM_008007.2:1005	Endogenous	mRNA	100	5.29	2.92	1.72	3.06	1.22	1.81	2.75
Fgf4		NM_010202.5	NM_010202.5:2785	Endogenous	mRNA	100	8.85	2.92	3.3	2.7	3.54	3.55	2.55
Fgf5		NM_001277268.1	NM_001277268.1:1072	Endogenous	mRNA	100	5.84	1.92	1.72	2.47	2.22	3.23	3.07
Fgf6		NM_010204.1	NM_010204.1:690	Endogenous	mRNA	100	5.69	1.92	2.45	2.47	3.22	2.55	2.07
Fgf7		NM_008008.4	NM_008008.4:213	Endogenous	mRNA	100	155.86	7.48	7.59	8.04	6.97	5.95	6.82
Fgf8		NM_001166361.1	NM_001166361.1:590	Endogenous	mRNA	100	8.81	2.5	3.3	3.47	2.8	3.55	2.92
Fgf9		NM_013518.3	NM_013518.3:1070	Endogenous	mRNA	100	10.09	3.62	3.59	3.35	3.54	3.23	2.33
Fgfr1		NM_001079908.2	NM_001079908.2:1308	Endogenous	mRNA	100	339.97	8.52	8.7	8.68	7.95	8.22	8.25
Fgfr2		NM_010207.2	NM_010207.2:3205	Endogenous	mRNA	100	40.77	5.38	6.06	5.35	5.35	4.62	4.92
Fgfr3		NM_008010.3	NM_008010.3:3520	Endogenous	mRNA	100	39.46	5.09	5.78	5.84	4.68	4.47	5.42
Fgfr4		NM_008011.2	NM_008011.2:1665	Endogenous	mRNA	83.33	2.76	0	1.13	0.89	2.22	1.81	1.75
Figf		NM_010216.1	NM_010216.1:934	Endogenous	mRNA	100	141.41	7.82	7.15	7.34	6.43	6.84	6.88
Flna		NM_010227.2	NM_010227.2:8205	Endogenous	mRNA	100	170.39	7.35	7.63	7.86	7.26	6.94	7.25
Flnc		NM_001081185.1	NM_001081185.1:5118	Endogenous	mRNA	100	26.08	4.83	4.45	5.5	4.13	3.81	4.88
Flt1		NM_010228.3	NM_010228.3:1550	Endogenous	mRNA	100	31.37	4.92	5.62	5.5	4.03	4.4	4.7
Flt3		NM_010229.2	NM_010229.2:3302	Endogenous	mRNA	100	8.2	3.24	2.94	3.35	3.03	2.81	2.75
Fn1		NM_010233.1	NM_010233.1:2627	Endogenous	mRNA	100	4142.86	12.15	12.39	12.69	11.11	11.15	11.89
Fos		NM_010234.2	NM_010234.2:1330	Endogenous	mRNA	100	277.9	7.73	8.09	7.96	7.73	7.98	8.88
Fosl1		NM_010235.2	NM_010235.2:353	Endogenous	mRNA	100	25.56	4.09	5.22	5.38	4.13	4.31	4.33
Foxl2		NM_012020.2	NM_012020.2:2379	Endogenous	mRNA	100	11.03	3.24	2.94	4.21	3.8	3.03	3.07
Foxo4		NM_018789.2	NM_018789.2:114	Endogenous	mRNA	100	177.55	7.41	7.65	7.39	7.44	7.45	7.49
Fst		NM_008046.1	NM_008046.1:680	Endogenous	mRNA	100	120.61	7.06	7.87	7.15	6.08	5.69	6.58
Fubp1		NM_057172.2	NM_057172.2:370	Endogenous	mRNA	100	242.97	7.91	8.01	8.06	7.99	7.57	7.96
Fut8		NM_016893.4	NM_016893.4:2235	Endogenous	mRNA	100	206.09	7.8	7.25	7.4	7.56	8.08	7.87
Fzd10		NM_175284.3	NM_175284.3:2030	Endogenous	mRNA	100	199.01	7.71	8.53	8.08	6.82	6.34	7.22
Fzd2		NM_020510.2	NM_020510.2:2955	Endogenous	mRNA	100	40.38	5.5	5.83	5.56	4.74	4.98	5.1
Fzd3		NM_021458.1	NM_021458.1:360	Endogenous	mRNA	100	115.81	6.71	7.15	6.82	6.96	6.8	6.63
Fzd7		NM_008057.3	NM_008057.3:4350	Endogenous	mRNA	100	305.3	8.16	8.07	8.32	8.38	8.18	8.38
Fzd8		NM_008058.1	NM_008058.1:810	Endogenous	mRNA	100	10.84	2.24	3.3	3.98	3.54	4.03	2.75
Fzd9		NM_010246.1	NM_010246.1:745	Endogenous	mRNA	100	7.62	2.5	3.13	1.89	3.03	3.23	3.33
Gadd45a		NM_007836.1	NM_007836.1:654	Endogenous	mRNA	100	227.73	7.97	7.93	7.94	7.91	7.63	7.55
Gadd45b		NM_008655.1	NM_008655.1:109	Endogenous	mRNA	100	190.14	7.84	7.79	7.86	7.22	7.06	7.45
Gadd45g		NM_011817.1	NM_011817.1:15	Endogenous	mRNA	100	101.38	6.79	6.89	6.92	6.17	6.69	6.38
Gas1		NM_008086.1	NM_008086.1:1964	Endogenous	mRNA	100	183.71	7.73	7.61	7.88	7.41	7.03	7.3
Gata1		NM_008089.1	NM_008089.1:1640	Endogenous	mRNA	100	10.84	3.24	3.13	3.21	3.8	3.93	3.07
Gata2		NM_008090.4	NM_008090.4:2960	Endogenous	mRNA	100	80.17	6.95	6.32	6.46	5.8	5.9	6.21
Gata3		NM_008091.3	NM_008091.3:1943	Endogenous	mRNA	100	854.22	9.58	9.98	9.83	9.53	9.7	9.76
Gdf6		NM_013526.1	NM_013526.1:1854	Endogenous	mRNA	100	12.34	3.09	4.04	4.35	3.68	2.55	3.33
Ghr		NM_001048147.1	NM_001048147.1:540	Endogenous	mRNA	100	763.3	10.34	8.92	8.63	9.58	10.09	9.1
Gli1		NM_010296.2	NM_010296.2:2279	Endogenous	mRNA	100	12.78	3.5	3.59	3.79	3.8	2.81	4.21
Gli3		NM_008130.2	NM_008130.2:6930	Endogenous	mRNA	100	28.48	4.87	5.52	5.02	4.03	4.13	4.88
Gna11		NM_010301.3	NM_010301.3:965	Endogenous	mRNA	100	248.89	7.75	7.86	8.01	8.11	8.1	7.89
Gnaq		NM_008139.5	NM_008139.5:3080	Endogenous	mRNA	100	392.48	8.75	8.48	8.57	8.55	8.68	8.65
Gnas		NM_010309.3	NM_010309.3:2592	Endogenous	mRNA	100	944.15	9.91	9.75	9.93	9.79	10	9.91
Gng12		NM_001177559.1	NM_001177559.1:898	Endogenous	mRNA	100	436.55	8.7	8.92	8.76	8.73	8.63	8.87
Gng2		NM_010315.4	NM_010315.4:1352	Endogenous	mRNA	100	45.29	5.8	5.65	5.56	5.5	5.03	5.33
Gng4		NM_010317.2	NM_010317.2:2034	Endogenous	mRNA	100	19.86	4.17	5.13	4.79	4.03	2.81	3.92
Gng7		NM_001038655.1	NM_001038655.1:1160	Endogenous	mRNA	100	22.75	3.73	4.22	3.98	4.61	5.13	4.88
Gngt1		NM_010314.2	NM_010314.2:150	Endogenous	mRNA	100	5.93	1.92	3.45	2.7	2.22	2.23	2.33
Gpc4		NM_008150.2	NM_008150.2:310	Endogenous	mRNA	100	607.55	9.26	9.51	9.39	8.83	9.19	9.21
Grb2		NM_008163.3	NM_008163.3:1783	Endogenous	mRNA	100	310.1	8.6	8.24	8.33	7.99	8.04	8.36
Gria3		NM_016886.3	NM_016886.3:390	Endogenous	mRNA	100	135.34	7.42	7.57	7.46	6.71	6.29	6.51
Grin1		NM_008169.2	NM_008169.2:492	Endogenous	mRNA	83.33	3.76	0	2.13	0.89	3.03	2.23	1.33
Grin2a		NM_008170.2	NM_008170.2:1788	Endogenous	mRNA	100	10.32	2.73	3.13	3.47	3.22	3.93	3.45
Grin2b		NM_008171.3	NM_008171.3:6340	Endogenous	mRNA	100	5.07	2.73	1.72	1.89	3.39	2.23	0.75
Gsk3b		NM_019827.3	NM_019827.3:2215	Endogenous	mRNA	100	549.07	9.16	9.16	9.2	9.02	8.95	9.1
Gtf2h3		NM_181410.3	NM_181410.3:38	Endogenous	mRNA	100	175.74	7.43	7.51	7.53	7.52	7.29	7.43
Gzmb		NM_013542.2	NM_013542.2:1020	Endogenous	mRNA	100	8.81	1.92	3.13	3.47	3.03	3.93	2.55
H2afx		NM_010436.2	NM_010436.2:980	Endogenous	mRNA	100	444.05	8.94	9.04	8.81	8.7	8.36	8.84
H3f3a		NM_008210.4	NM_008210.4:450	Endogenous	mRNA	100	15920	13.88	14.05	13.97	14.08	13.78	13.97
Hdac1		NM_008228.2	NM_008228.2:631	Endogenous	mRNA	100	475.92	8.9	9.03	9.05	8.85	8.59	8.91
Hdac10		NM_199198.1	NM_199198.1:2155	Endogenous	mRNA	100	34.84	5.09	4.94	4.7	5.43	5.36	5.1
Hdac11		NM_144919.2	NM_144919.2:610	Endogenous	mRNA	100	37.07	5.09	4.78	5.41	5.35	5.23	5.33
Hdac2		NM_008229.2	NM_008229.2:1010	Endogenous	mRNA	100	662.45	9.32	9.45	9.46	9.48	9.14	9.36
Hdac4		NM_207225.1	NM_207225.1:2800	Endogenous	mRNA	100	53.3	5.83	5.96	6.31	5.54	4.87	5.5
Hdac5		NM_010412.3	NM_010412.3:2122	Endogenous	mRNA	100	221.03	7.65	7.86	7.81	7.98	7.74	7.66
Hdac6		NM_010413.3	NM_010413.3:2195	Endogenous	mRNA	100	44.59	5.44	5.69	5.5	5.65	5.03	5.47
Hells		NM_008234.3	NM_008234.3:1082	Endogenous	mRNA	100	237.71	7.55	7.72	7.66	8.36	7.83	8.07
Hes1		NM_008235.2	NM_008235.2:983	Endogenous	mRNA	100	12.75	3.09	3.72	4.79	3.03	2.23	3.83
Hes5		NM_010419.4	NM_010419.4:1145	Endogenous	mRNA	100	5.86	2.5	2.13	2.47	3.39	1.23	2.75
Hgf		NM_010427.5	NM_010427.5:483	Endogenous	mRNA	100	2077.41	10.39	9.26	9.29	11.85	12.03	10.97
Hhex		NM_008245.2	NM_008245.2:1440	Endogenous	mRNA	100	72.88	6.52	6.42	6.36	5.71	5.93	6.01
Hhip		NM_020259.4	NM_020259.4:1784	Endogenous	mRNA	100	12.76	3.92	3.72	2.7	2.8	4.47	3.65
Hist1h3b		NM_178203.1	NM_178203.1:121	Endogenous	mRNA	100	9901.33	12.96	13.4	13.22	13.79	12.76	13.28
Hist2h3b		NM_178215.1	NM_178215.1:297	Endogenous	mRNA	100	36790	15.01	15.25	15.04	15.67	14.73	15.12
Hist2h3c2		NM_054045.3	NM_054045.3:825	Endogenous	mRNA	100	42.38	5.41	5.13	5.56	5.95	5.13	5.03
Hmga1		NM_001025427.2	NM_001025427.2:1036	Endogenous	mRNA	100	116.81	7.11	7.43	7.2	6.15	6.36	6.49
Hmga2		NM_010441.2	NM_010441.2:3565	Endogenous	mRNA	100	37.09	4.87	5.38	5.35	5.39	4.62	5.47
Hnf1a		NM_009327.1	NM_009327.1:2695	Endogenous	mRNA	100	3.24	1.5	2.45	1.47	1.22	1.81	1.33
Hoxa10		NM_008263.3	NM_008263.3:1205	Endogenous	mRNA	100	21.35	4.67	4.72	5.02	3.8	4.31	3.33
Hoxa11		NM_010450.2	NM_010450.2:955	Endogenous	mRNA	100	5.75	2.24	2.13	1.89	3.22	3.03	2.07
Hoxa9		NM_010456.2	NM_010456.2:985	Endogenous	mRNA	100	8.2	2.24	3.72	2.21	3.03	3.23	3.21
Hpgd		NM_008278.2	NM_008278.2:845	Endogenous	mRNA	100	216.54	7.78	7.58	7.8	7.6	7.77	7.98
Hras		NM_001130443.1	NM_001130443.1:240	Endogenous	mRNA	100	524.51	9	9.35	9.26	9.03	8.64	8.81
Hsp90b1		NM_011631.1	NM_011631.1:1705	Endogenous	mRNA	100	3625.21	11.84	11.79	11.83	11.99	11.76	11.71
Hspa1a		NM_010479.2	NM_010479.2:2184	Endogenous	mRNA	100	273.36	7.75	8.19	8.45	7.08	7.77	8.75
Hspa2		NM_008301.4	NM_008301.4:1795	Endogenous	mRNA	100	26.48	5.01	4.89	5.14	4.22	4.31	4.55
Hspb1		NM_013560.2	NM_013560.2:630	Endogenous	mRNA	100	1035.41	9.91	11.07	10.61	8.69	8.55	9.54
Ibsp		NM_008318.3	NM_008318.3:114	Endogenous	mRNA	100	15.58	3.38	4.59	4.47	3.54	3.55	3.75
Id1		NM_010495.2	NM_010495.2:280	Endogenous	mRNA	100	814.96	9.89	10.35	10.16	9.24	8.55	8.98
Id2		NM_010496.3	NM_010496.3:625	Endogenous	mRNA	100	2474.82	11.14	10.73	11.07	12	11.3	11.06
Id4		NM_031166.2	NM_031166.2:875	Endogenous	mRNA	100	79.72	6.47	6.56	6.62	5.86	5.87	6.33
Idh1		NM_010497.2	NM_010497.2:495	Endogenous	mRNA	100	570.59	9.37	8.93	9.06	9.27	9.11	9.15
Idh2		NM_173011.2	NM_173011.2:373	Endogenous	mRNA	100	159.67	7.31	6.83	7.25	7.6	7.41	7.4
Ifna1		NM_010502.2	NM_010502.2:354	Endogenous	mRNA	100	10.95	2.92	3.83	3.89	3.22	3.4	3.21
Ifnar1		NM_010508.1	NM_010508.1:1195	Endogenous	mRNA	100	493.57	9.18	8.96	9.18	8.81	8.68	8.8
Ifnar2		NM_001110498.1	NM_001110498.1:725	Endogenous	mRNA	100	348.33	8.65	8.54	8.4	8.35	8.18	8.49
Ifnb1		NM_010510.1	NM_010510.1:335	Endogenous	mRNA	66.67	2.48	3.24	0.13	0	0.22	0.23	0
Ifng		NM_008337.1	NM_008337.1:95	Endogenous	mRNA	100	4.87	1.5	2.45	2.89	3.03	0.23	2.07
Igf1		NM_001111274.1	NM_001111274.1:418	Endogenous	mRNA	100	71.76	6.69	5.96	6.4	6.13	5.84	5.75
Igf1r		NM_010513.2	NM_010513.2:3390	Endogenous	mRNA	100	137.46	7.1	7.57	7.55	6.61	6.64	6.83
Igfbp3		NM_008343.2	NM_008343.2:1645	Endogenous	mRNA	100	454.91	8.47	9.97	9.61	7.7	6.97	8.02
Ikbkb		NM_010546.2	NM_010546.2:498	Endogenous	mRNA	100	413.92	8.7	8.76	8.78	8.51	8.74	8.65
Ikbkg		NM_178590.2	NM_178590.2:525	Endogenous	mRNA	100	92.32	6.36	6.42	6.46	6.7	6.62	6.59
Il10		NM_010548.1	NM_010548.1:985	Endogenous	mRNA	100	6.42	3.24	3.13	2.7	2.54	2.23	1.75
Il11		NM_008350.2	NM_008350.2:285	Endogenous	mRNA	100	8.68	2.92	3.3	3.21	2.8	2.55	3.65
Il11ra1		NM_010549.3	NM_010549.3:22	Endogenous	mRNA	100	88.14	6.8	6.09	6.49	6.68	6.4	6.19
Il11ra2		NM_001099348.1	NM_001099348.1:122	Endogenous	mRNA	100	6.29	2.73	2.72	2.47	3.22	2.23	2.33
Il12a		NM_008351.1	NM_008351.1:355	Endogenous	mRNA	100	10.35	3.5	2.94	3.59	3.8	3.69	2.07
Il12b		NM_001303244.1	NM_001303244.1:414	Endogenous	mRNA	100	21.1	4.5	3.3	3.59	4.61	4.69	4.99
Il12rb2		NM_008354.3	NM_008354.3:1395	Endogenous	mRNA	100	22.94	4.38	4.94	4.47	4.39	4.62	4.21
Il13		NM_008355.2	NM_008355.2:425	Endogenous	mRNA	100	5.88	3.09	2.94	1.47	3.22	0.23	2.55
Il13ra2		NM_008356.3	NM_008356.3:1010	Endogenous	mRNA	100	71.48	6.7	6.18	6.98	5.83	4.4	5.6
Il15		NM_008357.2	NM_008357.2:854	Endogenous	mRNA	100	39.87	5.17	4.59	4.75	5.31	6.18	5.33
Il19		NM_001009940.1	NM_001009940.1:905	Endogenous	mRNA	100	25.36	4.73	5.52	5.1	4.13	2.81	4.39
Il1a		NM_010554.4	NM_010554.4:225	Endogenous	mRNA	100	32.83	4.96	6.11	5.59	3.8	3.69	4.45
Il1b		NM_008361.3	NM_008361.3:1120	Endogenous	mRNA	100	210.78	7.71	7.87	8.28	7.56	6.84	7.69
Il1r1		NM_001123382.1	NM_001123382.1:820	Endogenous	mRNA	100	505.2	9.39	9.12	9.32	8.49	8.61	8.71
Il1r2		NM_010555.4	NM_010555.4:458	Endogenous	mRNA	100	66.32	5.96	6.2	6.53	6.2	5.72	5.45
Il1rap		NM_134103.2	NM_134103.2:945	Endogenous	mRNA	100	306.67	8.15	8.15	8.25	8.43	8.29	8.27
Il2		NM_008366.2	NM_008366.2:485	Endogenous	mRNA	100	6.03	2.24	1.72	2.7	3.54	2.55	2.07
Il20ra		NM_172786.2	NM_172786.2:1860	Endogenous	mRNA	100	4.49	2.73	2.94	2.21	0.22	1.81	1.75
Il20rb		NM_001033543.3	NM_001033543.3:813	Endogenous	mRNA	100	18.75	3.62	4.52	3.98	4.47	4.55	3.99
Il22ra1		NM_178257.1	NM_178257.1:685	Endogenous	mRNA	100	10.18	1.92	3.94	4.14	3.03	2.81	3.21
Il22ra2		NM_178258.5	NM_178258.5:20	Endogenous	mRNA	100	3.28	1.92	1.13	1.89	1.22	1.81	2.07
Il23a		NM_031252.1	NM_031252.1:360	Endogenous	mRNA	100	10.02	3.5	3.72	3.21	3.39	2.55	3.33
Il23r		NM_144548.1	NM_144548.1:690	Endogenous	mRNA	100	9.54	2.73	4.3	1.89	3.39	3.55	2.33
Il24		NM_053095.2	NM_053095.2:545	Endogenous	mRNA	100	39.44	5.28	6.38	5.84	4.31	4.31	4.14
Il2ra		NM_008367.2	NM_008367.2:325	Endogenous	mRNA	100	73.53	6.63	6.47	6.28	5.71	5.72	6.14
Il2rb		NM_008368.3	NM_008368.3:2365	Endogenous	mRNA	100	60.22	6.44	5.62	5.62	5.86	6.18	5.5
Il3		NM_010556.4	NM_010556.4:155	Endogenous	mRNA	83.33	5	1.5	2.45	0	2.8	2.81	2.75
Il3ra		NM_008369.1	NM_008369.1:567	Endogenous	mRNA	100	84.89	6.67	6.67	6.64	6.13	6.01	6.16
Il4		NM_021283.1	NM_021283.1:345	Endogenous	mRNA	100	6.22	1.92	2.45	3.59	2.54	1.81	2.75
Il5ra		NM_008370.2	NM_008370.2:2290	Endogenous	mRNA	100	8.41	3.38	2.72	3.06	3.68	3.03	2.07
Il6		NM_031168.1	NM_031168.1:40	Endogenous	mRNA	100	26.93	5.09	4.72	5.38	4.68	3.4	4.55
Il6ra		NM_010559.2	NM_010559.2:2825	Endogenous	mRNA	100	168.09	7.62	7.28	7.32	7.15	7.44	7.5
Il7		NM_008371.2	NM_008371.2:1055	Endogenous	mRNA	100	7.75	2.73	2.72	2.89	2.8	3.4	3.07
Il7r		NM_008372.3	NM_008372.3:1020	Endogenous	mRNA	100	103.15	7	6.52	6.67	6.37	6.7	6.79
Inhba		NM_008380.1	NM_008380.1:750	Endogenous	mRNA	100	56.45	5.67	6.56	6.59	5.03	4.4	5.45
Inhbb		NM_008381.3	NM_008381.3:1084	Endogenous	mRNA	100	3.86	1.5	0.13	1.89	2.54	2.23	2.33
Insr		NM_010568.2	NM_010568.2:8314	Endogenous	mRNA	100	151.04	7.39	7.01	7.39	6.93	7.28	7.36
Irak2		NM_001113553.1	NM_001113553.1:485	Endogenous	mRNA	100	137.7	6.97	7.25	7.29	7.05	7.06	6.97
Irak3		NM_028679.3	NM_028679.3:2608	Endogenous	mRNA	100	118.15	7	7.13	7.15	6.39	6.62	6.88
Irs1		NM_010570.4	NM_010570.4:2135	Endogenous	mRNA	100	28.1	4.31	5.13	4.84	4.54	5.23	4.6
Itga2		NM_008396.2	NM_008396.2:1860	Endogenous	mRNA	100	43.25	5.62	5.91	6.04	4.74	4.31	5.24
Itga3		NM_013565.2	NM_013565.2:1065	Endogenous	mRNA	100	101.42	6.59	7.03	7.08	6.15	6.18	6.69
Itga6		NM_008397.3	NM_008397.3:910	Endogenous	mRNA	100	1080.19	9.77	9.81	10	10.12	10.41	10.24
Itga7		NM_008398.2	NM_008398.2:2435	Endogenous	mRNA	100	28.23	5.5	4.13	4.79	4.47	5.08	4.5
Itga8		NM_001001309.2	NM_001001309.2:5048	Endogenous	mRNA	100	103.71	6.03	5.96	5.93	7.1	7.22	7.21
Itga9		NM_001113514.1	NM_001113514.1:440	Endogenous	mRNA	100	69.42	6.33	6.4	6.46	5.68	5.51	6.07
Itgb3		NM_016780.2	NM_016780.2:2595	Endogenous	mRNA	100	60.06	5.83	6.4	6.44	5.39	5.13	5.79
Itgb4		NM_001005608.2	NM_001005608.2:3355	Endogenous	mRNA	100	126.52	7.2	7.43	7.54	6.1	6.18	6.81
Itgb6		NM_001159564.1	NM_001159564.1:555	Endogenous	mRNA	100	56.59	5.78	6.52	5.67	5.71	4.98	5.85
Itgb7		NM_013566.2	NM_013566.2:1221	Endogenous	mRNA	100	19.33	4.83	4.04	4.7	4.13	3.93	3.65
Itgb8		NM_177290.3	NM_177290.3:2405	Endogenous	mRNA	100	123.13	6.85	6.76	6.89	7.08	7.02	7.04
Jag1		NM_013822.2	NM_013822.2:2155	Endogenous	mRNA	100	171.29	7.48	8.29	7.98	6.66	6.23	6.76
Jag2		NM_010588.2	NM_010588.2:219	Endogenous	mRNA	100	26.24	4.56	5.3	5.14	4.97	3.23	4.21
Jak1		NM_146145.2	NM_146145.2:4080	Endogenous	mRNA	100	1219.93	10.33	10.24	10.16	10.13	10.29	10.36
Jak2		NM_008413.2	NM_008413.2:1049	Endogenous	mRNA	100	492.4	9.23	8.85	9.06	8.82	8.85	8.81
Jak3		NM_010589.5	NM_010589.5:145	Endogenous	mRNA	100	83.98	6.52	6.28	6.73	6.26	6.34	6.14
Jun		NM_010591.2	NM_010591.2:2212	Endogenous	mRNA	100	500.8	9.07	9.19	9.14	8.59	8.66	9.05
Kat2b		NM_001190846.1	NM_001190846.1:622	Endogenous	mRNA	100	213.92	7.8	7.39	7.77	7.9	7.83	7.71
Kdm5c		NM_013668.3	NM_013668.3:750	Endogenous	mRNA	100	811.99	9.75	9.91	9.71	9.3	9.61	9.66
Kdm6a		NM_009483.1	NM_009483.1:2560	Endogenous	mRNA	100	175.28	7.53	7.23	7.24	7.54	7.5	7.63
Kdr		NM_010612.2	NM_010612.2:995	Endogenous	mRNA	100	171.3	7.62	7.84	7.57	6.66	7.32	7.23
Kit		NM_001122733.1	NM_001122733.1:4275	Endogenous	mRNA	100	126.09	6.95	6.65	6.82	6.82	7.12	7.38
Kitl		NM_013598.1	NM_013598.1:280	Endogenous	mRNA	100	438.27	8.84	8.45	8.65	8.95	8.97	8.72
Klf4		NM_010637.3	NM_010637.3:2397	Endogenous	mRNA	100	1118.01	10.26	11.01	10.6	9.11	8.84	9.74
Kmt2c		NM_001081383.1	NM_001081383.1:7075	Endogenous	mRNA	100	94.96	6.5	6.8	6.43	6.33	6.72	6.58
Kmt2d		NM_001033276.1	NM_001033276.1:2736	Endogenous	mRNA	100	208.48	7.86	7.88	7.91	7.46	7.52	7.51
Kras		NM_021284.5	NM_021284.5:2620	Endogenous	mRNA	100	102.74	7	6.62	6.52	6.97	5.9	6.82
Lama1		NM_008480.2	NM_008480.2:1302	Endogenous	mRNA	100	30.3	4.09	5.09	4.7	4.92	5.65	4.6
Lama3		NM_010680.1	NM_010680.1:7600	Endogenous	mRNA	100	162.98	7.41	8.34	7.94	6.24	5.9	6.69
Lama5		NM_001081171.2	NM_001081171.2:4054	Endogenous	mRNA	100	47.62	5.67	6.15	6.12	4.74	4.62	5.42
Lamb3		NM_008484.2	NM_008484.2:718	Endogenous	mRNA	100	232.92	7.87	8.29	7.9	7.41	7.47	8.04
Lamc2		NM_008485.3	NM_008485.3:1295	Endogenous	mRNA	100	333.12	8.38	9.19	9.05	7.09	7.36	7.96
Lamc3		NM_011836.3	NM_011836.3:4896	Endogenous	mRNA	100	11.66	3.73	3.72	3.59	3.54	3.81	2.55
Lat		NM_010689.2	NM_010689.2:760	Endogenous	mRNA	100	13	4.24	3.59	3.47	3.54	3.55	3.65
Lef1		NM_010703.3	NM_010703.3:1337	Endogenous	mRNA	100	77.66	6.29	7.19	6.75	5.35	5.36	5.72
Lefty1		NM_010094.3	NM_010094.3:1255	Endogenous	mRNA	100	29.44	5.01	5.04	4.59	4.31	5.13	5.03
Lefty2		NM_177099.3	NM_177099.3:2120	Endogenous	mRNA	100	3.06	1.5	2.13	1.47	1.22	1.81	1.33
Lep		NM_008493.3	NM_008493.3:1115	Endogenous	mRNA	100	74.95	7.79	4.45	4.79	6.08	6.36	4.88
Lepr		NM_010704.2	NM_010704.2:600	Endogenous	mRNA	100	365.51	8.76	8.69	8.8	8.37	7.86	8.41
Lfng		NM_008494.3	NM_008494.3:1965	Endogenous	mRNA	100	438.11	8.92	8.93	9.19	8.6	8.34	8.49
Lgr5		NM_010195.2	NM_010195.2:2123	Endogenous	mRNA	100	18.19	4.56	4.83	3.79	3.39	4.13	3.92
Lif		NM_008501.2	NM_008501.2:3435	Endogenous	mRNA	100	35.51	5.31	5.94	5.77	4.8	3.23	4.33
Lifr		NM_001113386.1	NM_001113386.1:2466	Endogenous	mRNA	100	214.14	8.04	7.69	7.55	7.54	7.89	7.68
Lig4		NM_176953.3	NM_176953.3:1415	Endogenous	mRNA	100	86.23	6.28	6.57	6.63	6.26	6.44	6.36
Lrp2		NM_001081088.1	NM_001081088.1:2935	Endogenous	mRNA	83.33	5.28	2.73	2.94	0	2.54	2.23	2.55
Ltbp1		NM_019919.2	NM_019919.2:5280	Endogenous	mRNA	100	96.67	6.86	7.14	6.67	6.22	6.11	6.27
Mad2l2		NM_027985.2	NM_027985.2:565	Endogenous	mRNA	100	58.32	6.05	5.56	5.93	5.92	5.9	5.79
Maml2		NM_001013813.2	NM_001013813.2:5095	Endogenous	mRNA	100	127.79	7.01	6.95	6.82	6.89	7.16	7.13
Map2k1		NM_008927.3	NM_008927.3:1695	Endogenous	mRNA	100	434.47	8.66	8.81	8.94	8.67	8.67	8.81
Map2k2		NM_023138.4	NM_023138.4:1440	Endogenous	mRNA	100	504.72	8.97	9.05	9.06	8.85	9.02	8.91
Map2k4		NM_009157.4	NM_009157.4:1335	Endogenous	mRNA	100	395.36	8.64	8.81	8.74	8.49	8.49	8.57
Map2k6		NM_011943.2	NM_011943.2:320	Endogenous	mRNA	100	16.04	4.09	3.72	3.79	4.74	3.69	3.65
Map3k1		NM_011945.2	NM_011945.2:1640	Endogenous	mRNA	100	331.26	8.49	8.29	8.34	8.36	8.43	8.31
Map3k12		NM_009582.4	NM_009582.4:4720	Endogenous	mRNA	100	6.98	2.73	2.72	2.7	3.22	2.81	2.55
Map3k13		NM_172821.3	NM_172821.3:4764	Endogenous	mRNA	100	19.17	3.62	4.45	4.47	4.54	3.23	4.7
Map3k14		NM_016896.3	NM_016896.3:3930	Endogenous	mRNA	100	51.19	5.56	5.45	5.79	5.74	5.93	5.53
Map3k5		NM_008580.4	NM_008580.4:640	Endogenous	mRNA	100	141.32	7.33	7.2	7.28	6.95	6.88	7.16
Map3k7		NM_009316.1	NM_009316.1:822	Endogenous	mRNA	100	184.96	7.45	7.56	7.55	7.55	7.63	7.45
Map3k8		NM_007746.2	NM_007746.2:675	Endogenous	mRNA	100	119.29	7.09	7.21	7.07	6.61	6.53	6.75
Mapk1		NM_011949.3	NM_011949.3:1210	Endogenous	mRNA	100	940.67	9.9	9.91	9.89	9.84	9.79	9.93
Mapk10		NM_001081567.1	NM_001081567.1:1496	Endogenous	mRNA	100	13.18	3.38	3.45	3.7	4.03	4.13	3.45
Mapk12		NM_013871.3	NM_013871.3:1586	Endogenous	mRNA	100	15.2	4.31	3.72	3.47	4.03	4.31	3.45
Mapk3		NM_011952.2	NM_011952.2:825	Endogenous	mRNA	100	747.24	9.6	9.74	9.58	9.37	9.43	9.52
Mapk8		NM_016700.3	NM_016700.3:970	Endogenous	mRNA	100	260.84	7.89	7.96	8.04	8.26	7.97	8
Mapk8ip1		NM_001202445.1	NM_001202445.1:906	Endogenous	mRNA	100	32.75	5.17	4.78	4.93	5.31	5.18	4.75
Mapk8ip2		NM_021921.2	NM_021921.2:2370	Endogenous	mRNA	100	4.1	2.92	1.13	0.89	2.54	2.23	1.33
Mapk9		NM_001163672.1	NM_001163672.1:1635	Endogenous	mRNA	100	245.79	8.24	7.81	7.99	7.94	7.81	7.81
Mapt		NM_001038609.2	NM_001038609.2:1202	Endogenous	mRNA	100	12.23	3.62	4.38	4.28	3.39	0.23	3.21
Mcm2		NM_008564.2	NM_008564.2:2585	Endogenous	mRNA	100	74.23	6.41	6.01	6.28	5.89	6.27	6.35
Mcm4		NM_008565.3	NM_008565.3:3130	Endogenous	mRNA	100	553.82	9.04	9.21	9.13	9.01	9	9.27
Mcm5		NM_008566.2	NM_008566.2:2609	Endogenous	mRNA	100	33.97	4.92	5.13	5.25	4.8	5.23	5.14
Mcm7		NM_008568.2	NM_008568.2:2200	Endogenous	mRNA	100	505.28	8.83	8.93	9.08	9	8.85	9.17
Mdc1		NM_001010833.2	NM_001010833.2:5900	Endogenous	mRNA	100	92.83	6.43	6.11	6.73	6.03	6.91	6.78
Mdm2		NM_010786.3	NM_010786.3:515	Endogenous	mRNA	100	110.34	6.67	7.09	6.81	6.83	6.7	6.55
Mecom		NM_007963.2	NM_007963.2:728	Endogenous	mRNA	100	21.5	4.5	4.94	4.35	4.22	4.31	4.07
Med12		NM_021521.2	NM_021521.2:342	Endogenous	mRNA	100	189.8	7.68	7.67	7.73	7.48	7.25	7.55
Men1		NM_008583.2	NM_008583.2:733	Endogenous	mRNA	100	90.02	6.43	6.67	6.53	6.24	6.49	6.55
Met		NM_008591.1	NM_008591.1:3190	Endogenous	mRNA	100	288.31	7.91	7.69	7.5	8.27	8.62	8.65
Mfng		NM_008595.2	NM_008595.2:971	Endogenous	mRNA	100	37.94	5.53	5.26	4.79	5.31	5.58	4.79
Mgmt		NM_008598.2	NM_008598.2:350	Endogenous	mRNA	100	65.71	5.96	5.83	5.59	5.89	6.55	6.21
Mlf1		NM_001039543.2	NM_001039543.2:162	Endogenous	mRNA	100	68.34	5.85	6.28	6.47	6.43	5.72	5.55
Mlh1		NM_026810.2	NM_026810.2:1742	Endogenous	mRNA	100	97.08	6.63	6.09	6.4	6.79	6.65	6.91
Mllt3		NM_027326.3	NM_027326.3:4506	Endogenous	mRNA	100	77.68	6.13	6.3	6.31	6	6.38	6.5
Mllt4		NM_010806.1	NM_010806.1:1090	Endogenous	mRNA	100	380.92	8.62	9	8.72	8.3	8.09	8.53
Mmp3		NM_010809.1	NM_010809.1:1575	Endogenous	mRNA	100	2221.66	11.56	11.3	11.07	10.85	11.06	10.69
Mmp7		NM_010810.4	NM_010810.4:350	Endogenous	mRNA	100	44.9	5.73	5.96	6.08	5.35	4.47	4.55
Mmp9		NM_013599.2	NM_013599.2:1570	Endogenous	mRNA	100	115.63	6.96	7.75	7.45	5.74	5.55	6.28
Mnat1		NM_008612.2	NM_008612.2:914	Endogenous	mRNA	100	214.36	7.54	7.65	7.71	8.08	7.59	7.83
Mpl		NM_001122949.1	NM_001122949.1:295	Endogenous	mRNA	100	8.51	2.92	3.94	3.47	2.54	2.81	2.07
Mpo		NM_010824.2	NM_010824.2:1645	Endogenous	mRNA	100	85.69	7.78	6.06	6.08	6.47	5.55	4.65
Msh2		NM_008628.2	NM_008628.2:1870	Endogenous	mRNA	100	223	7.77	7.69	7.68	7.77	7.86	8
Msh6		NM_010830.1	NM_010830.1:4050	Endogenous	mRNA	100	254.8	7.93	8.06	7.98	7.88	8.11	8
Mtor		NM_020009.2	NM_020009.2:2432	Endogenous	mRNA	100	90.49	6.33	6.8	6.44	6.56	6.34	6.47
Mutyh		NM_001159581.1	NM_001159581.1:709	Endogenous	mRNA	100	12.28	3.09	4.13	2.89	4.03	3.4	3.75
Myb		NM_010848.3	NM_010848.3:1744	Endogenous	mRNA	100	10.78	3.09	3.83	3.59	3.22	3.4	3.33
Myc		NM_010849.4	NM_010849.4:630	Endogenous	mRNA	100	399.27	8.55	8.77	8.74	8.62	8.42	8.71
Mycn		NM_008709.3	NM_008709.3:2080	Endogenous	mRNA	100	41.37	5.9	5.72	5.77	4.8	4.87	4.6
Myd88		NM_010851.2	NM_010851.2:1595	Endogenous	mRNA	100	315.54	8.4	8.39	8.49	7.93	8.2	8.34
Nasp		NM_001081475.1	NM_001081475.1:1118	Endogenous	mRNA	100	541.85	8.81	8.92	9.19	9.45	8.89	9.12
Nbn		NM_013752.3	NM_013752.3:1000	Endogenous	mRNA	100	151.7	6.88	7.19	7.1	7.54	7.3	7.37
Ncor1		NM_011308.2	NM_011308.2:211	Endogenous	mRNA	100	297.01	8.2	8.2	8.25	8.29	8.22	8.12
Nf1		NM_010897.2	NM_010897.2:2705	Endogenous	mRNA	100	113.93	7.01	6.49	6.77	6.79	7.05	6.82
Nf2		NM_001252252.1	NM_001252252.1:2016	Endogenous	mRNA	100	303.69	8.39	8.19	8.23	8.08	8.3	8.27
Nfatc1		NM_016791.4	NM_016791.4:1570	Endogenous	mRNA	100	48	5.9	5.91	5.89	4.92	5.13	5.45
Nfe2l2		NR_132727.1	NR_132727.1:144	Endogenous	mRNA	100	91.66	6.7	6.67	6.87	6.22	6.18	6.33
Nfkb1		NM_008689.2	NM_008689.2:2125	Endogenous	mRNA	100	225.21	7.94	8.09	8.08	7.36	7.62	7.66
Nfkbia		NM_010907.1	NM_010907.1:940	Endogenous	mRNA	100	990.4	9.96	10.13	10.08	9.78	9.56	10.12
Nfkbiz		NM_030612.1	NM_030612.1:1305	Endogenous	mRNA	100	181.08	7.26	7.89	7.54	7.43	7.3	7.49
Ngf		NM_001112698.1	NM_001112698.1:630	Endogenous	mRNA	100	15.95	4.17	4.3	4.41	3.39	3.69	3.75
Ngfr		NM_033217.3	NM_033217.3:1995	Endogenous	mRNA	100	20.92	4.83	4.22	4.21	3.68	4.62	4.5
Nkd1		NM_027280.3	NM_027280.3:2305	Endogenous	mRNA	100	21	4.56	4.94	4.14	3.92	4.47	4.07
Nodal		NM_013611.4	NM_013611.4:1975	Endogenous	mRNA	100	5.94	0.92	3.3	1.89	2.8	3.03	2.33
Nog		NM_008711.2	NM_008711.2:895	Endogenous	mRNA	100	13.28	3.62	3.3	4.53	3.68	3.81	2.92
Nos3		NM_008713.4	NM_008713.4:3613	Endogenous	mRNA	100	26.89	5.17	4.72	4.64	4.74	4.81	4.27
Notch1		NM_008714.2	NM_008714.2:1425	Endogenous	mRNA	100	226.96	7.88	8.23	8.11	7.4	7.2	7.86
Notch2		NM_010928.1	NM_010928.1:5110	Endogenous	mRNA	100	150	7.49	7.55	7.29	6.73	6.88	7.25
Notch3		NM_008716.2	NM_008716.2:550	Endogenous	mRNA	100	37.94	5.35	5.52	5.28	4.86	5.03	5.33
Npm1		NM_008722.2	NM_008722.2:657	Endogenous	mRNA	100	5202.09	12.04	12.32	12.28	12.72	12.16	12.45
Npm2		NM_181345.3	NM_181345.3:190	Endogenous	mRNA	100	7.28	2.5	3.13	2.7	1.8	3.55	2.92
Nr4a1		NM_010444.1	NM_010444.1:1315	Endogenous	mRNA	100	45.75	5.31	5.86	5.82	5.31	4.93	5.65
Nr4a3		NM_015743.3	NM_015743.3:1640	Endogenous	mRNA	100	7.36	3.62	2.94	2.21	2.22	3.03	2.75
Nras		NM_010937.2	NM_010937.2:3665	Endogenous	mRNA	100	391.46	8.74	8.69	8.79	8.56	8.24	8.59
Nsd1		NM_008739.3	NM_008739.3:5035	Endogenous	mRNA	100	288.87	8.18	8.19	8.28	8.29	8.03	8.06
Ntf3		NM_008742.2	NM_008742.2:305	Endogenous	mRNA	100	6.6	1.5	3.45	3.21	2.22	1.81	3.07
Nthl1		NM_008743.2	NM_008743.2:34	Endogenous	mRNA	100	40.24	4.96	5.3	4.75	5.77	5.31	5.63
Ntrk1		NM_001033124.1	NM_001033124.1:1481	Endogenous	mRNA	100	5.46	1.92	2.45	3.06	2.54	1.81	2.55
Ntrk2		NM_001025074.1	NM_001025074.1:1345	Endogenous	mRNA	100	98.29	7.36	6.38	6.41	6.13	6.65	6.43
Numbl		NM_010950.2	NM_010950.2:443	Endogenous	mRNA	100	40.68	5.41	5.62	5.84	5.13	4.81	4.99
Nupr1		NM_019738.1	NM_019738.1:375	Endogenous	mRNA	100	429.55	8.84	8.84	8.72	8.48	8.77	8.8
Osm		NM_001013365.2	NM_001013365.2:579	Endogenous	mRNA	100	41.21	5.41	4.99	5.31	5.26	5.47	5.65
Pak3		NM_001195046.1	NM_001195046.1:7304	Endogenous	mRNA	100	28.57	4.92	5.56	5.1	4.22	4.4	4.33
Pak7		NM_172858.2	NM_172858.2:2442	Endogenous	mRNA	100	9.4	3.38	3.72	2.21	2.54	3.81	3.07
Pax3		NM_001159520.1	NM_001159520.1:731	Endogenous	mRNA	100	6.54	1.5	2.72	2.7	2.8	3.4	2.55
Pax5		NM_008782.2	NM_008782.2:90	Endogenous	mRNA	100	7.57	3.5	3.3	1.89	3.22	2.81	2.07
Pax8		NM_011040.4	NM_011040.4:1664	Endogenous	mRNA	100	14.36	3.62	3.13	3.89	4.03	4.03	4.14
Pbrm1		NM_001081251.1	NM_001081251.1:5160	Endogenous	mRNA	100	214.87	7.49	7.8	7.71	7.86	7.67	7.91
Pbx1		NM_008783.2	NM_008783.2:951	Endogenous	mRNA	100	135.89	7.03	7.34	7.21	6.79	6.73	7.3
Pbx3		NM_016768.1	NM_016768.1:1430	Endogenous	mRNA	100	77.88	6.39	6.49	6.53	6.08	5.95	6.16
Pck1		NM_011044.2	NM_011044.2:1045	Endogenous	mRNA	100	96.26	6.26	5.3	3.98	6.22	8.25	6.07
Pcna		NM_011045.2	NM_011045.2:590	Endogenous	mRNA	100	2058.08	10.85	10.85	10.83	11.28	11.09	11.08
Pdgfa		NM_008808.3	NM_008808.3:805	Endogenous	mRNA	100	302.39	8.27	8.62	8.7	7.8	7.66	8.09
Pdgfb		NM_011057.3	NM_011057.3:2325	Endogenous	mRNA	100	138.97	7.35	7.35	7.57	6.73	6.47	6.93
Pdgfc		NM_019971.2	NM_019971.2:1165	Endogenous	mRNA	100	686.35	9.23	9.34	9.56	9.65	9.34	9.38
Pdgfd		NM_027924.2	NM_027924.2:156	Endogenous	mRNA	100	58.99	6.13	6.06	5.84	5.83	6.06	5.17
Pdgfra		NM_001083316.1	NM_001083316.1:2520	Endogenous	mRNA	100	410.49	9.23	8.82	8.96	7.94	8.41	8.34
Pdgfrb		NM_008809.1	NM_008809.1:1185	Endogenous	mRNA	100	41.18	5.73	6.09	5.02	5.03	5.03	4.83
Pgf		NM_008827.2	NM_008827.2:465	Endogenous	mRNA	100	33.64	5.28	5.3	5.21	5.13	4.69	4.7
Phf6		NM_027642.1	NM_027642.1:2050	Endogenous	mRNA	100	163.31	7.36	7.18	7.41	7.63	6.95	7.48
Pias1		NM_019663.3	NM_019663.3:1290	Endogenous	mRNA	100	61.74	5.8	6.2	6.04	5.95	5.55	6.07
Pik3ca		NM_008839.1	NM_008839.1:1255	Endogenous	mRNA	100	416.96	8.73	8.73	8.72	8.85	8.53	8.63
Pik3cb		NM_029094.3	NM_029094.3:1970	Endogenous	mRNA	100	497.28	9.06	9.15	9.04	8.7	8.75	8.99
Pik3cd		XM_003945690.1	XM_003945690.1:4648	Endogenous	mRNA	100	102.41	6.93	6.85	7.15	6.41	6.2	6.25
Pik3cg		NM_020272.2	NM_020272.2:2890	Endogenous	mRNA	100	95.07	6.86	6.47	6.72	6.29	6.65	6.35
Pik3r1		NM_001024955.1	NM_001024955.1:5664	Endogenous	mRNA	100	637.88	9.4	8.67	8.93	9.52	9.69	9.44
Pik3r2		NM_008841.2	NM_008841.2:230	Endogenous	mRNA	100	262.65	8.14	8.13	8.13	7.85	7.9	8.04
Pik3r3		NM_181585.5	NM_181585.5:3090	Endogenous	mRNA	100	104.05	6.78	6.94	7.06	6.71	5.78	6.63
Pik3r5		NM_177320.2	NM_177320.2:3342	Endogenous	mRNA	100	57.07	6.03	5.99	5.62	5.47	5.93	5.9
Pim1		NM_008842.3	NM_008842.3:365	Endogenous	mRNA	100	85.6	6.59	6.61	6.78	5.86	6.18	6.3
Pitx2		NM_001042502.1	NM_001042502.1:1381	Endogenous	mRNA	100	8.65	3.24	3.3	2.47	3.03	3.4	3.07
Pkmyt1		NM_023058.3	NM_023058.3:322	Endogenous	mRNA	100	37.19	5.17	5.34	5.1	5.22	5.23	5.24
Pla1a		NM_134102.2	NM_134102.2:695	Endogenous	mRNA	100	151.19	7.35	7.58	6.67	6.82	7.38	7.42
Pla2g10		NM_011987.2	NM_011987.2:730	Endogenous	mRNA	100	4.19	1.92	2.94	0.89	2.22	2.23	1.33
Pla2g2a		NM_001082531.1	NM_001082531.1:220	Endogenous	mRNA	100	7.58	2.92	1.72	1.89	3.22	3.03	3.75
Pla2g3		NM_172791.2	NM_172791.2:2310	Endogenous	mRNA	100	7.13	3.09	2.45	3.47	3.03	2.81	1.33
Pla2g4a		NM_008869.2	NM_008869.2:1525	Endogenous	mRNA	100	94.69	6.28	6.73	6.84	6.85	6.16	6.38
Pla2g4c		NM_001168504.1	NM_001168504.1:2452	Endogenous	mRNA	100	21.94	4.67	4.89	4.47	3.8	4.4	4.27
Pla2g4e		NM_177845.4	NM_177845.4:1016	Endogenous	mRNA	100	32.6	4.96	6.18	5.25	3.54	3.81	4.83
Pla2g4f		NM_001024145.2	NM_001024145.2:2002	Endogenous	mRNA	100	49.22	5.5	6.85	5.62	4.54	4.69	5.21
Pla2g5		NM_001122954.1	NM_001122954.1:1540	Endogenous	mRNA	100	6.78	2.24	4.04	3.06	2.22	1.23	2.07
Plat		NM_008872.1	NM_008872.1:645	Endogenous	mRNA	100	114.72	6.94	7	7.36	6.54	6.27	6.69
Plau		NM_008873.2	NM_008873.2:1950	Endogenous	mRNA	100	184.72	7.84	7.55	7.9	7.3	7.25	7.17
Plcb1		NM_019677.1	NM_019677.1:495	Endogenous	mRNA	100	106.29	7.07	6.67	6.53	6.76	7.01	6.17
Plcb4		NM_013829.2	NM_013829.2:242	Endogenous	mRNA	100	113.02	6.76	6.56	6.25	7.16	7.19	6.78
Plce1		NM_019588.2	NM_019588.2:5810	Endogenous	mRNA	100	56.99	6.35	6.01	5.67	5.58	5.9	5.24
Plcg2		NM_172285.1	NM_172285.1:978	Endogenous	mRNA	100	428.74	8.9	8.67	8.77	8.59	8.38	9.05
Pld1		NM_001164056.1	NM_001164056.1:520	Endogenous	mRNA	100	97.76	6.53	6.82	6.53	6.29	6.86	6.57
Pml		NM_008884.5	NM_008884.5:616	Endogenous	mRNA	100	208.62	7.86	7.72	7.81	7.27	7.77	7.72
Polb		NM_011130.2	NM_011130.2:734	Endogenous	mRNA	100	471.78	8.71	8.91	9.09	9.04	8.66	8.85
Pold1		NM_011131.3	NM_011131.3:3052	Endogenous	mRNA	100	23.14	3.24	4.78	5.02	4.8	4.69	3.99
Pold4		NM_027196.3	NM_027196.3:779	Endogenous	mRNA	100	322.48	8.23	8.62	8.33	8.29	8.27	8.23
Pole2		NM_011133.2	NM_011133.2:343	Endogenous	mRNA	100	218.19	7.78	7.73	7.82	8.03	7.44	7.75
Polr2d		NM_027002.3	NM_027002.3:630	Endogenous	mRNA	100	321.13	8.39	8.4	8.23	8.45	8.2	8.28
Polr2h		NM_145632.2	NM_145632.2:100	Endogenous	mRNA	100	389.75	8.41	8.56	8.64	8.92	8.45	8.6
Polr2j		NM_011293.2	NM_011293.2:70	Endogenous	mRNA	100	427.94	8.71	8.75	8.8	8.87	8.64	8.67
Pparg		NM_011146.1	NM_011146.1:1060	Endogenous	mRNA	100	46.76	6.53	4.22	4.84	5.47	6.08	4.83
Ppargc1a		NM_008904.2	NM_008904.2:690	Endogenous	mRNA	100	20.42	4.83	3.72	3.98	4.47	4.47	4.39
Ppp2cb		NM_017374.3	NM_017374.3:1399	Endogenous	mRNA	100	431.88	8.8	8.94	8.89	8.67	8.47	8.71
Ppp2r1a		NM_016891.3	NM_016891.3:1559	Endogenous	mRNA	100	1005.87	9.87	10.16	10.14	9.76	9.84	10.03
Ppp2r2b		NM_028392.3	NM_028392.3:522	Endogenous	mRNA	100	6.55	3.24	2.45	2.7	1.22	3.4	2.33
Ppp2r2c		NM_172994.2	NM_172994.2:3352	Endogenous	mRNA	100	6.03	2.5	3.13	2.47	2.8	2.55	1.75
Ppp3ca		NM_008913.4	NM_008913.4:1675	Endogenous	mRNA	100	367.65	8.63	8.44	8.52	8.54	8.42	8.57
Ppp3cb		NM_008914.1	NM_008914.1:290	Endogenous	mRNA	100	491.26	9.02	8.84	9.03	9.06	8.73	8.94
Ppp3cc		NM_008915.2	NM_008915.2:1020	Endogenous	mRNA	100	153.05	7.04	7.12	7.03	7.62	7.41	7.24
Ppp3r1		NM_024459.2	NM_024459.2:1390	Endogenous	mRNA	100	994.21	9.95	9.94	10.06	10.04	9.9	9.85
Ppp3r2		NM_001004025.4	NM_001004025.4:1500	Endogenous	mRNA	100	5	2.73	2.45	3.21	2.22	1.23	0.75
Prdm1		NM_007548.3	NM_007548.3:1440	Endogenous	mRNA	100	95.25	6.79	7.41	6.9	5.83	5.55	6.09
Prkaa2		NM_178143.1	NM_178143.1:1890	Endogenous	mRNA	100	51.41	5.65	4.78	5.14	6.05	5.98	6.05
Prkaca		NM_008854.3	NM_008854.3:699	Endogenous	mRNA	100	348.21	8.52	8.51	8.46	8.25	8.48	8.41
Prkacb		NM_011100.3	NM_011100.3:3754	Endogenous	mRNA	100	244.4	8.06	7.94	8.07	7.77	7.76	7.96
Prkar1b		NM_008923.2	NM_008923.2:1595	Endogenous	mRNA	100	35.74	5.47	5.42	5.64	4.8	4.55	4.7
Prkar2a		NM_008924.2	NM_008924.2:2135	Endogenous	mRNA	100	456.54	8.89	8.95	8.87	8.74	8.78	8.76
Prkar2b		NM_011158.3	NM_011158.3:1405	Endogenous	mRNA	100	392.78	9.21	7.98	7.98	8.55	9.21	8.2
Prkca		NM_011101.3	NM_011101.3:6965	Endogenous	mRNA	100	62.82	6.28	5.65	6.04	5.83	5.93	6.03
Prkcb		NM_008855.2	NM_008855.2:8332	Endogenous	mRNA	100	120.43	7.39	6.78	6.71	6.39	7.08	6.93
Prkcg		NM_011102.3	NM_011102.3:1580	Endogenous	mRNA	100	8.41	3.24	3.3	3.21	2.54	3.23	2.75
Prkdc		NM_011159.2	NM_011159.2:3108	Endogenous	mRNA	100	100.77	6.75	6.62	6.47	6.52	6.9	6.62
Prkx		NM_016979.1	NM_016979.1:665	Endogenous	mRNA	100	287.53	8.43	8.45	8.47	7.68	7.81	7.94
Prl		NM_011164.1	NM_011164.1:115	Endogenous	mRNA	100	4.29	1.92	2.13	2.47	1.22	2.23	2.33
Prlr		NM_011169.5	NM_011169.5:1375	Endogenous	mRNA	100	344.52	7.97	6.82	7.68	8.72	9.27	8.85
Prmt8		NM_201371.1	NM_201371.1:1510	Endogenous	mRNA	100	6.2	1.5	2.72	2.89	2.22	3.03	2.92
ProcR		NM_011171.1	NM_011171.1:305	Endogenous	mRNA	100	215.47	8.06	8.18	7.95	7.03	7.53	7.43
Prom1		NM_001163577.1	NM_001163577.1:2605	Endogenous	mRNA	100	211.91	7.58	7.56	7.82	7.83	7.71	7.84
Ptch1		NM_008957.2	NM_008957.2:3400	Endogenous	mRNA	100	89.21	6.73	6.83	7.05	5.89	5.44	6.33
Ptcra		NM_011195.2	NM_011195.2:968	Endogenous	mRNA	83.33	4.39	0	3.13	1.89	1.8	1.81	2.55
Pten		NM_008960.2	NM_008960.2:5160	Endogenous	mRNA	100	556.73	9.09	9.36	9.36	9.09	8.88	8.86
Ptk2		NM_007982.2	NM_007982.2:1060	Endogenous	mRNA	100	177.73	7.43	7.42	7.6	7.34	7.52	7.52
Ptpn11		NM_011202.3	NM_011202.3:3710	Endogenous	mRNA	100	243.65	7.96	8.09	8.19	7.69	7.74	7.84
Ptpn5		NM_001163565.1	NM_001163565.1:2770	Endogenous	mRNA	100	16.07	3.62	4.04	3.79	4.13	3.69	4.55
Ptprr		NM_011217.2	NM_011217.2:2624	Endogenous	mRNA	100	7.08	2.73	2.72	3.21	2.54	2.55	3.07
Rac1		NM_009007.2	NM_009007.2:1045	Endogenous	mRNA	100	1463.23	10.69	10.55	10.61	10.35	10.36	10.49
Rac2		NM_009008.3	NM_009008.3:2258	Endogenous	mRNA	100	43.19	5.59	5.3	5.47	5.47	5.55	5.17
Rac3		NM_133223.4	NM_133223.4:440	Endogenous	mRNA	100	56.48	5.78	5.96	6	6.13	5.36	5.55
Rad21		NM_009009.4	NM_009009.4:1216	Endogenous	mRNA	100	1413.98	10.48	10.66	10.47	10.32	10.31	10.52
Rad50		NM_009012.2	NM_009012.2:4165	Endogenous	mRNA	100	106.64	6.78	6.7	6.59	6.88	6.78	6.68
Rad51		NM_011234.4	NM_011234.4:286	Endogenous	mRNA	100	135.93	6.99	6.93	6.6	7.45	7.19	7.22
Rad52		NM_001166381.1	NM_001166381.1:312	Endogenous	mRNA	100	91.73	6.5	6.32	6.46	6.73	6.55	6.53
Raf1		NM_029780.3	NM_029780.3:550	Endogenous	mRNA	100	484.99	8.95	8.98	8.92	8.97	8.81	8.9
Rasa4		NM_001039103.2	NM_001039103.2:1781	Endogenous	mRNA	100	20.77	4.5	5.04	4.28	3.68	4.13	4.27
Rasal1		NM_013832.4	NM_013832.4:1488	Endogenous	mRNA	100	45.7	5.17	4.78	5.38	5.65	5.9	5.9
Rasgrf1		NM_011245.2	NM_011245.2:158	Endogenous	mRNA	100	6.01	2.24	3.13	0.89	3.03	2.55	2.75
Rasgrf2		NM_009027.3	NM_009027.3:432	Endogenous	mRNA	100	32.21	6.22	3.59	4.28	4.61	4.98	4.96
Rasgrp1		NM_011246.2	NM_011246.2:2815	Endogenous	mRNA	100	22.88	4.73	4.83	4.06	4.31	4.31	4.7
Rasgrp2		NM_011242.2	NM_011242.2:580	Endogenous	mRNA	100	37.52	5.75	5.09	5.31	5.17	5.18	4.65
Rb1		NM_009029.2	NM_009029.2:1590	Endogenous	mRNA	100	1268.18	10.17	9.97	10.2	10.55	10.44	10.44
Rbx1		NM_019712.3	NM_019712.3:1040	Endogenous	mRNA	100	195.77	7.67	7.61	7.62	7.66	7.5	7.61
Rel		NM_009044.2	NM_009044.2:1290	Endogenous	mRNA	100	107.72	6.86	6.96	7	6.54	6.31	6.71
Rela		NM_009045.4	NM_009045.4:645	Endogenous	mRNA	100	165.56	7.44	7.49	7.64	7.11	7.19	7.28
Reln		NM_011261.2	NM_011261.2:2545	Endogenous	mRNA	100	16.18	3.83	4.45	3.98	4.31	3.69	3.65
Ret		NM_001080780.1	NM_001080780.1:5175	Endogenous	mRNA	100	68.06	5.05	3.83	4.53	6.88	6.91	6.64
Rfc3		NM_027009.2	NM_027009.2:1014	Endogenous	mRNA	100	85.98	6.19	6.34	6.41	6.66	6.49	6.42
Rfc4		NM_145480.1	NM_145480.1:230	Endogenous	mRNA	100	102.18	6.41	6.54	6.25	7.35	6.6	6.63
Rhoa		NM_016802.4	NM_016802.4:1885	Endogenous	mRNA	100	2027.13	11.07	11.09	11.09	10.8	10.86	10.97
Rin1		NM_145495.2	NM_145495.2:3820	Endogenous	mRNA	100	15.57	3.83	3.94	4.53	3.54	3.81	3.92
Rnf43		NM_172448.3	NM_172448.3:3395	Endogenous	mRNA	100	56.3	5.56	5.72	5.98	6.03	5.81	5.75
Rpa3		NM_026632.4	NM_026632.4:0	Endogenous	mRNA	100	318.03	8.21	8.18	8.46	8.6	8.02	8.33
Rps27a		NM_024277.2	NM_024277.2:96	Endogenous	mRNA	100	10.52	3.73	4.04	2.47	3.39	3.03	3.21
Rps6ka5		NM_153587.2	NM_153587.2:2755	Endogenous	mRNA	100	73.2	5.35	5.89	6.04	6.74	6.36	6.4
Rps6ka6		NM_025949.2	NM_025949.2:2415	Endogenous	mRNA	100	64.74	5.75	6.36	6.46	6.05	5.47	5.75
Rras2		NM_025846.2	NM_025846.2:1865	Endogenous	mRNA	100	446.31	8.84	9.02	8.89	8.79	8.32	8.85
Runx1		NM_001111021.1	NM_001111021.1:3055	Endogenous	mRNA	100	984.66	10.16	10.36	10.28	9.42	9.28	9.82
Runx1t1		NM_001111026.1	NM_001111026.1:5295	Endogenous	mRNA	100	17.54	3.24	4.38	4.14	4.61	4.23	3.83
Rxrg		NM_001159731.1	NM_001159731.1:1474	Endogenous	mRNA	100	6.36	2.73	1.72	2.47	3.54	3.23	0.75
Setbp1		NM_053099.2	NM_053099.2:5630	Endogenous	mRNA	100	46.81	5.78	6.13	5.87	4.13	5.23	5.42
Setd2		NM_001081340.2	NM_001081340.2:1345	Endogenous	mRNA	100	414.51	8.79	8.65	8.53	8.76	8.58	8.83
Sf3b1		NM_031179.2	NM_031179.2:65	Endogenous	mRNA	100	343.57	8.47	8.39	8.42	8.6	8.12	8.5
Sfn		NM_018754.2	NM_018754.2:42	Endogenous	mRNA	100	10.67	3.62	3.94	3.59	3.03	2.81	3.21
Sfrp1		NM_013834.2	NM_013834.2:2505	Endogenous	mRNA	100	292.81	8.68	8.47	8.59	7.45	7.5	7.96
Sfrp2		NM_009144.2	NM_009144.2:689	Endogenous	mRNA	100	142.5	7.09	6.78	8.21	6.77	6.27	6.98
Sfrp4		NM_016687.2	NM_016687.2:895	Endogenous	mRNA	100	154.76	7.78	7.28	7.3	6.61	6.99	7.42
Sgk2		NM_001291152.1	NM_001291152.1:478	Endogenous	mRNA	100	5.5	2.73	3.13	1.47	2.54	1.23	2.75
Shc1		NM_011368.4	NM_011368.4:235	Endogenous	mRNA	100	243	8.14	7.97	7.91	7.89	7.77	7.84
Shc2		NM_001024539.1	NM_001024539.1:2716	Endogenous	mRNA	100	41.97	5.65	5.78	5.28	4.92	5.36	5.21
Shc3		NM_009167.3	NM_009167.3:830	Endogenous	mRNA	83.33	3.27	0	1.13	2.47	2.22	0.23	2.33
Shc4		NM_199022.2	NM_199022.2:2944	Endogenous	mRNA	100	24.6	4.31	4.94	4.14	4.74	4.55	4.88
Sin3a		NM_001110350.1	NM_001110350.1:3585	Endogenous	mRNA	100	227	8.01	7.71	7.74	7.8	7.77	7.91
Sirt4		XM_485674.5	XM_485674.5:565	Endogenous	mRNA	100	35.19	5.05	5.34	4.98	5.13	5.13	5.17
Six1		NM_009189.2	NM_009189.2:2291	Endogenous	mRNA	100	16.04	4.78	4.65	3.35	2.8	4.03	3.33
Skp1a		NM_011543.4	NM_011543.4:490	Endogenous	mRNA	100	1745.55	10.81	10.87	10.83	10.74	10.62	10.73
Skp2		NM_013787.2	NM_013787.2:790	Endogenous	mRNA	100	37.54	4.83	5.42	5.21	5.22	4.93	5.63
Smad1		NM_008539.3	NM_008539.3:240	Endogenous	mRNA	100	185.99	7.42	7.79	7.61	7.66	7.01	7.62
Smad2		NM_010754.4	NM_010754.4:880	Endogenous	mRNA	100	85.26	6.28	6.61	6.36	6.49	6.34	6.39
Smad3		NM_016769.3	NM_016769.3:1845	Endogenous	mRNA	100	237.62	7.76	7.85	7.88	7.95	7.92	7.99
Smad4		NM_008540.2	NM_008540.2:2885	Endogenous	mRNA	100	324.42	8.31	8.4	8.51	8.36	8.15	8.3
Smad9		NM_019483.4	NM_019483.4:2573	Endogenous	mRNA	100	11.56	3.73	3.83	3.98	4.03	1.23	2.92
Smarca4		NM_011417.2	NM_011417.2:3540	Endogenous	mRNA	100	417.37	8.8	8.97	8.75	8.45	8.44	8.75
Smarcb1		NM_001161853.1	NM_001161853.1:216	Endogenous	mRNA	100	104.81	6.81	6.99	6.95	6.39	6.49	6.51
Smc1a		NM_019710.2	NM_019710.2:388	Endogenous	mRNA	100	575.27	9.13	9.14	9.13	9.19	9.2	9.22
Smc1b		NM_080470.1	NM_080470.1:1866	Endogenous	mRNA	100	5.79	1.5	2.72	2.7	3.39	2.55	1.33
Smc3		NM_007790.3	NM_007790.3:1885	Endogenous	mRNA	100	630.51	9.26	9.26	9.22	9.5	9.19	9.36
Smo		NM_176996.4	NM_176996.4:1430	Endogenous	mRNA	100	52.95	5.56	6.11	5.62	5.58	5.55	5.85
Snai1		NM_011427.2	NM_011427.2:910	Endogenous	mRNA	100	36.62	5.17	5.38	5.7	5.03	5.13	4.5
Socs1		NM_009896.2	NM_009896.2:1020	Endogenous	mRNA	100	46.57	6.2	5.62	5.62	5.58	4.75	5.03
Socs2		NM_001168655.1	NM_001168655.1:626	Endogenous	mRNA	100	228.65	8.07	8.3	8.19	7.37	7.08	7.6
Socs3		NM_007707.2	NM_007707.2:585	Endogenous	mRNA	100	55.15	6.01	6.22	6.14	5.39	4.93	5.63
Sos1		NM_009231.2	NM_009231.2:6002	Endogenous	mRNA	100	190.76	7.41	7.69	7.58	7.48	7.64	7.63
Sos2		NM_001135559.1	NM_001135559.1:1180	Endogenous	mRNA	100	146.83	7.33	7.24	7.36	7.14	7.03	7.05
Sost		NM_024449.4	NM_024449.4:975	Endogenous	mRNA	100	12.51	3.5	3.45	3.79	4.47	2.55	3.45
Sox17		NM_011441.4	NM_011441.4:2150	Endogenous	mRNA	100	23.79	4.5	4.78	4.84	4.22	4.75	4.21
Sox9		NM_011448.4	NM_011448.4:3540	Endogenous	mRNA	100	220.34	7.59	7.54	7.62	8.01	7.74	8.09
Sp1		NM_013672.2	NM_013672.2:6580	Endogenous	mRNA	100	251.38	7.9	8.26	8.03	7.95	7.8	7.85
Spop		NM_025287.2	NM_025287.2:2525	Endogenous	mRNA	100	184.11	7.55	7.81	7.57	7.35	7.42	7.4
Spp1		NM_009263.3	NM_009263.3:420	Endogenous	mRNA	100	60185.3	15.13	15.02	15.55	16.33	16.59	15.94
Spry1		NM_011896.2	NM_011896.2:1610	Endogenous	mRNA	100	57.35	5.96	6.52	5.93	5.58	5.08	5.55
Spry2		NM_011897.3	NM_011897.3:1076	Endogenous	mRNA	100	166.44	7.47	7.66	7.38	7.4	6.8	7.43
Spry4		NM_011898.2	NM_011898.2:1726	Endogenous	mRNA	100	64.89	6.01	6.26	6.06	5.92	5.93	5.92
Srsf2		NM_011358.2	NM_011358.2:1530	Endogenous	mRNA	100	2022.11	10.98	10.97	10.91	11.07	10.92	11.03
Stag2		NM_001077712.1	NM_001077712.1:565	Endogenous	mRNA	100	643.49	9.24	9.19	9.2	9.74	9.27	9.27
Stat1		NM_009283.3	NM_009283.3:1590	Endogenous	mRNA	100	288.77	8.9	7.93	8.38	7.58	7.86	7.99
Stat3		NM_213659.2	NM_213659.2:2130	Endogenous	mRNA	100	1462.63	10.46	10.55	10.66	10.32	10.48	10.59
Stat4		NM_011487.4	NM_011487.4:1816	Endogenous	mRNA	100	15.49	3.92	3.83	3.89	3.8	4.03	4.21
Stk11		NM_011492.3	NM_011492.3:395	Endogenous	mRNA	100	571.74	9.14	9.07	8.94	9.2	9.38	9.19
Stk4		NM_021420.3	NM_021420.3:730	Endogenous	mRNA	100	213.38	7.78	7.98	7.89	7.58	7.44	7.69
Stmn1		NM_019641.3	NM_019641.3:595	Endogenous	mRNA	100	2082.65	10.82	10.96	10.93	11.33	10.75	11.25
Sufu		NM_001025391.1	NM_001025391.1:465	Endogenous	mRNA	100	221.32	7.81	7.75	7.9	7.83	7.42	7.97
Suv39h2		NM_022724.3	NM_022724.3:815	Endogenous	mRNA	100	70.2	5.67	6.38	5.84	6.17	6.46	6.12
Syk		NM_011518.2	NM_011518.2:3970	Endogenous	mRNA	100	229.05	8.02	8.11	8.12	7.49	7.48	7.65
Tbl1xr1		NM_030732.3	NM_030732.3:4665	Endogenous	mRNA	100	192.57	7.52	7.74	7.79	7.58	7.35	7.51
Tcf3		NM_001164147.1	NM_001164147.1:3080	Endogenous	mRNA	100	9.1	2.5	3.45	3.47	3.54	3.23	2.55
Tcf7l1		NM_001079822.2	NM_001079822.2:2570	Endogenous	mRNA	100	35.08	5.44	4.65	5.47	5.08	4.87	5.1
Tet2		NM_001040400.2	NM_001040400.2:2485	Endogenous	mRNA	100	112.08	6.5	7.04	7.1	6.58	6.42	7.05
Tfdp1		NM_009361.2	NM_009361.2:132	Endogenous	mRNA	100	1086.96	10.12	10.15	10.15	10.16	9.84	10.07
Tgfb1		NM_011577.1	NM_011577.1:1470	Endogenous	mRNA	100	481.9	9.18	9.25	9.23	8.22	8.48	8.81
Tgfb2		NM_009367.1	NM_009367.1:1685	Endogenous	mRNA	100	162.99	6.8	6.4	7.08	7.82	7.72	7.72
Tgfb3		NM_009368.2	NM_009368.2:2410	Endogenous	mRNA	100	420.68	8.74	8.63	8.95	8.34	8.67	8.9
Tgfbr1		NM_009370.2	NM_009370.2:4425	Endogenous	mRNA	100	645.55	9.29	9.36	9.37	9.35	9.3	9.34
Tgfbr2		NM_009371.2	NM_009371.2:475	Endogenous	mRNA	100	755.54	9.9	9.51	9.76	8.91	9.49	9.61
Thbs1		NM_011580.3	NM_011580.3:3	Endogenous	mRNA	100	261.98	7.75	8.26	8.32	7.78	7.91	8.09
Thbs4		NM_011582.3	NM_011582.3:1128	Endogenous	mRNA	100	11.89	4.09	4.22	3.35	2.8	3.93	1.75
Them4		NM_029431.1	NM_029431.1:360	Endogenous	mRNA	100	96.31	6.46	7.01	6.84	6.65	6.08	6.28
Tiam1		NM_009384.2	NM_009384.2:7055	Endogenous	mRNA	100	200.89	7.61	8.15	8.07	7.36	6.88	7.45
Tlr2		NM_011905.2	NM_011905.2:255	Endogenous	mRNA	100	69.51	6.2	6.09	6.21	5.77	6.2	6.19
Tlr4		NM_021297.2	NM_021297.2:2510	Endogenous	mRNA	100	281.18	8.23	8.01	8.12	8.34	8.01	8.07
Tlx1		NM_021901.3	NM_021901.3:1146	Endogenous	mRNA	100	5.08	1.5	2.13	2.89	2.54	2.55	2.07
Tmprss2		NM_015775.2	NM_015775.2:2500	Endogenous	mRNA	100	70.64	5.96	6.26	5.64	6.39	6.27	6.21
Tnc		NM_011607.1	NM_011607.1:5665	Endogenous	mRNA	100	2390.61	11.29	12.03	12.2	9.71	8.99	10.65
Tnf		NM_013693.1	NM_013693.1:1135	Endogenous	mRNA	100	22.28	4.56	4.59	4.93	4.54	3.69	4.27
Tnfaip3		NM_009397.2	NM_009397.2:232	Endogenous	mRNA	100	142.67	7.13	7.57	7.38	6.7	6.72	7.23
Tnfrsf10b		NM_020275.3	NM_020275.3:1625	Endogenous	mRNA	100	63.16	6.03	6.36	5.89	5.35	5.81	6.24
Tnfsf10		NM_009425.2	NM_009425.2:2055	Endogenous	mRNA	100	81.82	6.62	6.15	6.55	6.49	6.2	6.01
Tnn		NM_177839.2	NM_177839.2:4655	Endogenous	mRNA	100	12.66	3.62	4.3	4.41	3.39	2.23	2.92
Tnr		NM_022312.3	NM_022312.3:5290	Endogenous	mRNA	100	10.68	3.24	3.59	3.59	3.54	3.4	3.07
Top2a		NM_011623.2	NM_011623.2:1953	Endogenous	mRNA	100	664.29	9.29	9.56	9.37	9.57	8.97	9.41
Tpo		NM_009417.2	NM_009417.2:688	Endogenous	mRNA	100	6.53	3.38	2.45	1.47	3.03	3.03	2.07
Traf7		NM_153792.1	NM_153792.1:1780	Endogenous	mRNA	100	333.83	8.46	8.64	8.61	8.16	8.02	8.31
Trp53		NM_011640.1	NM_011640.1:1835	Endogenous	mRNA	100	106.42	6.8	6.99	6.82	6.45	6.62	6.66
Tsc1		NM_022887.3	NM_022887.3:4645	Endogenous	mRNA	100	88.89	6.59	6.3	6.57	6.49	6.4	6.47
Tsc2		NM_001039363.1	NM_001039363.1:1554	Endogenous	mRNA	100	89.96	6.75	6.73	6.47	6.29	6.18	6.43
Tshr		NM_001113404.1	NM_001113404.1:581	Endogenous	mRNA	100	66.06	7.22	4.89	3.79	5.47	6.88	5.36
Tslp		NM_021367.1	NM_021367.1:638	Endogenous	mRNA	100	28.72	5.2	4.3	4.93	5.03	4.69	4.75
Tspan7		NM_019634.2	NM_019634.2:670	Endogenous	mRNA	100	163.46	7.2	7.59	7.54	7.11	7.35	7.27
Ttk		NM_009445.2	NM_009445.2:1290	Endogenous	mRNA	100	74.61	6.07	6.32	5.91	6.7	5.75	6.38
U2af1		NM_001163769.1	NM_001163769.1:750	Endogenous	mRNA	100	1353.32	10.42	10.33	10.37	10.48	10.28	10.52
Ubb		NM_011664.3	NM_011664.3:251	Endogenous	mRNA	100	13943.8	13.77	13.76	13.77	13.73	13.73	13.83
Ube2t		NM_001278115.1	NM_001278115.1:348	Endogenous	mRNA	100	72.76	5.5	6.04	5.79	6.85	6.29	6.25
Uty		NM_009484.2	NM_009484.2:3530	Endogenous	mRNA	100	8.82	3.38	3.3	2.7	3.22	3.93	0.75
Vegfa		NM_001025250.3	NM_001025250.3:3015	Endogenous	mRNA	100	205.58	7.56	7.87	7.76	7.5	7.83	7.51
Vegfb		NM_011697.2	NM_011697.2:1110	Endogenous	mRNA	100	250.4	8.19	7.61	7.68	7.91	8.29	8.01
Vegfc		NM_009506.2	NM_009506.2:1320	Endogenous	mRNA	100	76.54	6.33	6.64	6.66	5.58	5.87	6.17
Vhl		NM_009507.3	NM_009507.3:820	Endogenous	mRNA	100	36.08	5.5	5.09	5.21	5.47	4.98	4.6
Wee1		NM_009516.3	NM_009516.3:845	Endogenous	mRNA	100	65.64	5.75	5.89	5.5	6.47	6.11	6.28
Whsc1		NM_001081102.2	NM_001081102.2:890	Endogenous	mRNA	100	402.5	8.45	8.63	8.79	8.8	8.61	8.6
Whsc1l1		NM_001001735.1	NM_001001735.1:670	Endogenous	mRNA	100	635.18	9.32	9.34	9.41	9.34	9.16	9.29
Wif1		NM_011915.1	NM_011915.1:620	Endogenous	mRNA	100	288.67	8.41	9.13	8.46	7.11	6.93	7.77
Wnt1		NM_021279.4	NM_021279.4:2188	Endogenous	mRNA	100	3.97	2.24	1.72	2.21	2.54	0.23	2.07
Wnt10a		NM_009518.1	NM_009518.1:2321	Endogenous	mRNA	100	32.66	4.67	6.01	5.67	4.54	3.03	4.55
Wnt10b		NM_011718.1	NM_011718.1:1750	Endogenous	mRNA	100	34.82	5.65	5.99	5.06	4.03	4.47	4.55
Wnt11		NM_001285792.1	NM_001285792.1:1782	Endogenous	mRNA	100	65.3	6.76	6.59	6.44	4.31	4.62	5.79
Wnt16		NM_053116.3	NM_053116.3:75	Endogenous	mRNA	100	12.47	3.5	3.83	3.89	3.39	3.4	3.75
Wnt2		NM_023653.4	NM_023653.4:1335	Endogenous	mRNA	100	17.72	4.01	4.38	4.41	3.39	4.13	4.33
Wnt2b		NM_009520.3	NM_009520.3:1895	Endogenous	mRNA	100	7.57	3.09	2.72	3.06	3.39	3.03	1.75
Wnt3		NM_009521.2	NM_009521.2:1046	Endogenous	mRNA	100	15.78	3.5	5.3	4.35	3.54	1.81	3.07
Wnt3a		NM_009522.2	NM_009522.2:1279	Endogenous	mRNA	100	7.11	2.5	3.3	2.89	2.54	3.4	1.75
Wnt4		NM_009523.1	NM_009523.1:64	Endogenous	mRNA	100	7.47	1.5	3.72	3.06	2.8	3.23	2.07
Wnt5a		NM_009524.2	NM_009524.2:3020	Endogenous	mRNA	100	393.52	8.73	9.42	9.04	7.85	7.78	8.1
Wnt5b		NM_009525.3	NM_009525.3:1464	Endogenous	mRNA	100	74.16	5.9	5.49	6.28	6.5	6.38	6.47
Wnt6		NM_009526.3	NM_009526.3:1715	Endogenous	mRNA	100	33.42	5.24	5.65	5.64	4.03	4.55	4.5
Wnt7a		NM_009527.3	NM_009527.3:1965	Endogenous	mRNA	100	4.93	2.5	2.13	3.06	2.22	1.23	2.07
Wnt7b		NM_009528.2	NM_009528.2:1782	Endogenous	mRNA	100	18.66	4.09	4.3	4.53	4.22	4.13	3.99
Wt1		NM_144783.2	NM_144783.2:406	Endogenous	mRNA	100	16.41	3.92	4.04	3.89	4.47	4.31	3.33
Xpa		NM_011728.2	NM_011728.2:378	Endogenous	mRNA	100	163.61	7.38	7.41	7.09	7.73	7.45	6.95
Xpc		NM_009531.2	NM_009531.2:805	Endogenous	mRNA	100	13.51	3.62	4.13	3.89	3.39	3.55	3.83
Xrcc4		NM_028012.4	NM_028012.4:166	Endogenous	mRNA	100	123.1	7.1	6.8	6.75	6.95	6.88	7.14
Zak		NM_023057.5	NM_023057.5:976	Endogenous	mRNA	100	207.35	7.72	8.14	8.1	7.27	7.16	7.49
Zbtb16		NM_001033324.2	NM_001033324.2:4193	Endogenous	mRNA	100	63.17	5.47	5.62	5.06	6.74	6.84	4.92
Zbtb32		NM_021397.2	NM_021397.2:1108	Endogenous	mRNA	100	23.83	4.62	4.89	4.47	4.68	4.55	4.14
Zic2		NM_009574.3	NM_009574.3:1875	Endogenous	mRNA	100	2.78	1.5	0.13	2.47	1.22	1.23	1.33
Abcf1		NM_013854.1	NM_013854.1:875	Housekeeping	mRNA	100	224.79	7.79	7.87	7.71	7.62	7.82	8.03
Alas1		NM_020559.2	NM_020559.2:1034	Housekeeping	mRNA	100	92.28	6.88	6.2	6.82	6.35	6.47	6.3
Edc3		NM_153799.3	NM_153799.3:2570	Housekeeping	mRNA	100	94.72	6.38	6.79	6.55	6.77	6.36	6.49
Eef1g		NM_026007.4	NM_026007.4:338	Housekeeping	mRNA	100	3019.22	11.44	11.72	11.65	11.64	11.4	11.49
Eif2b4		NM_001127355.1	NM_001127355.1:1562	Housekeeping	mRNA	100	336.79	8.28	8.38	8.42	8.51	8.39	8.38
G6pdx		NM_008062.2	NM_008062.2:2030	Housekeeping	mRNA	100	452.74	9.02	9.01	8.83	8.39	8.88	8.72
Gusb		NM_010368.1	NM_010368.1:1735	Housekeeping	mRNA	100	724.82	9.52	9.48	9.5	9.25	9.66	9.58
Hdac3		NM_010411.2	NM_010411.2:144	Housekeeping	mRNA	100	477.71	8.8	8.61	8.63	9.21	8.95	9.1
Hprt		NM_013556.2	NM_013556.2:428	Housekeeping	mRNA	100	1801.28	10.89	10.78	10.78	10.93	10.7	10.79
Nubp1		NM_011955.2	NM_011955.2:284	Housekeeping	mRNA	100	140.21	6.95	6.95	7.01	7.31	7.37	7.15
Oaz1		NM_008753.4	NM_008753.4:809	Housekeeping	mRNA	100	4006.68	11.96	11.81	11.92	12.06	12.01	12.03
Polr1b		NM_009086.2	NM_009086.2:2795	Housekeeping	mRNA	100	81.55	6.2	6.69	6.6	6.24	6.36	5.85
Polr2a		NM_009089.2	NM_009089.2:2220	Housekeeping	mRNA	100	915.98	9.9	9.96	9.78	9.6	9.89	9.87
Ppia		NM_008907.1	NM_008907.1:390	Housekeeping	mRNA	100	4951.54	12.03	12.22	12.21	12.59	12.16	12.36
Rpl19		NM_009078.2	NM_009078.2:92	Housekeeping	mRNA	100	15367.3	13.79	13.82	13.82	14.16	13.92	13.9
Sap130		NM_172965.2	NM_172965.2:2182	Housekeeping	mRNA	100	169.56	7.47	7.59	7.36	6.88	7.49	7.53
Sdha		NM_023281.1	NM_023281.1:250	Housekeeping	mRNA	100	687.98	9.42	9.2	9.13	9.64	9.61	9.49
Sf3a3		NM_029157.3	NM_029157.3:40	Housekeeping	mRNA	100	331.09	8.39	8.36	8.43	8.44	8.16	8.43
Tbp		NM_013684.3	NM_013684.3:70	Housekeeping	mRNA	100	86.52	6.56	6.26	6.35	6.33	6.57	6.51
Tubb5		NM_011655.4	NM_011655.4:2260	Housekeeping	mRNA	100	547.8	9.2	9.21	9.43	8.99	8.74	8.91
NEG_A		ERCC_00096.1	ERCC_00096.1:230	Negative	SYSTEM	100	7.83	3.46	3.46	2.32	2.58	3.17	2.32
NEG_B		ERCC_00041.1	ERCC_00041.1:440	Negative	SYSTEM	100	4.5	2.32	1.58	3	2	2	1.58
NEG_C		ERCC_00019.1	ERCC_00019.1:140	Negative	SYSTEM	100	8.5	3	3.32	3.17	3.32	2	3.32
NEG_D		ERCC_00076.1	ERCC_00076.1:355	Negative	SYSTEM	100	7	3	2.58	3.58	3	1	2.58
NEG_E		ERCC_00098.1	ERCC_00098.1:785	Negative	SYSTEM	100	7.5	2.32	3.17	1.58	3.17	3	3.46
NEG_F		ERCC_00126.1	ERCC_00126.1:220	Negative	SYSTEM	100	9.33	3.58	2.58	3.46	2.58	3.32	3.46
NEG_G		ERCC_00144.1	ERCC_00144.1:15	Negative	SYSTEM	100	5.67	1.58	2.32	2.58	2	2.81	3.17
NEG_H		ERCC_00154.1	ERCC_00154.1:115	Negative	SYSTEM	100	5	2.32	2.58	2.81	1	2.81	1.58
POS_A		ERCC_00117.1	ERCC_00117.1:385	Positive	SYSTEM	100	15732	13.94	13.97	14.06	14.06	13.81	13.78
POS_B		ERCC_00112.1	ERCC_00112.1:695	Positive	SYSTEM	100	6420.5	12.63	12.65	12.79	12.75	12.53	12.52
POS_C		ERCC_00002.1	ERCC_00002.1:850	Positive	SYSTEM	100	2295.17	11.24	11.14	11.22	11.19	11.14	11.05
POS_D		ERCC_00092.1	ERCC_00092.1:540	Positive	SYSTEM	100	438.67	8.71	8.74	8.89	8.9	8.72	8.69
POS_E		ERCC_00035.1	ERCC_00035.1:485	Positive	SYSTEM	100	63	5.86	6.13	5.7	6.38	5.95	5.73
POS_F		ERCC_00034.1	ERCC_00034.1:195	Positive	SYSTEM	100	32.33	4.81	4.75	5.32	5.09	5	5.04

## Sheet: NanoString Raw counts
Probe Name	Annotation	Accession #	NS Probe ID	Class Name	Analyte Type	% Samples above Threshold	Avg Count	20200226_30102470320821-01_Control1_01.RCC	20200226_30102470320821-01_Control2_02.RCC	20200226_30102470320821-01_Control3_03.RCC	20200226_30102470320821-01_Knock-out1_04.RCC	20200226_30102470320821-01_Knock-out2_05.RCC	20200226_30102470320821-01_Knock-out3_06.RCC
								Control	Control	Control	YAP KO	YAP KO	YAP KO
Abl1		NM_009594.4	NM_009594.4:1378	Endogenous	mRNA	100	164.3	182.48	163.19	174.86	133.89	148.6	182.78
Acvr1b		NM_007395.3	NM_007395.3:1295	Endogenous	mRNA	100	317.91	341.32	346.09	349.72	271.28	291.36	307.7
Acvr1c		NM_001033369.3	NM_001033369.3:128	Endogenous	mRNA	100	24.51	38.76	19.71	12.03	18.63	38.61	19.28
Acvr2a		NM_007396.4	NM_007396.4:4680	Endogenous	mRNA	100	168.02	179.64	176.33	180.41	161.84	161.47	148.4
Akt1		NM_001165894.1	NM_001165894.1:898	Endogenous	mRNA	100	495.95	471.8	436.99	556.97	539.07	476.23	494.67
Akt2		NM_001110208.1	NM_001110208.1:2504	Endogenous	mRNA	100	115.87	127.64	124.85	134.15	100.13	99.46	108.99
Akt3		NM_011785.3	NM_011785.3:4625	Endogenous	mRNA	100	83.82	88.88	99.66	82.34	75.68	78.4	77.97
Alk		NM_007439.2	NM_007439.2:2218	Endogenous	mRNA	100	4.95	6.62	1.1	6.48	6.99	3.51	5.03
Alkbh2		NM_175016.2	NM_175016.2:630	Endogenous	mRNA	100	62.15	48.22	66.81	72.17	68.69	60.85	56.17
Alkbh3		NM_026944.1	NM_026944.1:354	Endogenous	mRNA	100	93.11	97.39	79.95	63.84	94.31	115.84	107.32
Amer1		NM_175179.4	NM_175179.4:4120	Endogenous	mRNA	100	108.03	118.19	87.62	87.89	118.76	109.99	125.76
Amh		NM_007445.2	NM_007445.2:355	Endogenous	mRNA	100	4.53	5.67	3.29	1.85	6.99	3.51	5.87
Angpt1		NM_009640.3	NM_009640.3:1350	Endogenous	mRNA	100	73	57.67	51.47	66.61	84.99	107.65	69.59
Angpt2		NM_007426.3	NM_007426.3:2020	Endogenous	mRNA	100	99.56	101.17	105.14	125.83	88.49	97.12	79.65
Ankrd1		NM_013468.3	NM_013468.3:1030	Endogenous	mRNA	100	38.74	44.44	51.47	34.23	33.76	25.74	42.76
Apc		NM_007462.3	NM_007462.3:645	Endogenous	mRNA	100	540.51	485.03	461.08	500.53	594.96	582.71	618.76
Aph1b		NM_177583.4	NM_177583.4:3320	Endogenous	mRNA	100	44.03	43.49	67.9	45.33	31.44	37.44	38.57
Ar		NM_013476.3	NM_013476.3:2215	Endogenous	mRNA	100	32.32	47.27	38.33	24.06	16.3	32.76	35.21
Areg		NM_009704.3	NM_009704.3:698	Endogenous	mRNA	100	51.73	44.44	105.14	59.21	31.44	31.59	38.57
Arid1a		NM_001080819.1	NM_001080819.1:7690	Endogenous	mRNA	100	392.36	376.3	473.13	438.54	326	372.09	368.07
Arid1b		NM_001085355.1	NM_001085355.1:2848	Endogenous	mRNA	100	135.95	163.57	157.71	157.28	88.49	111.16	137.5
Arid2		NM_175251.2	NM_175251.2:8010	Endogenous	mRNA	100	11.6	6.62	12.05	8.33	13.97	15.21	13.41
Arnt2		NM_007488.2	NM_007488.2:5710	Endogenous	mRNA	100	37.24	30.26	29.57	24.98	48.9	50.31	39.41
Asxl1		NM_001039939.1	NM_001039939.1:5760	Endogenous	mRNA	100	188.7	166.41	203.71	164.69	208.41	180.2	208.77
Atm		NM_007499.2	NM_007499.2:5543	Endogenous	mRNA	100	127.37	109.68	100.76	111.95	174.65	138.07	129.12
Atr		NM_019864.1	NM_019864.1:4392	Endogenous	mRNA	100	123.88	109.68	124.85	105.47	178.14	117.01	108.16
Atrx		NM_009530.2	NM_009530.2:980	Endogenous	mRNA	100	763.06	688.31	738.17	731.83	960.55	697.38	762.13
Axin1		NM_001159598.1	NM_001159598.1:2806	Endogenous	mRNA	100	79.95	69.97	95.28	99	71.02	86.59	57.85
Axin2		NM_015732.4	NM_015732.4:1120	Endogenous	mRNA	100	217.58	225.03	355.94	263.68	143.21	141.58	176.07
B2m		NM_009735.3	NM_009735.3:177	Endogenous	mRNA	100	9622.63	13946.9	7443.02	9668.31	6750.63	8740.69	11186.2
Bad		NM_007522.3	NM_007522.3:1146	Endogenous	mRNA	100	225.98	213.68	217.95	249.8	238.68	227	208.77
Baiap3		NM_001163270.1	NM_001163270.1:4004	Endogenous	mRNA	100	7.56	7.56	9.86	9.25	4.66	8.19	5.87
Bambi		NM_026505.2	NM_026505.2:684	Endogenous	mRNA	100	272.2	267.57	492.84	405.24	182.8	99.46	185.29
Bap1		NM_027088.2	NM_027088.2:3068	Endogenous	mRNA	100	30.76	32.15	30.67	35.16	20.96	36.27	29.34
Bax		NM_007527.3	NM_007527.3:735	Endogenous	mRNA	100	165.88	164.51	161	193.37	164.17	152.11	160.14
Bcl2		NM_009741.3	NM_009741.3:1844	Endogenous	mRNA	100	38.47	42.55	26.28	33.31	33.76	42.12	52.82
Bcl2a1a		NM_009742.3	NM_009742.3:175	Endogenous	mRNA	100	953.29	1003.16	841.12	1114.86	879.05	855.35	1026.23
Bcl2l1		NM_009743.4	NM_009743.4:200	Endogenous	mRNA	100	195.1	187.21	224.52	184.11	160.67	191.9	222.18
Bcor		NM_029510.3	NM_029510.3:6424	Endogenous	mRNA	100	62.33	67.13	67.9	63.84	59.38	50.31	65.4
Bdnf		NM_007540.4	NM_007540.4:3260	Endogenous	mRNA	100	40.03	34.04	46	46.26	41.91	40.95	31.02
Bid		NM_007544.3	NM_007544.3:1307	Endogenous	mRNA	100	193.67	206.12	203.71	247.03	211.9	114.67	178.58
Birc3		NM_007464.3	NM_007464.3:425	Endogenous	mRNA	100	223.66	267.57	257.37	224.82	183.96	191.9	216.31
Birc5		NM_009689.2	NM_009689.2:237	Endogenous	mRNA	100	218.23	177.75	187.28	210.02	321.35	167.33	245.66
Birc7		NM_001163247.1	NM_001163247.1:82	Endogenous	mRNA	100	17.8	13.24	20.81	16.65	19.79	18.72	17.61
Blm		NM_007550.3	NM_007550.3:4135	Endogenous	mRNA	100	48.11	33.09	52.57	48.11	52.39	47.97	54.5
Bmp2		NM_007553.2	NM_007553.2:885	Endogenous	mRNA	100	256.01	249.61	544.32	390.43	103.62	85.42	162.65
Bmp4		NM_007554.2	NM_007554.2:1500	Endogenous	mRNA	100	130.06	123.86	289.13	186.89	62.87	36.27	81.33
Bmp5		NM_007555.3	NM_007555.3:165	Endogenous	mRNA	100	6.97	4.73	6.57	12.03	9.31	5.85	3.35
Bmp6		NM_007556.2	NM_007556.2:2265	Endogenous	mRNA	100	19.21	19.86	23	29.61	8.15	18.72	15.93
Bmp7		NM_007557.2	NM_007557.2:690	Endogenous	mRNA	100	194.03	188.15	404.13	283.11	96.64	59.68	132.47
Bmp8a		NM_001256019.1	NM_001256019.1:2084	Endogenous	mRNA	100	14.34	17.02	15.33	23.13	11.64	10.53	8.38
Bmpr1b		NM_007560.3	NM_007560.3:2750	Endogenous	mRNA	100	8.58	6.62	15.33	10.18	6.99	8.19	4.19
Bnip3		NM_009760.4	NM_009760.4:1108	Endogenous	mRNA	100	356.93	476.53	318.71	255.35	399.36	449.32	242.3
Braf		NM_139294.5	NM_139294.5:1102	Endogenous	mRNA	100	169.31	200.44	187.28	177.64	132.73	150.94	166.85
Brca1		NM_009764.3	NM_009764.3:2027	Endogenous	mRNA	100	56.11	40.66	48.19	51.81	79.17	63.19	53.66
Brca2		NM_009765.3	NM_009765.3:1684	Endogenous	mRNA	100	65.31	62.4	66.81	48.11	91.98	59.68	62.88
Brip1		NM_178309.2	NM_178309.2:2388	Endogenous	mRNA	100	16.2	12.29	15.33	18.5	26.78	11.7	12.58
Cacna1c		NM_001159535.1	NM_001159535.1:1000	Endogenous	mRNA	100	13.29	16.07	14.24	15.73	13.97	10.53	9.22
Cacna1d		NM_028981.2	NM_028981.2:2935	Endogenous	mRNA	100	55.14	65.24	49.28	74.02	55.89	38.61	47.79
Cacna1e		NM_009782.3	NM_009782.3:4650	Endogenous	mRNA	100	4.62	3.78	2.19	5.55	4.66	2.34	9.22
Cacna1g		NM_001112813.2	NM_001112813.2:930	Endogenous	mRNA	100	20.1	20.8	26.28	19.43	26.78	16.38	10.9
Cacna1h		NM_021415.4	NM_021415.4:3212	Endogenous	mRNA	100	10.96	8.51	14.24	11.1	15.14	5.85	10.9
Cacna2d1		XM_006535618.1	XM_006535618.1:50	Endogenous	mRNA	100	29.72	24.58	27.38	45.33	31.44	21.06	28.51
Cacna2d2		NM_020263.3	NM_020263.3:1402	Endogenous	mRNA	100	13.04	9.45	18.62	9.25	16.3	12.87	11.74
Cacna2d3		NM_009785.1	NM_009785.1:696	Endogenous	mRNA	100	181.28	190.99	176.33	187.82	192.11	150.94	189.48
Cacna2d4		NM_001033382.2	NM_001033382.2:3672	Endogenous	mRNA	100	7	11.35	4.38	11.1	6.99	2.34	5.87
Cacnb2		NM_023116.3	NM_023116.3:735	Endogenous	mRNA	100	7.02	5.67	12.05	5.55	6.99	9.36	2.52
Cacnb3		NM_007581.2	NM_007581.2:2580	Endogenous	mRNA	100	179.45	190.99	217.95	174.86	176.97	153.28	162.65
Cacnb4		NM_146123.2	NM_146123.2:6510	Endogenous	mRNA	100	16.72	12.29	14.24	18.5	15.14	23.4	16.77
Cacng1		NM_007582.2	NM_007582.2:428	Endogenous	mRNA	100	6.28	2.84	7.67	4.63	6.99	10.53	5.03
Cacng4		NM_019431.2	NM_019431.2:524	Endogenous	mRNA	100	20.23	23.64	15.33	14.8	27.94	24.57	15.09
Cacng6		NM_133183.1	NM_133183.1:158	Endogenous	mRNA	100	5.94	5.67	5.48	4.63	4.66	9.36	5.87
Calml3		NM_027416.3	NM_027416.3:632	Endogenous	mRNA	100	1483.13	1394.59	2787.3	1554.33	861.58	1116.28	1184.69
Camk2b		NM_001174053.1	NM_001174053.1:2825	Endogenous	mRNA	100	8.39	5.67	12.05	5.55	9.31	9.36	8.38
Capn2		NM_009794.3	NM_009794.3:2124	Endogenous	mRNA	100	817.41	999.38	988.97	1020.49	540.24	643.56	711.82
Card11		NM_175362.2	NM_175362.2:545	Endogenous	mRNA	100	18.69	17.02	20.81	20.35	17.46	16.38	20.12
Casp12		NM_009808.4	NM_009808.4:766	Endogenous	mRNA	100	182.61	225.03	185.09	208.17	181.63	132.22	163.49
Casp3		NM_009810.2	NM_009810.2:630	Endogenous	mRNA	100	193	189.1	141.28	165.61	253.82	203.6	204.57
Casp7		NM_007611.2	NM_007611.2:1468	Endogenous	mRNA	100	363.6	340.38	262.85	342.32	416.82	396.67	422.56
Casp8		NM_009812.2	NM_009812.2:1463	Endogenous	mRNA	100	278.14	283.65	308.85	313.64	272.45	227	263.26
Casp9		NM_015733.4	NM_015733.4:1675	Endogenous	mRNA	100	22.21	26.47	23	26.83	19.79	18.72	18.45
Cavin2		NM_138741.1	NM_138741.1:158	Endogenous	mRNA	100	313.32	449.11	219.04	247.03	300.39	432.94	231.4
Cbl		NM_007619.2	NM_007619.2:3820	Endogenous	mRNA	100	514.72	536.09	616.6	618.03	390.04	450.49	477.06
Cblc		NM_023224.5	NM_023224.5:834	Endogenous	mRNA	100	121.66	100.22	117.19	129.53	136.22	125.2	121.57
Ccna1		NM_007628.3	NM_007628.3:375	Endogenous	mRNA	83.33	4.59	1	2.19	6.48	6.99	5.85	5.03
Ccna2		NM_009828.2	NM_009828.2:1280	Endogenous	mRNA	100	221.58	188.15	201.52	188.74	324.84	175.52	250.69
Ccnb1		NM_172301.3	NM_172301.3:2136	Endogenous	mRNA	100	7.77	1.89	6.57	9.25	9.31	7.02	12.58
Ccnb3		NM_183015.3	NM_183015.3:3324	Endogenous	mRNA	83.33	3.04	3.78	1.1	1	2.33	5.85	4.19
Ccnd1		NM_007631.1	NM_007631.1:2000	Endogenous	mRNA	100	745.31	772.46	826.88	851.18	592.63	576.86	851.84
Ccnd2		NM_009829.3	NM_009829.3:1665	Endogenous	mRNA	100	453.61	631.59	696.55	556.04	244.5	243.38	349.62
Ccnd3		NM_007632.2	NM_007632.2:1311	Endogenous	mRNA	100	100.63	99.28	109.52	110.1	100.13	107.65	77.13
Ccne1		NM_007633.2	NM_007633.2:885	Endogenous	mRNA	100	29.9	22.69	33.95	30.53	31.44	33.93	26.83
Ccne2		NM_001037134.1	NM_001037134.1:613	Endogenous	mRNA	100	174.09	128.59	165.38	177.64	246.83	174.35	151.75
Ccno		NM_001081062.1	NM_001081062.1:1365	Endogenous	mRNA	100	12.61	16.07	8.76	12.95	18.63	11.7	7.55
Ccr7		NM_007719.2	NM_007719.2:755	Endogenous	mRNA	100	32.81	36.87	26.28	26.83	36.09	39.78	31.02
Cd14		NM_009841.3	NM_009841.3:235	Endogenous	mRNA	100	792.9	715.73	714.07	841.93	747.48	867.05	871.12
Cd19		NM_009844.2	NM_009844.2:1697	Endogenous	mRNA	100	4.94	11.35	1.1	1.85	5.82	7.02	2.52
Cd40		NM_011611.2	NM_011611.2:1425	Endogenous	mRNA	100	47.04	58.62	54.76	66.61	32.6	32.76	36.89
Cdc14a		NM_001173553.1	NM_001173553.1:970	Endogenous	mRNA	100	128.19	143.71	170.85	136.93	100.13	101.8	115.7
Cdc14b		NM_172587.3	NM_172587.3:612	Endogenous	mRNA	100	20.54	15.13	24.09	16.65	19.79	19.89	27.67
Cdc25a		NM_007658.3	NM_007658.3:855	Endogenous	mRNA	100	141.59	144.66	136.9	139.7	149.03	145.09	134.15
Cdc25b		NM_001111075.4	NM_001111075.4:576	Endogenous	mRNA	100	79.08	100.22	95.28	82.34	69.86	53.82	72.94
Cdc25c		NM_009860.2	NM_009860.2:42	Endogenous	mRNA	100	24.15	13.24	31.76	19.43	38.42	15.21	26.83
Cdc6		NM_011799.2	NM_011799.2:2955	Endogenous	mRNA	100	11.83	12.29	13.14	11.1	8.15	12.87	13.41
Cdc7		NM_001271566.1	NM_001271566.1:2804	Endogenous	mRNA	100	42.71	41.6	27.38	43.48	54.72	42.12	46.95
Cdh1		NM_009864.2	NM_009864.2:1610	Endogenous	mRNA	100	940.53	826.36	1036.07	1098.21	767.28	853.01	1062.28
Cdk2		NM_016756.4	NM_016756.4:1468	Endogenous	mRNA	100	161.98	157.9	163.19	148.96	142.04	172.01	187.81
Cdk4		NM_009870.3	NM_009870.3:494	Endogenous	mRNA	100	584.7	595.66	604.55	630.98	547.22	504.32	625.46
Cdk6		NM_009873.2	NM_009873.2:820	Endogenous	mRNA	100	93.95	94.55	112.81	110.1	64.04	80.74	101.45
Cdkn1a		NM_007669.4	NM_007669.4:1670	Endogenous	mRNA	100	402.7	426.41	719.55	587.5	173.48	208.28	300.99
Cdkn1b		NM_009875.4	NM_009875.4:2016	Endogenous	mRNA	100	850.1	796.1	887.12	899.29	967.54	696.21	854.35
Cdkn1c		NM_009876.3	NM_009876.3:1240	Endogenous	mRNA	100	87.13	164.51	70.09	47.19	76.84	120.52	43.6
Cdkn2a		NM_001040654.1	NM_001040654.1:566	Endogenous	mRNA	100	27.59	35.93	47.09	34.23	13.97	17.55	16.77
Cdkn2b		NM_007670.4	NM_007670.4:1040	Endogenous	mRNA	100	226.1	306.34	365.8	323.82	121.09	70.21	169.36
Cdkn2c		NM_007671.2	NM_007671.2:265	Endogenous	mRNA	100	284.58	394.27	210.28	181.34	309.7	366.24	245.66
Cdkn2d		NM_009878.2	NM_009878.2:155	Endogenous	mRNA	100	49.95	64.29	54.76	56.44	55.89	33.93	34.38
Cebpa		NM_007678.3	NM_007678.3:1968	Endogenous	mRNA	100	1269.25	1457	1164.2	996.44	1160.81	1593.68	1243.38
Cebpe		NM_207131.1	NM_207131.1:196	Endogenous	mRNA	100	13.17	7.56	16.43	16.65	16.3	12.87	9.22
Chad		NM_007689.4	NM_007689.4:951	Endogenous	mRNA	100	13.56	10.4	14.24	10.18	19.79	17.55	9.22
Chek1		NM_007691.4	NM_007691.4:355	Endogenous	mRNA	100	95.84	75.64	73.38	91.59	117.59	99.46	117.38
Chek2		NM_016681.3	NM_016681.3:790	Endogenous	mRNA	100	67.49	50.11	47.09	42.56	104.79	86.59	73.78
Chuk		NM_001162410.1	NM_001162410.1:222	Endogenous	mRNA	100	437.89	471.8	413.99	371	527.43	430.6	412.5
Cic		NM_027882.3	NM_027882.3:5680	Endogenous	mRNA	100	172.52	179.64	197.14	204.47	160.67	126.37	166.85
Clcf1		NM_019952.3	NM_019952.3:385	Endogenous	mRNA	100	6.23	5.67	5.48	7.4	10.48	5.85	2.52
Cldn1		NM_016674.3	NM_016674.3:2355	Endogenous	mRNA	100	1018.07	1060.84	1432.53	1203.68	780.08	626.01	1005.27
Cntfr		NM_001146080.1	NM_001146080.1:427	Endogenous	mRNA	100	65.7	66.18	100.76	87.89	46.57	31.59	61.2
Col11a1		NM_007729.2	NM_007729.2:2644	Endogenous	mRNA	100	80.12	79.42	140.19	120.28	47.74	32.76	60.37
Col11a2		NM_009926.1	NM_009926.1:740	Endogenous	mRNA	100	7.78	7.56	6.57	10.18	9.31	4.68	8.38
Col1a1		NM_007742.3	NM_007742.3:215	Endogenous	mRNA	100	6223.26	6447.28	9739.67	10398.3	3149.44	3009.51	4595.39
Col1a2		NM_007743.2	NM_007743.2:4025	Endogenous	mRNA	100	2433.74	2389.25	3650.32	3934.86	1571.81	1186.49	1869.68
Col24a1		NM_027770.2	NM_027770.2:1184	Endogenous	mRNA	100	51.43	47.27	86.52	79.57	36.09	22.23	36.89
Col27a1		NM_025685.3	NM_025685.3:1148	Endogenous	mRNA	100	16.33	14.18	20.81	19.43	18.63	14.04	10.9
Col2a1		NM_001113515.2	NM_001113515.2:4346	Endogenous	mRNA	100	34.31	26.47	27.38	25.91	38.42	54.99	32.7
Col3a1		NM_009930.1	NM_009930.1:4370	Endogenous	mRNA	100	17555.2	19746.5	21619.4	24530.7	11134.2	12184.3	16116.1
Col4a3		NM_007734.2	NM_007734.2:7395	Endogenous	mRNA	100	7.1	5.67	6.57	6.48	11.64	4.68	7.55
Col4a4		NM_007735.2	NM_007735.2:5450	Endogenous	mRNA	100	5.18	2.84	6.57	2.78	5.82	4.68	8.38
Col4a5		NM_001163155.1	NM_001163155.1:5282	Endogenous	mRNA	100	75.28	64.29	50.38	49.04	101.29	93.61	93.06
Col4a6		NM_053185.2	NM_053185.2:6442	Endogenous	mRNA	100	168.04	82.26	81.05	119.35	264.3	210.62	250.69
Col5a1		NM_015734.2	NM_015734.2:6145	Endogenous	mRNA	100	233.9	242.99	330.75	393.21	175.81	97.12	163.49
Col5a2		NM_007737.2	NM_007737.2:4425	Endogenous	mRNA	100	1958.62	2146.26	2931.87	2919	1164.3	992.25	1598.03
Col6a6		NM_001102607.1	NM_001102607.1:2192	Endogenous	mRNA	100	24.92	61.46	15.33	17.58	15.14	25.74	14.25
Comp		NM_016685.2	NM_016685.2:514	Endogenous	mRNA	100	11.8	33.09	1.1	12.95	15.14	3.51	5.03
Creb3l1		NM_011957.2	NM_011957.2:1780	Endogenous	mRNA	100	19.3	18.91	23	11.1	20.96	23.4	18.45
Creb3l3		NM_145365.3	NM_145365.3:1390	Endogenous	mRNA	100	10.65	10.4	8.76	10.18	12.81	11.7	10.06
Creb3l4		NM_030080.2	NM_030080.2:1088	Endogenous	mRNA	100	26.35	25.53	28.48	17.58	29.11	28.08	29.34
Creb5		NM_172728.2	NM_172728.2:2415	Endogenous	mRNA	100	44.82	60.51	51.47	39.78	29.11	44.46	43.6
Crebbp		NM_001025432.1	NM_001025432.1:3770	Endogenous	mRNA	100	671.99	719.52	723.93	700.37	546.06	658.77	683.31
Crlf2		NM_001164735.1	NM_001164735.1:263	Endogenous	mRNA	100	87.43	121.02	98.57	99.92	64.04	59.68	81.33
Csf1r		NM_001037859.2	NM_001037859.2:1038	Endogenous	mRNA	100	655.28	876.47	684.5	771.61	429.63	528.89	640.55
Csf2		NM_009969.4	NM_009969.4:732	Endogenous	mRNA	83.33	4.68	1	3.29	9.25	3.49	3.51	7.55
Csf2rb		NM_007780.4	NM_007780.4:4185	Endogenous	mRNA	100	161.01	209.9	154.42	173.01	130.4	153.28	145.05
Csf3		NM_009971.1	NM_009971.1:830	Endogenous	mRNA	100	16.84	22.69	14.24	28.68	10.48	8.19	16.77
Csf3r		NM_001252651.1	NM_001252651.1:1294	Endogenous	mRNA	100	144.72	173.02	165.38	226.67	135.06	60.85	107.32
Ctgf		NM_010217.2	NM_010217.2:2240	Endogenous	mRNA	100	3558.76	3790.46	6721.28	5174.63	1820.97	1358.49	2486.76
Ctnnb1		NM_007614.2	NM_007614.2:2975	Endogenous	mRNA	100	3820.1	3824.49	4799.19	4604.71	3334.56	2865.59	3492.03
Cul1		NM_012042.3	NM_012042.3:919	Endogenous	mRNA	100	666.28	641.99	631.93	646.71	787.07	649.41	640.55
Cxcl1		NM_008176.1	NM_008176.1:560	Endogenous	mRNA	100	69.46	67.13	119.38	114.72	34.93	21.06	59.53
Cxcl2		NM_009140.2	NM_009140.2:765	Endogenous	mRNA	100	39.67	34.98	23	41.63	55.89	45.63	36.89
Cxcl5		NM_009141.2	NM_009141.2:565	Endogenous	mRNA	100	90.78	141.82	119.38	174.86	37.26	26.91	44.44
Cxxc4		NM_001004367.4	NM_001004367.4:132	Endogenous	mRNA	100	6.72	4.73	6.57	4.63	8.15	12.87	3.35
Cyld		NM_001276279.1	NM_001276279.1:2200	Endogenous	mRNA	100	114.36	151.28	105.14	97.15	108.28	128.71	95.58
Cyr61		NM_010516.1	NM_010516.1:804	Endogenous	mRNA	100	330.24	355.5	555.27	543.09	161.84	98.29	267.46
Daxx		NM_007829.3	NM_007829.3:1215	Endogenous	mRNA	100	52.45	53.89	52.57	68.46	38.42	35.1	66.24
Ddb2		NM_028119.5	NM_028119.5:1428	Endogenous	mRNA	100	27.75	17.96	21.9	21.28	43.08	42.12	20.12
Ddit3		NM_007837.3	NM_007837.3:255	Endogenous	mRNA	100	64.01	66.18	60.24	74.02	52.39	66.7	64.56
Ddit4		NM_029083.2	NM_029083.2:70	Endogenous	mRNA	100	85.03	92.66	119.38	93.44	72.19	44.46	88.03
Dkk1		NM_010051.3	NM_010051.3:55	Endogenous	mRNA	100	9.34	9.45	10.95	3.7	10.48	10.53	10.9
Dkk2		NM_020265.4	NM_020265.4:3285	Endogenous	mRNA	100	131.41	154.11	258.47	171.16	68.69	36.27	99.77
Dkk4		NM_145592.2	NM_145592.2:252	Endogenous	mRNA	100	13.51	12.29	17.52	10.18	15.14	11.7	14.25
Dll1		NM_007865.3	NM_007865.3:1090	Endogenous	mRNA	100	33.34	31.2	29.57	47.19	27.94	33.93	30.18
Dll3		NM_007866.2	NM_007866.2:839	Endogenous	mRNA	100	4.5	1.89	6.57	1.85	8.15	3.51	5.03
Dll4		NM_019454.2	NM_019454.2:542	Endogenous	mRNA	100	28.79	34.04	41.62	34.23	17.46	21.06	24.31
Dnmt1		NM_010066.3	NM_010066.3:2380	Endogenous	mRNA	100	78.45	95.49	87.62	77.72	59.38	72.55	77.97
Dnmt3a		NM_007872.4	NM_007872.4:7160	Endogenous	mRNA	100	14.8	17.02	18.62	17.58	12.81	9.36	13.41
Dtx1		NM_008052.3	NM_008052.3:2018	Endogenous	mRNA	100	5.27	5.67	8.76	6.48	3.49	4.68	2.52
Dtx3		NM_030714.2	NM_030714.2:978	Endogenous	mRNA	100	54.28	53.89	51.47	61.06	48.9	54.99	55.34
Dtx4		NM_172442.3	NM_172442.3:3615	Endogenous	mRNA	100	119.27	138.04	128.14	134.15	88.49	128.71	98.1
Dusp10		NM_022019.5	NM_022019.5:145	Endogenous	mRNA	100	39.59	48.22	42.71	38.86	34.93	40.95	31.86
Dusp2		NM_010090.2	NM_010090.2:1472	Endogenous	mRNA	100	90.67	88.88	174.14	128.6	57.05	25.74	69.59
Dusp4		NM_176933.4	NM_176933.4:2200	Endogenous	mRNA	100	790.19	558.78	600.17	643.01	822	1281.27	835.91
Dusp5		NM_001085390.1	NM_001085390.1:790	Endogenous	mRNA	100	159.34	126.7	204.8	148.96	111.77	186.05	177.75
Dusp6		NM_026268.2	NM_026268.2:1648	Endogenous	mRNA	100	554.01	590.93	679.03	609.71	458.74	519.53	466.16
Dusp8		NM_008748.1	NM_008748.1:790	Endogenous	mRNA	100	20.58	18.91	29.57	24.06	16.3	18.72	15.93
Dvl1		NM_010091.3	NM_010091.3:1530	Endogenous	mRNA	100	157.24	146.55	173.04	196.14	165.33	124.03	138.34
Dvl2		NM_007888.3	NM_007888.3:1695	Endogenous	mRNA	100	53.41	52	66.81	47.19	61.71	43.29	49.47
Dvl3		NM_007889.2	NM_007889.2:1550	Endogenous	mRNA	100	63.17	68.08	74.47	61.06	53.56	63.19	58.69
E2f1		NM_007891.4	NM_007891.4:926	Endogenous	mRNA	100	53.65	47.27	50.38	51.81	58.22	47.97	66.24
E2f5		NM_007892.2	NM_007892.2:700	Endogenous	mRNA	100	103.85	89.82	104.04	93.44	115.27	100.63	119.89
Efna1		NM_010107.4	NM_010107.4:437	Endogenous	mRNA	100	270.66	234.48	381.13	373.78	229.37	181.37	223.86
Efna2		NM_007909.3	NM_007909.3:1232	Endogenous	mRNA	100	26.12	19.86	47.09	35.16	24.45	11.7	18.45
Efna3		NM_010108.1	NM_010108.1:788	Endogenous	mRNA	100	65.16	77.53	119.38	99	36.09	24.57	34.38
Efna5		NM_207654.2	NM_207654.2:1130	Endogenous	mRNA	100	95.12	96.44	87.62	108.25	75.68	97.12	105.64
Egf		NM_010113.3	NM_010113.3:1886	Endogenous	mRNA	100	28.02	28.36	13.14	12.03	38.42	46.8	29.34
Egfr		NM_207655.2	NM_207655.2:1335	Endogenous	mRNA	100	75.1	73.75	83.24	99.92	52.39	72.55	68.75
Eif4ebp1		NM_007918.3	NM_007918.3:554	Endogenous	mRNA	100	1329.01	1470.23	1292.34	1164.82	1286.55	1479.01	1281.11
Elk1		NM_007922.4	NM_007922.4:3070	Endogenous	mRNA	100	10.71	10.4	8.76	10.18	12.81	12.87	9.22
Endog		NM_007931.1	NM_007931.1:568	Endogenous	mRNA	100	71.22	61.46	46	60.14	89.65	97.12	72.94
Ep300		NM_177821.6	NM_177821.6:4305	Endogenous	mRNA	100	455.25	479.36	499.41	442.24	420.31	445.81	444.36
Epha2		NM_010139.2	NM_010139.2:1705	Endogenous	mRNA	100	32.12	26.47	65.71	38.86	17.46	19.89	24.31
Epo		NM_007942.2	NM_007942.2:216	Endogenous	mRNA	100	7.63	1.89	7.67	10.18	9.31	11.7	5.03
Epor		NM_010149.3	NM_010149.3:294	Endogenous	mRNA	100	10.11	7.56	16.43	6.48	15.14	5.85	9.22
Erbb2		NM_001003817.1	NM_001003817.1:1395	Endogenous	mRNA	100	152.05	146.55	227.8	188.74	111.77	104.14	133.31
Erbb3		NM_010153.1	NM_010153.1:1290	Endogenous	mRNA	100	169.29	146.55	182.9	190.59	145.54	155.62	194.51
Ercc2		NM_007949.4	NM_007949.4:1800	Endogenous	mRNA	100	233.25	175.86	205.9	234.07	319.02	260.93	203.74
Ercc3		NM_133658.1	NM_133658.1:555	Endogenous	mRNA	100	244.41	250.55	285.85	234.07	206.08	243.38	246.5
Ercc4		NM_015769.1	NM_015769.1:445	Endogenous	mRNA	100	178.26	188.15	191.66	173.94	206.08	157.96	151.75
Ercc6		NM_001081221.1	NM_001081221.1:2016	Endogenous	mRNA	100	81.4	78.48	74.47	87.89	83.83	86.59	77.13
Ets2		NM_011809.2	NM_011809.2:3284	Endogenous	mRNA	100	708.35	691.15	788.55	783.64	534.41	686.85	765.48
Etv1		NM_007960.4	NM_007960.4:1836	Endogenous	mRNA	100	36.76	44.44	35.05	33.31	38.42	31.59	37.73
Etv4		NM_008815.2	NM_008815.2:1495	Endogenous	mRNA	100	81.56	86.98	152.23	88.82	46.57	40.95	73.78
Eya1		NM_001252192.1	NM_001252192.1:1016	Endogenous	mRNA	100	13.06	4.73	28.48	14.8	13.97	10.53	5.87
Ezh2		NM_007971.2	NM_007971.2:425	Endogenous	mRNA	100	293.54	259.06	313.23	263.68	351.62	272.63	300.99
Faap24		NM_178643.5	NM_178643.5:644	Endogenous	mRNA	100	58.64	46.33	66.81	61.06	72.19	52.65	52.82
Fanca		NM_016925.2	NM_016925.2:3350	Endogenous	mRNA	100	22.51	18.91	29.57	25.91	17.46	22.23	20.96
Fancb		NM_001146081.1	NM_001146081.1:2746	Endogenous	mRNA	100	37.16	28.36	28.48	33.31	39.59	53.82	39.41
Fancc		NM_007985.2	NM_007985.2:1115	Endogenous	mRNA	100	42.18	47.27	46	34.23	53.56	35.1	36.89
Fance		NM_001163819.1	NM_001163819.1:517	Endogenous	mRNA	100	24.88	20.8	20.81	25.91	33.76	30.42	17.61
Fancf		NM_001115087.1	NM_001115087.1:1128	Endogenous	mRNA	100	114.11	98.33	107.33	141.56	118.76	102.97	115.7
Fancg		NM_053081.1	NM_053081.1:813	Endogenous	mRNA	100	82.55	87.93	87.62	80.49	78.01	74.89	86.36
Fancl		NM_025923.3	NM_025923.3:154	Endogenous	mRNA	100	269.55	241.1	205.9	226.67	393.53	284.34	265.78
Fas		NM_007987.2	NM_007987.2:95	Endogenous	mRNA	100	92.32	98.33	98.57	99.92	84.99	80.74	91.39
Fasl		NM_010177.3	NM_010177.3:645	Endogenous	mRNA	100	6.34	7.56	6.57	3.7	3.49	11.7	5.03
Fbxw11		NM_134015.2	NM_134015.2:276	Endogenous	mRNA	100	581.19	568.24	583.74	622.66	543.73	588.56	580.19
Fbxw7		NM_080428.2	NM_080428.2:960	Endogenous	mRNA	100	145.74	137.1	135.81	127.68	153.69	147.43	172.71
Fen1		NM_001271614.1	NM_001271614.1:1880	Endogenous	mRNA	100	275.3	257.17	247.52	256.28	287.58	291.36	311.89
Fgf1		NM_010197.3	NM_010197.3:680	Endogenous	mRNA	83.33	4.07	1	6.57	1.85	8.15	3.51	3.35
Fgf10		NM_008002.4	NM_008002.4:1287	Endogenous	mRNA	100	78.08	173.02	61.33	58.29	44.24	73.72	57.85
Fgf11		NM_010198.1	NM_010198.1:183	Endogenous	mRNA	100	11.31	17.02	9.86	9.25	9.31	14.04	8.38
Fgf12		NM_001276419.1	NM_001276419.1:632	Endogenous	mRNA	100	8.2	6.62	6.57	4.63	9.31	18.72	3.35
Fgf13		NM_010200.2	NM_010200.2:700	Endogenous	mRNA	100	28.39	23.64	36.14	19.43	40.75	21.06	29.34
Fgf14		NM_207667.3	NM_207667.3:692	Endogenous	mRNA	100	11.84	6.62	15.33	10.18	16.3	11.7	10.9
Fgf15		NM_008003.2	NM_008003.2:315	Endogenous	mRNA	100	10	10.4	14.24	8.33	12.81	11.7	2.52
Fgf16		NM_030614.2	NM_030614.2:2295	Endogenous	mRNA	100	5.78	2.84	7.67	2.78	5.82	10.53	5.03
Fgf17		NM_008004.4	NM_008004.4:711	Endogenous	mRNA	100	7.7	9.45	5.48	5.55	11.64	8.19	5.87
Fgf18		NM_008005.1	NM_008005.1:482	Endogenous	mRNA	100	14.68	18.91	14.24	22.2	11.64	9.36	11.74
Fgf2		NM_008006.2	NM_008006.2:287	Endogenous	mRNA	100	35.11	46.33	42.71	44.41	22.12	25.74	29.34
Fgf20		NM_030610.1	NM_030610.1:475	Endogenous	mRNA	100	4.16	3.78	5.48	1.85	8.15	2.34	3.35
Fgf21		NM_020013.4	NM_020013.4:440	Endogenous	mRNA	100	2.14	2.84	1.1	3.7	1.16	2.34	1.68
Fgf22		NM_023304.1	NM_023304.1:165	Endogenous	mRNA	100	27.32	26.47	53.67	28.68	23.29	11.7	20.12
Fgf23		NM_022657.3	NM_022657.3:1246	Endogenous	mRNA	100	66.98	85.09	52.57	140.63	20.96	45.63	57.01
Fgf3		NM_008007.2	NM_008007.2:1005	Endogenous	mRNA	100	5.29	7.56	3.29	8.33	2.33	3.51	6.71
Fgf4		NM_010202.5	NM_010202.5:2785	Endogenous	mRNA	100	8.85	7.56	9.86	6.48	11.64	11.7	5.87
Fgf5		NM_001277268.1	NM_001277268.1:1072	Endogenous	mRNA	100	5.84	3.78	3.29	5.55	4.66	9.36	8.38
Fgf6		NM_010204.1	NM_010204.1:690	Endogenous	mRNA	100	5.69	3.78	5.48	5.55	9.31	5.85	4.19
Fgf7		NM_008008.4	NM_008008.4:213	Endogenous	mRNA	100	155.86	178.7	192.76	262.76	125.74	62.02	113.19
Fgf8		NM_001166361.1	NM_001166361.1:590	Endogenous	mRNA	100	8.81	5.67	9.86	11.1	6.99	11.7	7.55
Fgf9		NM_013518.3	NM_013518.3:1070	Endogenous	mRNA	100	10.09	12.29	12.05	10.18	11.64	9.36	5.03
Fgfr1		NM_001079908.2	NM_001079908.2:1308	Endogenous	mRNA	100	339.97	365.9	415.08	408.94	248	298.38	303.51
Fgfr2		NM_010207.2	NM_010207.2:3205	Endogenous	mRNA	100	40.77	41.6	66.81	40.71	40.75	24.57	30.18
Fgfr3		NM_008010.3	NM_008010.3:3520	Endogenous	mRNA	100	39.46	34.04	54.76	57.36	25.61	22.23	42.76
Fgfr4		NM_008011.2	NM_008011.2:1665	Endogenous	mRNA	83.33	2.76	1	2.19	1.85	4.66	3.51	3.35
Figf		NM_010216.1	NM_010216.1:934	Endogenous	mRNA	100	141.41	225.97	142.38	161.91	86.16	114.67	117.38
Flna		NM_010227.2	NM_010227.2:8205	Endogenous	mRNA	100	170.39	163.57	198.23	232.22	153.69	122.86	151.75
Flnc		NM_001081185.1	NM_001081185.1:5118	Endogenous	mRNA	100	26.08	28.36	21.9	45.33	17.46	14.04	29.34
Flt1		NM_010228.3	NM_010228.3:1550	Endogenous	mRNA	100	31.37	30.26	49.28	45.33	16.3	21.06	25.99
Flt3		NM_010229.2	NM_010229.2:3302	Endogenous	mRNA	100	8.2	9.45	7.67	10.18	8.15	7.02	6.71
Fn1		NM_010233.1	NM_010233.1:2627	Endogenous	mRNA	100	4142.86	4559.14	5385.13	6626.26	2207.52	2273.52	3805.6
Fos		NM_010234.2	NM_010234.2:1330	Endogenous	mRNA	100	277.9	212.73	271.61	248.88	211.9	252.74	469.52
Fosl1		NM_010235.2	NM_010235.2:353	Endogenous	mRNA	100	25.56	17.02	37.24	41.63	17.46	19.89	20.12
Foxl2		NM_012020.2	NM_012020.2:2379	Endogenous	mRNA	100	11.03	9.45	7.67	18.5	13.97	8.19	8.38
Foxo4		NM_018789.2	NM_018789.2:114	Endogenous	mRNA	100	177.55	170.19	200.42	167.46	173.48	174.35	179.42
Fst		NM_008046.1	NM_008046.1:680	Endogenous	mRNA	100	120.61	133.31	233.28	142.48	67.53	51.48	95.58
Fubp1		NM_057172.2	NM_057172.2:370	Endogenous	mRNA	100	242.97	240.15	258.47	266.46	254.98	189.56	248.17
Fut8		NM_016893.4	NM_016893.4:2235	Endogenous	mRNA	100	206.09	222.19	152.23	169.31	188.62	270.29	233.92
Fzd10		NM_175284.3	NM_175284.3:2030	Endogenous	mRNA	100	199.01	209.9	370.18	271.08	112.94	80.74	149.24
Fzd2		NM_020510.2	NM_020510.2:2955	Endogenous	mRNA	100	40.38	45.38	56.95	47.19	26.78	31.59	34.38
Fzd3		NM_021458.1	NM_021458.1:360	Endogenous	mRNA	100	115.81	104.95	142.38	112.87	124.58	111.16	98.93
Fzd7		NM_008057.3	NM_008057.3:4350	Endogenous	mRNA	100	305.3	286.48	268.33	320.12	332.99	290.19	333.69
Fzd8		NM_008058.1	NM_008058.1:810	Endogenous	mRNA	100	10.84	4.73	9.86	15.73	11.64	16.38	6.71
Fzd9		NM_010246.1	NM_010246.1:745	Endogenous	mRNA	100	7.62	5.67	8.76	3.7	8.15	9.36	10.06
Gadd45a		NM_007836.1	NM_007836.1:654	Endogenous	mRNA	100	227.73	250.55	243.14	246.1	241.01	197.75	187.81
Gadd45b		NM_008655.1	NM_008655.1:109	Endogenous	mRNA	100	190.14	229.75	221.23	232.22	149.03	133.39	175.23
Gadd45g		NM_011817.1	NM_011817.1:15	Endogenous	mRNA	100	101.38	110.62	118.28	121.2	72.19	102.97	83
Gas1		NM_008086.1	NM_008086.1:1964	Endogenous	mRNA	100	183.71	212.73	194.95	235.93	169.99	131.05	157.62
Gata1		NM_008089.1	NM_008089.1:1640	Endogenous	mRNA	100	10.84	9.45	8.76	9.25	13.97	15.21	8.38
Gata2		NM_008090.4	NM_008090.4:2960	Endogenous	mRNA	100	80.17	123.86	79.95	87.89	55.89	59.68	73.78
Gata3		NM_008091.3	NM_008091.3:1943	Endogenous	mRNA	100	854.22	763.01	1010.88	912.24	740.5	834.29	864.41
Gdf6		NM_013526.1	NM_013526.1:1854	Endogenous	mRNA	100	12.34	8.51	16.43	20.35	12.81	5.85	10.06
Ghr		NM_001048147.1	NM_001048147.1:540	Endogenous	mRNA	100	763.3	1293.43	485.18	396.91	767.28	1087.03	550
Gli1		NM_010296.2	NM_010296.2:2279	Endogenous	mRNA	100	12.78	11.35	12.05	13.88	13.97	7.02	18.45
Gli3		NM_008130.2	NM_008130.2:6930	Endogenous	mRNA	100	28.48	29.31	46	32.38	16.3	17.55	29.34
Gna11		NM_010301.3	NM_010301.3:965	Endogenous	mRNA	100	248.89	214.63	232.18	257.2	277.1	274.98	237.27
Gnaq		NM_008139.5	NM_008139.5:3080	Endogenous	mRNA	100	392.48	431.14	355.94	380.26	376.07	410.71	400.77
Gnas		NM_010309.3	NM_010309.3:2592	Endogenous	mRNA	100	944.15	963.45	860.83	972.38	882.54	1021.5	964.19
Gng12		NM_001177559.1	NM_001177559.1:898	Endogenous	mRNA	100	436.55	415.07	484.08	432.99	423.81	395.5	467.84
Gng2		NM_010315.4	NM_010315.4:1352	Endogenous	mRNA	100	45.29	55.78	50.38	47.19	45.41	32.76	40.24
Gng4		NM_010317.2	NM_010317.2:2034	Endogenous	mRNA	100	19.86	17.96	35.05	27.76	16.3	7.02	15.09
Gng7		NM_001038655.1	NM_001038655.1:1160	Endogenous	mRNA	100	22.75	13.24	18.62	15.73	24.45	35.1	29.34
Gngt1		NM_010314.2	NM_010314.2:150	Endogenous	mRNA	100	5.93	3.78	10.95	6.48	4.66	4.68	5.03
Gpc4		NM_008150.2	NM_008150.2:310	Endogenous	mRNA	100	607.55	613.62	728.31	672.62	454.08	583.88	592.76
Grb2		NM_008163.3	NM_008163.3:1783	Endogenous	mRNA	100	310.1	388.6	303.37	322.89	253.82	263.27	328.66
Gria3		NM_016886.3	NM_016886.3:390	Endogenous	mRNA	100	135.34	171.13	190.57	175.79	104.79	78.4	91.39
Grin1		NM_008169.2	NM_008169.2:492	Endogenous	mRNA	83.33	3.76	1	4.38	1.85	8.15	4.68	2.52
Grin2a		NM_008170.2	NM_008170.2:1788	Endogenous	mRNA	100	10.32	6.62	8.76	11.1	9.31	15.21	10.9
Grin2b		NM_008171.3	NM_008171.3:6340	Endogenous	mRNA	100	5.07	6.62	3.29	3.7	10.48	4.68	1.68
Gsk3b		NM_019827.3	NM_019827.3:2215	Endogenous	mRNA	100	549.07	570.13	573.89	587.5	519.28	496.13	547.49
Gtf2h3		NM_181410.3	NM_181410.3:38	Endogenous	mRNA	100	175.74	173.02	182.9	185.04	183.96	156.79	172.71
Gzmb		NM_013542.2	NM_013542.2:1020	Endogenous	mRNA	100	8.81	3.78	8.76	11.1	8.15	15.21	5.87
H2afx		NM_010436.2	NM_010436.2:980	Endogenous	mRNA	100	444.05	491.65	524.6	447.8	414.49	328.8	456.94
H3f3a		NM_008210.4	NM_008210.4:450	Endogenous	mRNA	100	15920	15071.1	16974.6	16082.7	17341.1	14038.9	16011.4
Hdac1		NM_008228.2	NM_008228.2:631	Endogenous	mRNA	100	475.92	478.42	523.51	528.29	459.9	384.96	480.42
Hdac10		NM_199198.1	NM_199198.1:2155	Endogenous	mRNA	100	34.84	34.04	30.67	25.91	43.08	40.95	34.38
Hdac11		NM_144919.2	NM_144919.2:610	Endogenous	mRNA	100	37.07	34.04	27.38	42.56	40.75	37.44	40.24
Hdac2		NM_008229.2	NM_008229.2:1010	Endogenous	mRNA	100	662.45	641.04	697.65	705	712.55	562.82	655.65
Hdac4		NM_207225.1	NM_207225.1:2800	Endogenous	mRNA	100	53.3	56.73	62.43	79.57	46.57	29.25	45.27
Hdac5		NM_010412.3	NM_010412.3:2122	Endogenous	mRNA	100	221.03	200.44	232.18	223.9	252.65	214.13	202.9
Hdac6		NM_010413.3	NM_010413.3:2195	Endogenous	mRNA	100	44.59	43.49	51.47	45.33	50.07	32.76	44.44
Hells		NM_008234.3	NM_008234.3:1082	Endogenous	mRNA	100	237.71	187.21	211.37	201.69	329.5	228.17	268.3
Hes1		NM_008235.2	NM_008235.2:983	Endogenous	mRNA	100	12.75	8.51	13.14	27.76	8.15	4.68	14.25
Hes5		NM_010419.4	NM_010419.4:1145	Endogenous	mRNA	100	5.86	5.67	4.38	5.55	10.48	2.34	6.71
Hgf		NM_010427.5	NM_010427.5:483	Endogenous	mRNA	100	2077.41	1343.54	614.41	626.36	3687.35	4183.13	2009.7
Hhex		NM_008245.2	NM_008245.2:1440	Endogenous	mRNA	100	72.88	91.71	85.43	82.34	52.39	60.85	64.56
Hhip		NM_020259.4	NM_020259.4:1784	Endogenous	mRNA	100	12.76	15.13	13.14	6.48	6.99	22.23	12.58
Hist1h3b		NM_178203.1	NM_178203.1:121	Endogenous	mRNA	100	9901.33	7982.75	10800.9	9534.16	14201	6921.18	9968
Hist2h3b		NM_178215.1	NM_178215.1:297	Endogenous	mRNA	100	36790	32997.5	38931.3	33768.8	52166.6	27231.9	35643.8
Hist2h3c2		NM_054045.3	NM_054045.3:825	Endogenous	mRNA	100	42.38	42.55	35.05	47.19	61.71	35.1	32.7
Hmga1		NM_001025427.2	NM_001025427.2:1036	Endogenous	mRNA	100	116.81	138.04	173.04	147.11	71.02	81.91	89.71
Hmga2		NM_010441.2	NM_010441.2:3565	Endogenous	mRNA	100	37.09	29.31	41.62	40.71	41.91	24.57	44.44
Hnf1a		NM_009327.1	NM_009327.1:2695	Endogenous	mRNA	100	3.24	2.84	5.48	2.78	2.33	3.51	2.52
Hoxa10		NM_008263.3	NM_008263.3:1205	Endogenous	mRNA	100	21.35	25.53	26.28	32.38	13.97	19.89	10.06
Hoxa11		NM_010450.2	NM_010450.2:955	Endogenous	mRNA	100	5.75	4.73	4.38	3.7	9.31	8.19	4.19
Hoxa9		NM_010456.2	NM_010456.2:985	Endogenous	mRNA	100	8.2	4.73	13.14	4.63	8.15	9.36	9.22
Hpgd		NM_008278.2	NM_008278.2:845	Endogenous	mRNA	100	216.54	219.35	191.66	222.97	194.44	217.64	253.2
Hras		NM_001130443.1	NM_001130443.1:240	Endogenous	mRNA	100	524.51	511.51	650.55	614.33	523.94	399.01	447.72
Hsp90b1		NM_011631.1	NM_011631.1:1705	Endogenous	mRNA	100	3625.21	3676.05	3544.09	3649.9	4068.07	3467.03	3346.14
Hspa1a		NM_010479.2	NM_010479.2:2184	Endogenous	mRNA	100	273.36	214.63	291.32	349.72	135.06	217.64	431.79
Hspa2		NM_008301.4	NM_008301.4:1795	Endogenous	mRNA	100	26.48	32.15	29.57	35.16	18.63	19.89	23.48
Hspb1		NM_013560.2	NM_013560.2:630	Endogenous	mRNA	100	1035.41	959.67	2153.18	1564.51	413.33	375.6	746.2
Ibsp		NM_008318.3	NM_008318.3:114	Endogenous	mRNA	100	15.58	10.4	24.09	22.2	11.64	11.7	13.41
Id1		NM_010495.2	NM_010495.2:280	Endogenous	mRNA	100	814.96	950.21	1307.68	1147.24	604.27	375.6	504.73
Id2		NM_010496.3	NM_010496.3:625	Endogenous	mRNA	100	2474.82	2256.88	1693.19	2152.01	4097.18	2513.39	2136.3
Id4		NM_031166.2	NM_031166.2:875	Endogenous	mRNA	100	79.72	88.88	94.19	98.07	58.22	58.51	80.49
Idh1		NM_010497.2	NM_010497.2:495	Endogenous	mRNA	100	570.59	661.84	488.46	534.76	618.24	553.46	566.77
Idh2		NM_173011.2	NM_173011.2:373	Endogenous	mRNA	100	159.67	158.84	113.9	152.66	194.44	169.67	168.52
Ifna1		NM_010502.2	NM_010502.2:354	Endogenous	mRNA	100	10.95	7.56	14.24	14.8	9.31	10.53	9.22
Ifnar1		NM_010508.1	NM_010508.1:1195	Endogenous	mRNA	100	493.57	579.58	499.41	578.25	449.42	409.54	445.2
Ifnar2		NM_001110498.1	NM_001110498.1:725	Endogenous	mRNA	100	348.33	402.78	372.37	338.62	327.17	290.19	358.84
Ifnb1		NM_010510.1	NM_010510.1:335	Endogenous	mRNA	66.67	2.48	9.45	1.1	1	1.16	1.17	1
Ifng		NM_008337.1	NM_008337.1:95	Endogenous	mRNA	100	4.87	2.84	5.48	7.4	8.15	1.17	4.19
Igf1		NM_001111274.1	NM_001111274.1:418	Endogenous	mRNA	100	71.76	103.06	62.43	84.19	69.86	57.34	53.66
Igf1r		NM_010513.2	NM_010513.2:3390	Endogenous	mRNA	100	137.46	137.1	189.47	186.89	97.8	99.46	114.03
Igfbp3		NM_008343.2	NM_008343.2:1645	Endogenous	mRNA	100	454.91	354.56	1003.21	779.02	208.41	125.2	259.07
Ikbkb		NM_010546.2	NM_010546.2:498	Endogenous	mRNA	100	413.92	415.07	432.61	440.39	365.59	428.26	401.6
Ikbkg		NM_178590.2	NM_178590.2:525	Endogenous	mRNA	100	92.32	82.26	85.43	87.89	103.62	98.29	96.42
Il10		NM_010548.1	NM_010548.1:985	Endogenous	mRNA	100	6.42	9.45	8.76	6.48	5.82	4.68	3.35
Il11		NM_008350.2	NM_008350.2:285	Endogenous	mRNA	100	8.68	7.56	9.86	9.25	6.99	5.85	12.58
Il11ra1		NM_010549.3	NM_010549.3:22	Endogenous	mRNA	100	88.14	111.57	67.9	89.74	102.46	84.25	72.94
Il11ra2		NM_001099348.1	NM_001099348.1:122	Endogenous	mRNA	100	6.29	6.62	6.57	5.55	9.31	4.68	5.03
Il12a		NM_008351.1	NM_008351.1:355	Endogenous	mRNA	100	10.35	11.35	7.67	12.03	13.97	12.87	4.19
Il12b		NM_001303244.1	NM_001303244.1:414	Endogenous	mRNA	100	21.1	22.69	9.86	12.03	24.45	25.74	31.86
Il12rb2		NM_008354.3	NM_008354.3:1395	Endogenous	mRNA	100	22.94	20.8	30.67	22.2	20.96	24.57	18.45
Il13		NM_008355.2	NM_008355.2:425	Endogenous	mRNA	100	5.88	8.51	7.67	2.78	9.31	1.17	5.87
Il13ra2		NM_008356.3	NM_008356.3:1010	Endogenous	mRNA	100	71.48	104	72.28	125.83	57.05	21.06	48.63
Il15		NM_008357.2	NM_008357.2:854	Endogenous	mRNA	100	39.87	35.93	24.09	26.83	39.59	72.55	40.24
Il19		NM_001009940.1	NM_001009940.1:905	Endogenous	mRNA	100	25.36	26.47	46	34.23	17.46	7.02	20.96
Il1a		NM_010554.4	NM_010554.4:225	Endogenous	mRNA	100	32.83	31.2	69	48.11	13.97	12.87	21.8
Il1b		NM_008361.3	NM_008361.3:1120	Endogenous	mRNA	100	210.78	208.95	234.37	311.79	188.62	114.67	206.25
Il1r1		NM_001123382.1	NM_001123382.1:820	Endogenous	mRNA	100	505.2	670.35	555.27	637.46	359.77	390.82	417.53
Il1r2		NM_010555.4	NM_010555.4:458	Endogenous	mRNA	100	66.32	62.4	73.38	92.52	73.35	52.65	43.6
Il1rap		NM_134103.2	NM_134103.2:945	Endogenous	mRNA	100	306.67	284.59	283.66	305.32	344.63	312.42	309.38
Il2		NM_008366.2	NM_008366.2:485	Endogenous	mRNA	100	6.03	4.73	3.29	6.48	11.64	5.85	4.19
Il20ra		NM_172786.2	NM_172786.2:1860	Endogenous	mRNA	100	4.49	6.62	7.67	4.63	1.16	3.51	3.35
Il20rb		NM_001033543.3	NM_001033543.3:813	Endogenous	mRNA	100	18.75	12.29	23	15.73	22.12	23.4	15.93
Il22ra1		NM_178257.1	NM_178257.1:685	Endogenous	mRNA	100	10.18	3.78	15.33	17.58	8.15	7.02	9.22
Il22ra2		NM_178258.5	NM_178258.5:20	Endogenous	mRNA	100	3.28	3.78	2.19	3.7	2.33	3.51	4.19
Il23a		NM_031252.1	NM_031252.1:360	Endogenous	mRNA	100	10.02	11.35	13.14	9.25	10.48	5.85	10.06
Il23r		NM_144548.1	NM_144548.1:690	Endogenous	mRNA	100	9.54	6.62	19.71	3.7	10.48	11.7	5.03
Il24		NM_053095.2	NM_053095.2:545	Endogenous	mRNA	100	39.44	38.76	83.24	57.36	19.79	19.89	17.61
Il2ra		NM_008367.2	NM_008367.2:325	Endogenous	mRNA	100	73.53	99.28	88.71	77.72	52.39	52.65	70.43
Il2rb		NM_008368.3	NM_008368.3:2365	Endogenous	mRNA	100	60.22	86.98	49.28	49.04	58.22	72.55	45.27
Il3		NM_010556.4	NM_010556.4:155	Endogenous	mRNA	83.33	5	2.84	5.48	1	6.99	7.02	6.71
Il3ra		NM_008369.1	NM_008369.1:567	Endogenous	mRNA	100	84.89	102.11	101.85	99.92	69.86	64.36	71.27
Il4		NM_021283.1	NM_021283.1:345	Endogenous	mRNA	100	6.22	3.78	5.48	12.03	5.82	3.51	6.71
Il5ra		NM_008370.2	NM_008370.2:2290	Endogenous	mRNA	100	8.41	10.4	6.57	8.33	12.81	8.19	4.19
Il6		NM_031168.1	NM_031168.1:40	Endogenous	mRNA	100	26.93	34.04	26.28	41.63	25.61	10.53	23.48
Il6ra		NM_010559.2	NM_010559.2:2825	Endogenous	mRNA	100	168.09	196.66	155.52	160.06	142.04	173.18	181.1
Il7		NM_008371.2	NM_008371.2:1055	Endogenous	mRNA	100	7.75	6.62	6.57	7.4	6.99	10.53	8.38
Il7r		NM_008372.3	NM_008372.3:1020	Endogenous	mRNA	100	103.15	127.64	92	101.77	82.67	104.14	110.67
Inhba		NM_008380.1	NM_008380.1:750	Endogenous	mRNA	100	56.45	51.06	94.19	96.22	32.6	21.06	43.6
Inhbb		NM_008381.3	NM_008381.3:1084	Endogenous	mRNA	100	3.86	2.84	1.1	3.7	5.82	4.68	5.03
Insr		NM_010568.2	NM_010568.2:8314	Endogenous	mRNA	100	151.04	167.35	129.23	167.46	122.25	155.62	164.33
Irak2		NM_001113553.1	NM_001113553.1:485	Endogenous	mRNA	100	137.7	125.75	152.23	156.36	132.73	133.39	125.76
Irak3		NM_028679.3	NM_028679.3:2608	Endogenous	mRNA	100	118.15	127.64	140.19	141.56	83.83	98.29	117.38
Irs1		NM_010570.4	NM_010570.4:2135	Endogenous	mRNA	100	28.1	19.86	35.05	28.68	23.29	37.44	24.31
Itga2		NM_008396.2	NM_008396.2:1860	Endogenous	mRNA	100	43.25	49.17	60.24	65.69	26.78	19.89	37.73
Itga3		NM_013565.2	NM_013565.2:1065	Endogenous	mRNA	100	101.42	96.44	130.33	135.08	71.02	72.55	103.13
Itga6		NM_008397.3	NM_008397.3:910	Endogenous	mRNA	100	1080.19	875.52	900.26	1025.12	1114.24	1356.15	1209.84
Itga7		NM_008398.2	NM_008398.2:2435	Endogenous	mRNA	100	28.23	45.38	17.52	27.76	22.12	33.93	22.64
Itga8		NM_001001309.2	NM_001001309.2:5048	Endogenous	mRNA	100	103.71	65.24	62.43	61.06	137.39	148.6	147.56
Itga9		NM_001113514.1	NM_001113514.1:440	Endogenous	mRNA	100	69.42	80.37	84.33	87.89	51.23	45.63	67.07
Itgb3		NM_016780.2	NM_016780.2:2595	Endogenous	mRNA	100	60.06	56.73	84.33	86.97	41.91	35.1	55.34
Itgb4		NM_001005608.2	NM_001005608.2:3355	Endogenous	mRNA	100	126.52	146.55	173.04	185.96	68.69	72.55	112.35
Itgb6		NM_001159564.1	NM_001159564.1:555	Endogenous	mRNA	100	56.59	54.84	92	50.89	52.39	31.59	57.85
Itgb7		NM_013566.2	NM_013566.2:1221	Endogenous	mRNA	100	19.33	28.36	16.43	25.91	17.46	15.21	12.58
Itgb8		NM_177290.3	NM_177290.3:2405	Endogenous	mRNA	100	123.13	115.35	108.43	118.43	135.06	129.88	131.63
Jag1		NM_013822.2	NM_013822.2:2155	Endogenous	mRNA	100	171.29	178.7	312.13	252.58	101.29	74.89	108.16
Jag2		NM_010588.2	NM_010588.2:219	Endogenous	mRNA	100	26.24	23.64	39.43	35.16	31.44	9.36	18.45
Jak1		NM_146145.2	NM_146145.2:4080	Endogenous	mRNA	100	1219.93	1283.03	1208.01	1141.69	1122.39	1253.18	1311.29
Jak2		NM_008413.2	NM_008413.2:1049	Endogenous	mRNA	100	492.4	598.49	461.08	533.84	450.59	461.02	449.39
Jak3		NM_010589.5	NM_010589.5:145	Endogenous	mRNA	100	83.98	91.71	77.76	106.4	76.84	80.74	70.43
Jun		NM_010591.2	NM_010591.2:2212	Endogenous	mRNA	100	500.8	537.04	585.94	562.52	386.55	403.69	529.04
Kat2b		NM_001190846.1	NM_001190846.1:622	Endogenous	mRNA	100	213.92	223.13	167.57	218.35	238.68	227	208.77
Kdm5c		NM_013668.3	NM_013668.3:750	Endogenous	mRNA	100	811.99	861.34	959.4	835.45	629.89	779.29	806.56
Kdm6a		NM_009483.1	NM_009483.1:2560	Endogenous	mRNA	100	175.28	185.32	150.04	150.81	186.29	181.37	197.87
Kdr		NM_010612.2	NM_010612.2:995	Endogenous	mRNA	100	171.3	196.66	228.9	190.59	101.29	160.3	150.08
Kit		NM_001122733.1	NM_001122733.1:4275	Endogenous	mRNA	100	126.09	123.86	100.76	112.87	112.94	139.24	166.85
Kitl		NM_013598.1	NM_013598.1:280	Endogenous	mRNA	100	438.27	456.67	350.47	402.46	495.99	503.15	420.89
Klf4		NM_010637.3	NM_010637.3:2397	Endogenous	mRNA	100	1118.01	1228.19	2060.08	1551.56	553.04	457.51	857.71
Kmt2c		NM_001081383.1	NM_001081383.1:7075	Endogenous	mRNA	100	94.96	90.77	111.71	86.04	80.34	105.31	95.58
Kmt2d		NM_001033276.1	NM_001033276.1:2736	Endogenous	mRNA	100	208.48	232.59	235.47	240.55	175.81	183.71	182.78
Kras		NM_021284.5	NM_021284.5:2620	Endogenous	mRNA	100	102.74	127.64	98.57	91.59	125.74	59.68	113.19
Lama1		NM_008480.2	NM_008480.2:1302	Endogenous	mRNA	100	30.3	17.02	33.95	25.91	30.27	50.31	24.31
Lama3		NM_010680.1	NM_010680.1:7600	Endogenous	mRNA	100	162.98	170.19	323.09	246.1	75.68	59.68	103.13
Lama5		NM_001081171.2	NM_001081171.2:4054	Endogenous	mRNA	100	47.62	51.06	71.19	69.39	26.78	24.57	42.76
Lamb3		NM_008484.2	NM_008484.2:718	Endogenous	mRNA	100	232.92	234.48	313.23	238.7	169.99	177.86	263.26
Lamc2		NM_008485.3	NM_008485.3:1295	Endogenous	mRNA	100	333.12	333.76	584.84	531.06	136.22	163.81	249.01
Lamc3		NM_011836.3	NM_011836.3:4896	Endogenous	mRNA	100	11.66	13.24	13.14	12.03	11.64	14.04	5.87
Lat		NM_010689.2	NM_010689.2:760	Endogenous	mRNA	100	13	18.91	12.05	11.1	11.64	11.7	12.58
Lef1		NM_010703.3	NM_010703.3:1337	Endogenous	mRNA	100	77.66	78.48	145.66	107.32	40.75	40.95	52.82
Lefty1		NM_010094.3	NM_010094.3:1255	Endogenous	mRNA	100	29.44	32.15	32.86	24.06	19.79	35.1	32.7
Lefty2		NM_177099.3	NM_177099.3:2120	Endogenous	mRNA	100	3.06	2.84	4.38	2.78	2.33	3.51	2.52
Lep		NM_008493.3	NM_008493.3:1115	Endogenous	mRNA	100	74.95	221.24	21.9	27.76	67.53	81.91	29.34
Lepr		NM_010704.2	NM_010704.2:600	Endogenous	mRNA	100	365.51	432.09	412.89	445.02	331.83	231.68	339.56
Lfng		NM_008494.3	NM_008494.3:1965	Endogenous	mRNA	100	438.11	485.98	487.37	583.8	388.88	322.95	359.68
Lgr5		NM_010195.2	NM_010195.2:2123	Endogenous	mRNA	100	18.19	23.64	28.48	13.88	10.48	17.55	15.09
Lif		NM_008501.2	NM_008501.2:3435	Endogenous	mRNA	100	35.51	39.71	61.33	54.59	27.94	9.36	20.12
Lifr		NM_001113386.1	NM_001113386.1:2466	Endogenous	mRNA	100	214.14	262.85	205.9	186.89	186.29	237.53	205.41
Lig4		NM_176953.3	NM_176953.3:1415	Endogenous	mRNA	100	86.23	77.53	95.28	99	76.84	86.59	82.17
Lrp2		NM_001081088.1	NM_001081088.1:2935	Endogenous	mRNA	83.33	5.28	6.62	7.67	1	5.82	4.68	5.87
Ltbp1		NM_019919.2	NM_019919.2:5280	Endogenous	mRNA	100	96.67	116.29	141.28	101.77	74.52	69.04	77.13
Mad2l2		NM_027985.2	NM_027985.2:565	Endogenous	mRNA	100	58.32	66.18	47.09	61.06	60.54	59.68	55.34
Maml2		NM_001013813.2	NM_001013813.2:5095	Endogenous	mRNA	100	127.79	128.59	123.76	112.87	118.76	142.75	140.02
Map2k1		NM_008927.3	NM_008927.3:1695	Endogenous	mRNA	100	434.47	403.72	450.13	490.35	406.34	406.03	450.23
Map2k2		NM_023138.4	NM_023138.4:1440	Endogenous	mRNA	100	504.72	500.16	530.08	534.76	462.23	520.7	480.42
Map2k4		NM_009157.4	NM_009157.4:1335	Endogenous	mRNA	100	395.36	398.05	447.94	426.52	358.61	360.39	380.64
Map2k6		NM_011943.2	NM_011943.2:320	Endogenous	mRNA	100	16.04	17.02	13.14	13.88	26.78	12.87	12.58
Map3k1		NM_011945.2	NM_011945.2:1640	Endogenous	mRNA	100	331.26	360.23	312.13	324.74	328.33	345.18	316.92
Map3k12		NM_009582.4	NM_009582.4:4720	Endogenous	mRNA	100	6.98	6.62	6.57	6.48	9.31	7.02	5.87
Map3k13		NM_172821.3	NM_172821.3:4764	Endogenous	mRNA	100	19.17	12.29	21.9	22.2	23.29	9.36	25.99
Map3k14		NM_016896.3	NM_016896.3:3930	Endogenous	mRNA	100	51.19	47.27	43.81	55.51	53.56	60.85	46.11
Map3k5		NM_008580.4	NM_008580.4:640	Endogenous	mRNA	100	141.32	160.73	146.76	155.43	123.42	118.18	143.37
Map3k7		NM_009316.1	NM_009316.1:822	Endogenous	mRNA	100	184.96	174.92	188.38	186.89	187.45	197.75	174.39
Map3k8		NM_007746.2	NM_007746.2:675	Endogenous	mRNA	100	119.29	136.15	147.85	134.15	97.8	92.44	107.32
Mapk1		NM_011949.3	NM_011949.3:1210	Endogenous	mRNA	100	940.67	958.72	961.59	945.55	918.63	886.94	972.57
Mapk10		NM_001081567.1	NM_001081567.1:1496	Endogenous	mRNA	100	13.18	10.4	10.95	12.95	16.3	17.55	10.9
Mapk12		NM_013871.3	NM_013871.3:1586	Endogenous	mRNA	100	15.2	19.86	13.14	11.1	16.3	19.89	10.9
Mapk3		NM_011952.2	NM_011952.2:825	Endogenous	mRNA	100	747.24	776.24	854.26	766.99	662.49	691.53	731.94
Mapk8		NM_016700.3	NM_016700.3:970	Endogenous	mRNA	100	260.84	237.32	249.71	263.68	307.38	250.4	256.56
Mapk8ip1		NM_001202445.1	NM_001202445.1:906	Endogenous	mRNA	100	32.75	35.93	27.38	30.53	39.59	36.27	26.83
Mapk8ip2		NM_021921.2	NM_021921.2:2370	Endogenous	mRNA	100	4.1	7.56	2.19	1.85	5.82	4.68	2.52
Mapk9		NM_001163672.1	NM_001163672.1:1635	Endogenous	mRNA	100	245.79	301.61	224.52	254.43	245.67	224.66	223.86
Mapt		NM_001038609.2	NM_001038609.2:1202	Endogenous	mRNA	100	12.23	12.29	20.81	19.43	10.48	1.17	9.22
Mcm2		NM_008564.2	NM_008564.2:2585	Endogenous	mRNA	100	74.23	85.09	64.62	77.72	59.38	77.23	81.33
Mcm4		NM_008565.3	NM_008565.3:3130	Endogenous	mRNA	100	553.82	524.75	592.51	558.82	516.95	513.68	616.24
Mcm5		NM_008566.2	NM_008566.2:2609	Endogenous	mRNA	100	33.97	30.26	35.05	37.93	27.94	37.44	35.21
Mcm7		NM_008568.2	NM_008568.2:2200	Endogenous	mRNA	100	505.28	453.83	486.27	539.39	512.29	462.19	577.67
Mdc1		NM_001010833.2	NM_001010833.2:5900	Endogenous	mRNA	100	92.83	86.04	69	106.4	65.2	120.52	109.83
Mdm2		NM_010786.3	NM_010786.3:515	Endogenous	mRNA	100	110.34	102.11	135.81	111.95	114.1	104.14	93.9
Mecom		NM_007963.2	NM_007963.2:728	Endogenous	mRNA	100	21.5	22.69	30.67	20.35	18.63	19.89	16.77
Med12		NM_021521.2	NM_021521.2:342	Endogenous	mRNA	100	189.8	205.17	203.71	211.87	178.14	152.11	187.81
Men1		NM_008583.2	NM_008583.2:733	Endogenous	mRNA	100	90.02	86.04	101.85	92.52	75.68	90.1	93.9
Met		NM_008591.1	NM_008591.1:3190	Endogenous	mRNA	100	288.31	241.1	205.9	180.41	308.54	393.16	400.77
Mfng		NM_008595.2	NM_008595.2:971	Endogenous	mRNA	100	37.94	46.33	38.33	27.76	39.59	47.97	27.67
Mgmt		NM_008598.2	NM_008598.2:350	Endogenous	mRNA	100	65.71	62.4	56.95	48.11	59.38	93.61	73.78
Mlf1		NM_001039543.2	NM_001039543.2:162	Endogenous	mRNA	100	68.34	57.67	77.76	88.82	86.16	52.65	46.95
Mlh1		NM_026810.2	NM_026810.2:1742	Endogenous	mRNA	100	97.08	99.28	67.9	84.19	110.61	100.63	119.89
Mllt3		NM_027326.3	NM_027326.3:4506	Endogenous	mRNA	100	77.68	69.97	78.85	79.57	64.04	83.08	90.55
Mllt4		NM_010806.1	NM_010806.1:1090	Endogenous	mRNA	100	380.92	393.32	513.65	420.96	314.36	272.63	370.58
Mmp3		NM_010809.1	NM_010809.1:1575	Endogenous	mRNA	100	2221.66	3027.45	2525.55	2142.76	1846.58	2134.27	1653.37
Mmp7		NM_010810.4	NM_010810.4:350	Endogenous	mRNA	100	44.9	52.95	62.43	67.54	40.75	22.23	23.48
Mmp9		NM_013599.2	NM_013599.2:1570	Endogenous	mRNA	100	115.63	124.8	215.76	174.86	53.56	46.8	77.97
Mnat1		NM_008612.2	NM_008612.2:914	Endogenous	mRNA	100	214.36	186.26	200.42	209.09	270.12	193.07	227.21
Mpl		NM_001122949.1	NM_001122949.1:295	Endogenous	mRNA	100	8.51	7.56	15.33	11.1	5.82	7.02	4.19
Mpo		NM_010824.2	NM_010824.2:1645	Endogenous	mRNA	100	85.69	219.35	66.81	67.54	88.49	46.8	25.15
Msh2		NM_008628.2	NM_008628.2:1870	Endogenous	mRNA	100	223	218.41	205.9	205.39	218.89	232.85	256.56
Msh6		NM_010830.1	NM_010830.1:4050	Endogenous	mRNA	100	254.8	243.94	266.14	251.65	235.19	276.15	255.72
Mtor		NM_020009.2	NM_020009.2:2432	Endogenous	mRNA	100	90.49	80.37	111.71	86.97	94.31	80.74	88.87
Mutyh		NM_001159581.1	NM_001159581.1:709	Endogenous	mRNA	100	12.28	8.51	17.52	7.4	16.3	10.53	13.41
Myb		NM_010848.3	NM_010848.3:1744	Endogenous	mRNA	100	10.78	8.51	14.24	12.03	9.31	10.53	10.06
Myc		NM_010849.4	NM_010849.4:630	Endogenous	mRNA	100	399.27	375.36	436.99	426.52	394.7	342.84	419.21
Mycn		NM_008709.3	NM_008709.3:2080	Endogenous	mRNA	100	41.37	59.57	52.57	54.59	27.94	29.25	24.31
Myd88		NM_010851.2	NM_010851.2:1595	Endogenous	mRNA	100	315.54	338.48	335.13	358.98	243.34	293.7	323.63
Nasp		NM_001081475.1	NM_001081475.1:1118	Endogenous	mRNA	100	541.85	449.11	485.18	585.65	698.58	475.06	557.55
Nbn		NM_013752.3	NM_013752.3:1000	Endogenous	mRNA	100	151.7	118.19	145.66	136.93	186.29	157.96	165.17
Ncor1		NM_011308.2	NM_011308.2:211	Endogenous	mRNA	100	297.01	294.05	294.61	303.46	313.2	298.38	278.36
Nf1		NM_010897.2	NM_010897.2:2705	Endogenous	mRNA	100	113.93	128.59	89.81	109.17	110.61	132.22	113.19
Nf2		NM_001252252.1	NM_001252252.1:2016	Endogenous	mRNA	100	303.69	334.7	291.32	300.69	270.12	315.93	309.38
Nfatc1		NM_016791.4	NM_016791.4:1570	Endogenous	mRNA	100	48	59.57	60.24	59.21	30.27	35.1	43.6
Nfe2l2		NR_132727.1	NR_132727.1:144	Endogenous	mRNA	100	91.66	104	101.85	116.57	74.52	72.55	80.49
Nfkb1		NM_008689.2	NM_008689.2:2125	Endogenous	mRNA	100	225.21	245.83	271.61	270.16	164.17	196.58	202.9
Nfkbia		NM_010907.1	NM_010907.1:940	Endogenous	mRNA	100	990.4	994.65	1121.49	1081.56	879.05	754.72	1110.91
Nfkbiz		NM_030612.1	NM_030612.1:1305	Endogenous	mRNA	100	181.08	153.17	237.66	185.96	172.32	157.96	179.42
Ngf		NM_001112698.1	NM_001112698.1:630	Endogenous	mRNA	100	15.95	17.96	19.71	21.28	10.48	12.87	13.41
Ngfr		NM_033217.3	NM_033217.3:1995	Endogenous	mRNA	100	20.92	28.36	18.62	18.5	12.81	24.57	22.64
Nkd1		NM_027280.3	NM_027280.3:2305	Endogenous	mRNA	100	21	23.64	30.67	17.58	15.14	22.23	16.77
Nodal		NM_013611.4	NM_013611.4:1975	Endogenous	mRNA	100	5.94	1.89	9.86	3.7	6.99	8.19	5.03
Nog		NM_008711.2	NM_008711.2:895	Endogenous	mRNA	100	13.28	12.29	9.86	23.13	12.81	14.04	7.55
Nos3		NM_008713.4	NM_008713.4:3613	Endogenous	mRNA	100	26.89	35.93	26.28	24.98	26.78	28.08	19.28
Notch1		NM_008714.2	NM_008714.2:1425	Endogenous	mRNA	100	226.96	236.37	301.18	275.71	168.82	147.43	232.24
Notch2		NM_010928.1	NM_010928.1:5110	Endogenous	mRNA	100	150	179.64	187.28	156.36	105.95	118.18	152.59
Notch3		NM_008716.2	NM_008716.2:550	Endogenous	mRNA	100	37.94	40.66	46	38.86	29.11	32.76	40.24
Npm1		NM_008722.2	NM_008722.2:657	Endogenous	mRNA	100	5202.09	4197.96	5114.61	4981.26	6747.13	4575.12	5596.47
Npm2		NM_181345.3	NM_181345.3:190	Endogenous	mRNA	100	7.28	5.67	8.76	6.48	3.49	11.7	7.55
Nr4a1		NM_010444.1	NM_010444.1:1315	Endogenous	mRNA	100	45.75	39.71	58.05	56.44	39.59	30.42	50.31
Nr4a3		NM_015743.3	NM_015743.3:1640	Endogenous	mRNA	100	7.36	12.29	7.67	4.63	4.66	8.19	6.71
Nras		NM_010937.2	NM_010937.2:3665	Endogenous	mRNA	100	391.46	426.41	412.89	443.17	378.4	303.06	384.84
Nsd1		NM_008739.3	NM_008739.3:5035	Endogenous	mRNA	100	288.87	290.26	291.32	310.87	313.2	260.93	266.62
Ntf3		NM_008742.2	NM_008742.2:305	Endogenous	mRNA	100	6.6	2.84	10.95	9.25	4.66	3.51	8.38
Nthl1		NM_008743.2	NM_008743.2:34	Endogenous	mRNA	100	40.24	31.2	39.43	26.83	54.72	39.78	49.47
Ntrk1		NM_001033124.1	NM_001033124.1:1481	Endogenous	mRNA	100	5.46	3.78	5.48	8.33	5.82	3.51	5.87
Ntrk2		NM_001025074.1	NM_001025074.1:1345	Endogenous	mRNA	100	98.29	164.51	83.24	85.12	69.86	100.63	86.36
Numbl		NM_010950.2	NM_010950.2:443	Endogenous	mRNA	100	40.68	42.55	49.28	57.36	34.93	28.08	31.86
Nupr1		NM_019738.1	NM_019738.1:375	Endogenous	mRNA	100	429.55	458.56	456.7	420.96	357.44	437.62	446.04
Osm		NM_001013365.2	NM_001013365.2:579	Endogenous	mRNA	100	41.21	42.55	31.76	39.78	38.42	44.46	50.31
Pak3		NM_001195046.1	NM_001195046.1:7304	Endogenous	mRNA	100	28.57	30.26	47.09	34.23	18.63	21.06	20.12
Pak7		NM_172858.2	NM_172858.2:2442	Endogenous	mRNA	100	9.4	10.4	13.14	4.63	5.82	14.04	8.38
Pax3		NM_001159520.1	NM_001159520.1:731	Endogenous	mRNA	100	6.54	2.84	6.57	6.48	6.99	10.53	5.87
Pax5		NM_008782.2	NM_008782.2:90	Endogenous	mRNA	100	7.57	11.35	9.86	3.7	9.31	7.02	4.19
Pax8		NM_011040.4	NM_011040.4:1664	Endogenous	mRNA	100	14.36	12.29	8.76	14.8	16.3	16.38	17.61
Pbrm1		NM_001081251.1	NM_001081251.1:5160	Endogenous	mRNA	100	214.87	179.64	223.42	209.09	232.86	203.6	240.63
Pbx1		NM_008783.2	NM_008783.2:951	Endogenous	mRNA	100	135.89	130.48	162.09	148.03	110.61	106.48	157.62
Pbx3		NM_016768.1	NM_016768.1:1430	Endogenous	mRNA	100	77.88	84.15	89.81	92.52	67.53	62.02	71.27
Pck1		NM_011044.2	NM_011044.2:1045	Endogenous	mRNA	100	96.26	76.58	39.43	15.73	74.52	304.23	67.07
Pcna		NM_011045.2	NM_011045.2:590	Endogenous	mRNA	100	2058.08	1840.86	1850.9	1821.71	2484.62	2182.25	2168.16
Pdgfa		NM_008808.3	NM_008808.3:805	Endogenous	mRNA	100	302.39	308.23	393.18	414.49	223.55	202.43	272.49
Pdgfb		NM_011057.3	NM_011057.3:2325	Endogenous	mRNA	100	138.97	163.57	163.19	190.59	105.95	88.93	121.57
Pdgfc		NM_019971.2	NM_019971.2:1165	Endogenous	mRNA	100	686.35	598.49	646.17	754.96	803.37	649.41	665.71
Pdgfd		NM_027924.2	NM_027924.2:156	Endogenous	mRNA	100	58.99	69.97	66.81	57.36	57.05	66.7	36.05
Pdgfra		NM_001083316.1	NM_001083316.1:2520	Endogenous	mRNA	100	410.49	602.28	453.42	497.76	245.67	339.33	324.47
Pdgfrb		NM_008809.1	NM_008809.1:1185	Endogenous	mRNA	100	41.18	52.95	67.9	32.38	32.6	32.76	28.51
Pgf		NM_008827.2	NM_008827.2:465	Endogenous	mRNA	100	33.64	38.76	39.43	37.01	34.93	25.74	25.99
Phf6		NM_027642.1	NM_027642.1:2050	Endogenous	mRNA	100	163.31	164.51	144.57	170.24	197.93	124.03	178.58
Pias1		NM_019663.3	NM_019663.3:1290	Endogenous	mRNA	100	61.74	55.78	73.38	65.69	61.71	46.8	67.07
Pik3ca		NM_008839.1	NM_008839.1:1255	Endogenous	mRNA	100	416.96	425.47	424.94	422.82	461.06	370.92	396.57
Pik3cb		NM_029094.3	NM_029094.3:1970	Endogenous	mRNA	100	497.28	533.25	569.51	524.59	415.66	431.77	508.92
Pik3cd		XM_003945690.1	XM_003945690.1:4648	Endogenous	mRNA	100	102.41	121.97	115	142.48	84.99	73.72	76.3
Pik3cg		NM_020272.2	NM_020272.2:2890	Endogenous	mRNA	100	95.07	116.29	88.71	105.47	78.01	100.63	81.33
Pik3r1		NM_001024955.1	NM_001024955.1:5664	Endogenous	mRNA	100	637.88	676.02	406.32	489.43	733.51	826.1	695.89
Pik3r2		NM_008841.2	NM_008841.2:230	Endogenous	mRNA	100	262.65	282.7	280.37	280.33	230.53	238.7	263.26
Pik3r3		NM_181585.5	NM_181585.5:3090	Endogenous	mRNA	100	104.05	109.68	122.66	133.23	104.79	54.99	98.93
Pik3r5		NM_177320.2	NM_177320.2:3342	Endogenous	mRNA	100	57.07	65.24	63.52	49.04	44.24	60.85	59.53
Pim1		NM_008842.3	NM_008842.3:365	Endogenous	mRNA	100	85.6	96.44	97.47	110.1	58.22	72.55	78.81
Pitx2		NM_001042502.1	NM_001042502.1:1381	Endogenous	mRNA	100	8.65	9.45	9.86	5.55	8.15	10.53	8.38
Pkmyt1		NM_023058.3	NM_023058.3:322	Endogenous	mRNA	100	37.19	35.93	40.52	34.23	37.26	37.44	37.73
Pla1a		NM_134102.2	NM_134102.2:695	Endogenous	mRNA	100	151.19	163.57	191.66	101.77	112.94	166.16	171.04
Pla2g10		NM_011987.2	NM_011987.2:730	Endogenous	mRNA	100	4.19	3.78	7.67	1.85	4.66	4.68	2.52
Pla2g2a		NM_001082531.1	NM_001082531.1:220	Endogenous	mRNA	100	7.58	7.56	3.29	3.7	9.31	8.19	13.41
Pla2g3		NM_172791.2	NM_172791.2:2310	Endogenous	mRNA	100	7.13	8.51	5.48	11.1	8.15	7.02	2.52
Pla2g4a		NM_008869.2	NM_008869.2:1525	Endogenous	mRNA	100	94.69	77.53	106.24	114.72	115.27	71.38	83
Pla2g4c		NM_001168504.1	NM_001168504.1:2452	Endogenous	mRNA	100	21.94	25.53	29.57	22.2	13.97	21.06	19.28
Pla2g4e		NM_177845.4	NM_177845.4:1016	Endogenous	mRNA	100	32.6	31.2	72.28	37.93	11.64	14.04	28.51
Pla2g4f		NM_001024145.2	NM_001024145.2:2002	Endogenous	mRNA	100	49.22	45.38	115	49.04	23.29	25.74	36.89
Pla2g5		NM_001122954.1	NM_001122954.1:1540	Endogenous	mRNA	100	6.78	4.73	16.43	8.33	4.66	2.34	4.19
Plat		NM_008872.1	NM_008872.1:645	Endogenous	mRNA	100	114.72	122.91	128.14	163.76	93.14	77.23	103.13
Plau		NM_008873.2	NM_008873.2:1950	Endogenous	mRNA	100	184.72	228.81	187.28	238.7	157.18	152.11	144.21
Plcb1		NM_019677.1	NM_019677.1:495	Endogenous	mRNA	100	106.29	134.26	101.85	92.52	108.28	128.71	72.1
Plcb4		NM_013829.2	NM_013829.2:242	Endogenous	mRNA	100	113.02	108.73	94.19	75.87	143.21	146.26	109.83
Plce1		NM_019588.2	NM_019588.2:5810	Endogenous	mRNA	100	56.99	81.31	64.62	50.89	47.74	59.68	37.73
Plcg2		NM_172285.1	NM_172285.1:978	Endogenous	mRNA	100	428.74	479.36	408.51	436.69	386.55	332.31	529.04
Pld1		NM_001164056.1	NM_001164056.1:520	Endogenous	mRNA	100	97.76	92.66	112.81	92.52	78.01	115.84	94.74
Pml		NM_008884.5	NM_008884.5:616	Endogenous	mRNA	100	208.62	232.59	211.37	224.82	154.85	217.64	210.44
Polb		NM_011130.2	NM_011130.2:734	Endogenous	mRNA	100	471.78	417.91	479.7	544.02	525.1	403.69	460.29
Pold1		NM_011131.3	NM_011131.3:3052	Endogenous	mRNA	100	23.14	9.45	27.38	32.38	27.94	25.74	15.93
Pold4		NM_027196.3	NM_027196.3:779	Endogenous	mRNA	100	322.48	299.72	393.18	322.89	312.03	307.74	299.32
Pole2		NM_011133.2	NM_011133.2:343	Endogenous	mRNA	100	218.19	219.35	212.47	226.67	261.97	173.18	215.47
Polr2d		NM_027002.3	NM_027002.3:630	Endogenous	mRNA	100	321.13	334.7	337.32	300.69	349.29	293.7	311.05
Polr2h		NM_145632.2	NM_145632.2:100	Endogenous	mRNA	100	389.75	339.43	377.85	399.69	485.51	348.69	387.35
Polr2j		NM_011293.2	NM_011293.2:70	Endogenous	mRNA	100	427.94	417.91	429.32	445.02	466.89	400.18	408.31
Pparg		NM_011146.1	NM_011146.1:1060	Endogenous	mRNA	100	46.76	92.66	18.62	28.68	44.24	67.87	28.51
Ppargc1a		NM_008904.2	NM_008904.2:690	Endogenous	mRNA	100	20.42	28.36	13.14	15.73	22.12	22.23	20.96
Ppp2cb		NM_017374.3	NM_017374.3:1399	Endogenous	mRNA	100	431.88	445.32	489.56	472.78	408.67	355.71	419.21
Ppp2r1a		NM_016891.3	NM_016891.3:1559	Endogenous	mRNA	100	1005.87	934.14	1144.49	1131.52	866.24	915.02	1043.84
Ppp2r2b		NM_028392.3	NM_028392.3:522	Endogenous	mRNA	100	6.55	9.45	5.48	6.48	2.33	10.53	5.03
Ppp2r2c		NM_172994.2	NM_172994.2:3352	Endogenous	mRNA	100	6.03	5.67	8.76	5.55	6.99	5.85	3.35
Ppp3ca		NM_008913.4	NM_008913.4:1675	Endogenous	mRNA	100	367.65	395.21	348.28	366.38	372.58	342.84	380.64
Ppp3cb		NM_008914.1	NM_008914.1:290	Endogenous	mRNA	100	491.26	519.07	456.7	523.66	532.09	424.75	491.32
Ppp3cc		NM_008915.2	NM_008915.2:1020	Endogenous	mRNA	100	153.05	131.42	139.09	130.45	196.77	169.67	150.92
Ppp3r1		NM_024459.2	NM_024459.2:1390	Endogenous	mRNA	100	994.21	988.03	982.4	1064.9	1054.86	953.64	921.43
Ppp3r2		NM_001004025.4	NM_001004025.4:1500	Endogenous	mRNA	100	5	6.62	5.48	9.25	4.66	2.34	1.68
Prdm1		NM_007548.3	NM_007548.3:1440	Endogenous	mRNA	100	95.25	110.62	169.76	119.35	57.05	46.8	67.91
Prkaa2		NM_178143.1	NM_178143.1:1890	Endogenous	mRNA	100	51.41	50.11	27.38	35.16	66.37	63.19	66.24
Prkaca		NM_008854.3	NM_008854.3:699	Endogenous	mRNA	100	348.21	367.79	365.8	352.5	303.88	358.05	341.24
Prkacb		NM_011100.3	NM_011100.3:3754	Endogenous	mRNA	100	244.4	266.63	245.33	269.23	218.89	216.47	249.85
Prkar1b		NM_008923.2	NM_008923.2:1595	Endogenous	mRNA	100	35.74	44.44	42.71	49.96	27.94	23.4	25.99
Prkar2a		NM_008924.2	NM_008924.2:2135	Endogenous	mRNA	100	456.54	475.58	495.03	469.08	426.13	439.96	433.46
Prkar2b		NM_011158.3	NM_011158.3:1405	Endogenous	mRNA	100	392.78	591.87	252.99	252.58	373.74	592.07	293.45
Prkca		NM_011101.3	NM_011101.3:6965	Endogenous	mRNA	100	62.82	77.53	50.38	65.69	57.05	60.85	65.4
Prkcb		NM_008855.2	NM_008855.2:8332	Endogenous	mRNA	100	120.43	167.35	109.52	104.55	83.83	135.73	121.57
Prkcg		NM_011102.3	NM_011102.3:1580	Endogenous	mRNA	100	8.41	9.45	9.86	9.25	5.82	9.36	6.71
Prkdc		NM_011159.2	NM_011159.2:3108	Endogenous	mRNA	100	100.77	107.79	98.57	88.82	91.98	119.35	98.1
Prkx		NM_016979.1	NM_016979.1:665	Endogenous	mRNA	100	287.53	345.1	350.47	354.35	204.92	224.66	245.66
Prl		NM_011164.1	NM_011164.1:115	Endogenous	mRNA	100	4.29	3.78	4.38	5.55	2.33	4.68	5.03
Prlr		NM_011169.5	NM_011169.5:1375	Endogenous	mRNA	100	344.52	250.55	112.81	204.47	420.31	617.82	461.13
Prmt8		NM_201371.1	NM_201371.1:1510	Endogenous	mRNA	100	6.2	2.84	6.57	7.4	4.66	8.19	7.55
ProcR		NM_011171.1	NM_011171.1:305	Endogenous	mRNA	100	215.47	267.57	290.23	247.03	130.4	184.88	172.71
Prom1		NM_001163577.1	NM_001163577.1:2605	Endogenous	mRNA	100	211.91	191.93	188.38	225.75	227.04	209.45	228.89
Ptch1		NM_008957.2	NM_008957.2:3400	Endogenous	mRNA	100	89.21	105.89	113.9	132.3	59.38	43.29	80.49
Ptcra		NM_011195.2	NM_011195.2:968	Endogenous	mRNA	83.33	4.39	1	8.76	3.7	3.49	3.51	5.87
Pten		NM_008960.2	NM_008960.2:5160	Endogenous	mRNA	100	556.73	546.49	659.31	655.96	543.73	470.38	464.49
Ptk2		NM_007982.2	NM_007982.2:1060	Endogenous	mRNA	100	177.73	172.08	170.85	194.29	161.84	183.71	183.61
Ptpn11		NM_011202.3	NM_011202.3:3710	Endogenous	mRNA	100	243.65	248.66	272.71	291.44	206.08	214.13	228.89
Ptpn5		NM_001163565.1	NM_001163565.1:2770	Endogenous	mRNA	100	16.07	12.29	16.43	13.88	17.46	12.87	23.48
Ptprr		NM_011217.2	NM_011217.2:2624	Endogenous	mRNA	100	7.08	6.62	6.57	9.25	5.82	5.85	8.38
Rac1		NM_009007.2	NM_009007.2:1045	Endogenous	mRNA	100	1463.23	1650.82	1496.05	1568.21	1305.18	1318.71	1440.41
Rac2		NM_009008.3	NM_009008.3:2258	Endogenous	mRNA	100	43.19	48.22	39.43	44.41	44.24	46.8	36.05
Rac3		NM_133223.4	NM_133223.4:440	Endogenous	mRNA	100	56.48	54.84	62.43	63.84	69.86	40.95	46.95
Rad21		NM_009009.4	NM_009009.4:1216	Endogenous	mRNA	100	1413.98	1423.9	1622	1422.95	1281.9	1268.4	1464.72
Rad50		NM_009012.2	NM_009012.2:4165	Endogenous	mRNA	100	106.64	109.68	104.04	96.22	117.59	109.99	102.29
Rad51		NM_011234.4	NM_011234.4:286	Endogenous	mRNA	100	135.93	126.7	121.57	97.15	174.65	146.26	149.24
Rad52		NM_001166381.1	NM_001166381.1:312	Endogenous	mRNA	100	91.73	90.77	79.95	87.89	105.95	93.61	92.23
Raf1		NM_029780.3	NM_029780.3:550	Endogenous	mRNA	100	484.99	493.54	504.89	484.8	500.65	448.15	477.9
Rasa4		NM_001039103.2	NM_001039103.2:1781	Endogenous	mRNA	100	20.77	22.69	32.86	19.43	12.81	17.55	19.28
Rasal1		NM_013832.4	NM_013832.4:1488	Endogenous	mRNA	100	45.7	35.93	27.38	41.63	50.07	59.68	59.53
Rasgrf1		NM_011245.2	NM_011245.2:158	Endogenous	mRNA	100	6.01	4.73	8.76	1.85	8.15	5.85	6.71
Rasgrf2		NM_009027.3	NM_009027.3:432	Endogenous	mRNA	100	32.21	74.69	12.05	19.43	24.45	31.59	31.02
Rasgrp1		NM_011246.2	NM_011246.2:2815	Endogenous	mRNA	100	22.88	26.47	28.48	16.65	19.79	19.89	25.99
Rasgrp2		NM_011242.2	NM_011242.2:580	Endogenous	mRNA	100	37.52	53.89	33.95	39.78	36.09	36.27	25.15
Rb1		NM_009029.2	NM_009029.2:1590	Endogenous	mRNA	100	1268.18	1154.44	1005.4	1177.78	1497.29	1386.58	1387.59
Rbx1		NM_019712.3	NM_019712.3:1040	Endogenous	mRNA	100	195.77	203.28	194.95	197.07	202.59	181.37	195.35
Rel		NM_009044.2	NM_009044.2:1290	Endogenous	mRNA	100	107.72	116.29	124.85	127.68	93.14	79.57	104.8
Rela		NM_009045.4	NM_009045.4:645	Endogenous	mRNA	100	165.56	173.97	179.61	199.84	138.55	146.26	155.11
Reln		NM_011261.2	NM_011261.2:2545	Endogenous	mRNA	100	16.18	14.18	21.9	15.73	19.79	12.87	12.58
Ret		NM_001080780.1	NM_001080780.1:5175	Endogenous	mRNA	100	68.06	33.09	14.24	23.13	117.59	120.52	99.77
Rfc3		NM_027009.2	NM_027009.2:1014	Endogenous	mRNA	100	85.98	72.8	81.05	85.12	101.29	90.1	85.52
Rfc4		NM_145480.1	NM_145480.1:230	Endogenous	mRNA	100	102.18	85.09	93.09	75.87	163	97.12	98.93
Rhoa		NM_016802.4	NM_016802.4:1885	Endogenous	mRNA	100	2027.13	2151.93	2180.56	2184.39	1777.89	1855.79	2012.21
Rin1		NM_145495.2	NM_145495.2:3820	Endogenous	mRNA	100	15.57	14.18	15.33	23.13	11.64	14.04	15.09
Rnf43		NM_172448.3	NM_172448.3:3395	Endogenous	mRNA	100	56.3	47.27	52.57	62.91	65.2	56.17	53.66
Rpa3		NM_026632.4	NM_026632.4:0	Endogenous	mRNA	100	318.03	296.88	290.23	352.5	387.71	259.76	321.12
Rps27a		NM_024277.2	NM_024277.2:96	Endogenous	mRNA	100	10.52	13.24	16.43	5.55	10.48	8.19	9.22
Rps6ka5		NM_153587.2	NM_153587.2:2755	Endogenous	mRNA	100	73.2	40.66	59.14	65.69	107.12	81.91	84.68
Rps6ka6		NM_025949.2	NM_025949.2:2415	Endogenous	mRNA	100	64.74	53.89	82.14	87.89	66.37	44.46	53.66
Rras2		NM_025846.2	NM_025846.2:1865	Endogenous	mRNA	100	446.31	458.56	520.22	475.55	441.27	319.44	462.81
Runx1		NM_001111021.1	NM_001111021.1:3055	Endogenous	mRNA	100	984.66	1142.15	1314.25	1243.47	685.77	620.16	902.14
Runx1t1		NM_001111026.1	NM_001111026.1:5295	Endogenous	mRNA	100	17.54	9.45	20.81	17.58	24.45	18.72	14.25
Rxrg		NM_001159731.1	NM_001159731.1:1474	Endogenous	mRNA	100	6.36	6.62	3.29	5.55	11.64	9.36	1.68
Setbp1		NM_053099.2	NM_053099.2:5630	Endogenous	mRNA	100	46.81	54.84	70.09	58.29	17.46	37.44	42.76
Setd2		NM_001081340.2	NM_001081340.2:1345	Endogenous	mRNA	100	414.51	443.43	403.04	370.08	433.12	383.79	453.59
Sf3b1		NM_031179.2	NM_031179.2:65	Endogenous	mRNA	100	343.57	354.56	336.23	341.4	388.88	277.32	363.04
Sfn		NM_018754.2	NM_018754.2:42	Endogenous	mRNA	100	10.67	12.29	15.33	12.03	8.15	7.02	9.22
Sfrp1		NM_013834.2	NM_013834.2:2505	Endogenous	mRNA	100	292.81	410.34	354.85	385.81	174.65	181.37	249.85
Sfrp2		NM_009144.2	NM_009144.2:689	Endogenous	mRNA	100	142.5	136.15	109.52	296.06	109.44	77.23	126.6
Sfrp4		NM_016687.2	NM_016687.2:895	Endogenous	mRNA	100	154.76	219.35	155.52	157.28	97.8	127.54	171.04
Sgk2		NM_001291152.1	NM_001291152.1:478	Endogenous	mRNA	100	5.5	6.62	8.76	2.78	5.82	2.34	6.71
Shc1		NM_011368.4	NM_011368.4:235	Endogenous	mRNA	100	243	281.76	250.8	240.55	237.52	217.64	229.73
Shc2		NM_001024539.1	NM_001024539.1:2716	Endogenous	mRNA	100	41.97	50.11	54.76	38.86	30.27	40.95	36.89
Shc3		NM_009167.3	NM_009167.3:830	Endogenous	mRNA	83.33	3.27	1	2.19	5.55	4.66	1.17	5.03
Shc4		NM_199022.2	NM_199022.2:2944	Endogenous	mRNA	100	24.6	19.86	30.67	17.58	26.78	23.4	29.34
Sin3a		NM_001110350.1	NM_001110350.1:3585	Endogenous	mRNA	100	227	258.12	209.18	213.72	222.38	218.81	239.79
Sirt4		XM_485674.5	XM_485674.5:565	Endogenous	mRNA	100	35.19	33.09	40.52	31.46	34.93	35.1	36.05
Six1		NM_009189.2	NM_009189.2:2291	Endogenous	mRNA	100	16.04	27.42	25.19	10.18	6.99	16.38	10.06
Skp1a		NM_011543.4	NM_011543.4:490	Endogenous	mRNA	100	1745.55	1792.64	1877.18	1816.16	1715.02	1570.28	1702
Skp2		NM_013787.2	NM_013787.2:790	Endogenous	mRNA	100	37.54	28.36	42.71	37.01	37.26	30.42	49.47
Smad1		NM_008539.3	NM_008539.3:240	Endogenous	mRNA	100	185.99	171.13	221.23	195.22	202.59	128.71	197.03
Smad2		NM_010754.4	NM_010754.4:880	Endogenous	mRNA	100	85.26	77.53	97.47	82.34	89.65	80.74	83.84
Smad3		NM_016769.3	NM_016769.3:1845	Endogenous	mRNA	100	237.62	216.52	231.09	235	246.83	242.21	254.04
Smad4		NM_008540.2	NM_008540.2:2885	Endogenous	mRNA	100	324.42	316.74	338.42	365.45	328.33	283.17	314.41
Smad9		NM_019483.4	NM_019483.4:2573	Endogenous	mRNA	100	11.56	13.24	14.24	15.73	16.3	2.34	7.55
Smarca4		NM_011417.2	NM_011417.2:3540	Endogenous	mRNA	100	417.37	447.22	501.6	429.29	349.29	347.52	429.27
Smarcb1		NM_001161853.1	NM_001161853.1:216	Endogenous	mRNA	100	104.81	112.51	127.04	123.98	83.83	90.1	91.39
Smc1a		NM_019710.2	NM_019710.2:388	Endogenous	mRNA	100	575.27	559.73	565.13	561.59	583.32	587.39	594.44
Smc1b		NM_080470.1	NM_080470.1:1866	Endogenous	mRNA	100	5.79	2.84	6.57	6.48	10.48	5.85	2.52
Smc3		NM_007790.3	NM_007790.3:1885	Endogenous	mRNA	100	630.51	612.68	611.13	595.83	721.87	585.05	656.48
Smo		NM_176996.4	NM_176996.4:1430	Endogenous	mRNA	100	52.95	47.27	69	49.04	47.74	46.8	57.85
Snai1		NM_011427.2	NM_011427.2:910	Endogenous	mRNA	100	36.62	35.93	41.62	51.81	32.6	35.1	22.64
Socs1		NM_009896.2	NM_009896.2:1020	Endogenous	mRNA	100	46.57	73.75	49.28	49.04	47.74	26.91	32.7
Socs2		NM_001168655.1	NM_001168655.1:626	Endogenous	mRNA	100	228.65	268.52	315.42	292.36	165.33	135.73	194.51
Socs3		NM_007707.2	NM_007707.2:585	Endogenous	mRNA	100	55.15	64.29	74.47	70.31	41.91	30.42	49.47
Sos1		NM_009231.2	NM_009231.2:6002	Endogenous	mRNA	100	190.76	170.19	205.9	191.52	178.14	200.09	198.71
Sos2		NM_001135559.1	NM_001135559.1:1180	Endogenous	mRNA	100	146.83	160.73	151.14	164.69	140.88	131.05	132.47
Sost		NM_024449.4	NM_024449.4:975	Endogenous	mRNA	100	12.51	11.35	10.95	13.88	22.12	5.85	10.9
Sox17		NM_011441.4	NM_011441.4:2150	Endogenous	mRNA	100	23.79	22.69	27.38	28.68	18.63	26.91	18.45
Sox9		NM_011448.4	NM_011448.4:3540	Endogenous	mRNA	100	220.34	192.88	186.19	197.07	258.48	214.13	273.33
Sp1		NM_013672.2	NM_013672.2:6580	Endogenous	mRNA	100	251.38	239.21	306.66	261.83	246.83	222.32	231.4
Spop		NM_025287.2	NM_025287.2:2525	Endogenous	mRNA	100	184.11	187.21	224.52	190.59	163	170.84	168.52
Spp1		NM_009263.3	NM_009263.3:420	Endogenous	mRNA	100	60185.3	35958.8	33230.8	48098.2	82581.6	98556.9	62685.5
Spry1		NM_011896.2	NM_011896.2:1610	Endogenous	mRNA	100	57.35	62.4	92	61.06	47.74	33.93	46.95
Spry2		NM_011897.3	NM_011897.3:1076	Endogenous	mRNA	100	166.44	176.81	202.61	166.54	168.82	111.16	172.71
Spry4		NM_011898.2	NM_011898.2:1726	Endogenous	mRNA	100	64.89	64.29	76.66	66.61	60.54	60.85	60.37
Srsf2		NM_011358.2	NM_011358.2:1530	Endogenous	mRNA	100	2022.11	2020.51	2004.23	1924.41	2151.63	1940.04	2091.86
Stag2		NM_001077712.1	NM_001077712.1:565	Endogenous	mRNA	100	643.49	604.17	582.65	587.5	854.6	616.65	615.4
Stat1		NM_009283.3	NM_009283.3:1590	Endogenous	mRNA	100	288.77	478.42	244.23	332.15	190.95	232.85	254.04
Stat3		NM_213659.2	NM_213659.2:2130	Endogenous	mRNA	100	1462.63	1411.61	1501.53	1616.32	1277.24	1426.36	1542.7
Stat4		NM_011487.4	NM_011487.4:1816	Endogenous	mRNA	100	15.49	15.13	14.24	14.8	13.97	16.38	18.45
Stk11		NM_011492.3	NM_011492.3:395	Endogenous	mRNA	100	571.74	563.51	537.75	492.2	587.97	664.62	584.38
Stk4		NM_021420.3	NM_021420.3:730	Endogenous	mRNA	100	213.38	220.3	251.9	236.85	190.95	173.18	207.09
Stmn1		NM_019641.3	NM_019641.3:595	Endogenous	mRNA	100	2082.65	1810.61	1992.18	1954.94	2574.27	1722.4	2441.49
Sufu		NM_001025391.1	NM_001025391.1:465	Endogenous	mRNA	100	221.32	224.08	215.76	238.7	227.04	170.84	251.53
Suv39h2		NM_022724.3	NM_022724.3:815	Endogenous	mRNA	100	70.2	51.06	83.24	57.36	72.19	87.76	69.59
Syk		NM_011518.2	NM_011518.2:3970	Endogenous	mRNA	100	229.05	260.01	277.09	278.48	179.3	179.03	200.38
Tbl1xr1		NM_030732.3	NM_030732.3:4665	Endogenous	mRNA	100	192.57	183.42	213.57	222.05	190.95	162.64	182.78
Tcf3		NM_001164147.1	NM_001164147.1:3080	Endogenous	mRNA	100	9.1	5.67	10.95	11.1	11.64	9.36	5.87
Tcf7l1		NM_001079822.2	NM_001079822.2:2570	Endogenous	mRNA	100	35.08	43.49	25.19	44.41	33.76	29.25	34.38
Tet2		NM_001040400.2	NM_001040400.2:2485	Endogenous	mRNA	100	112.08	90.77	131.42	136.93	95.47	85.42	132.47
Tfdp1		NM_009361.2	NM_009361.2:132	Endogenous	mRNA	100	1086.96	1112.84	1137.92	1134.29	1143.34	918.53	1074.86
Tgfb1		NM_011577.1	NM_011577.1:1470	Endogenous	mRNA	100	481.9	578.64	607.84	598.6	298.06	358.05	450.23
Tgfb2		NM_009367.1	NM_009367.1:1685	Endogenous	mRNA	100	162.99	111.57	84.33	135.08	225.87	210.62	210.44
Tgfb3		NM_009368.2	NM_009368.2:2410	Endogenous	mRNA	100	420.68	426.41	395.37	494.06	323.68	408.37	476.22
Tgfbr1		NM_009370.2	NM_009370.2:4425	Endogenous	mRNA	100	645.55	625.91	659.31	662.44	650.85	628.35	646.42
Tgfbr2		NM_009371.2	NM_009371.2:475	Endogenous	mRNA	100	755.54	956.83	727.22	865.98	480.86	718.45	783.92
Thbs1		NM_011580.3	NM_011580.3:3	Endogenous	mRNA	100	261.98	215.57	305.56	319.19	220.05	239.87	271.65
Thbs4		NM_011582.3	NM_011582.3:1128	Endogenous	mRNA	100	11.89	17.02	18.62	10.18	6.99	15.21	3.35
Them4		NM_029431.1	NM_029431.1:360	Endogenous	mRNA	100	96.31	87.93	129.23	114.72	100.13	67.87	77.97
Tiam1		NM_009384.2	NM_009384.2:7055	Endogenous	mRNA	100	200.89	195.72	283.66	269.23	164.17	118.18	174.39
Tlr2		NM_011905.2	NM_011905.2:255	Endogenous	mRNA	100	69.51	73.75	67.9	74.02	54.72	73.72	72.94
Tlr4		NM_021297.2	NM_021297.2:2510	Endogenous	mRNA	100	281.18	300.66	257.37	278.48	324.84	257.42	268.3
Tlx1		NM_021901.3	NM_021901.3:1146	Endogenous	mRNA	100	5.08	2.84	4.38	7.4	5.82	5.85	4.19
Tmprss2		NM_015775.2	NM_015775.2:2500	Endogenous	mRNA	100	70.64	62.4	76.66	49.96	83.83	77.23	73.78
Tnc		NM_011607.1	NM_011607.1:5665	Endogenous	mRNA	100	2390.61	2509.32	4174.93	4712.03	834.8	507.83	1604.74
Tnf		NM_013693.1	NM_013693.1:1135	Endogenous	mRNA	100	22.28	23.64	24.09	30.53	23.29	12.87	19.28
Tnfaip3		NM_009397.2	NM_009397.2:232	Endogenous	mRNA	100	142.67	139.93	190.57	166.54	103.62	105.31	150.08
Tnfrsf10b		NM_020275.3	NM_020275.3:1625	Endogenous	mRNA	100	63.16	65.24	82.14	59.21	40.75	56.17	75.46
Tnfsf10		NM_009425.2	NM_009425.2:2055	Endogenous	mRNA	100	81.82	98.33	71.19	93.44	89.65	73.72	64.56
Tnn		NM_177839.2	NM_177839.2:4655	Endogenous	mRNA	100	12.66	12.29	19.71	21.28	10.48	4.68	7.55
Tnr		NM_022312.3	NM_022312.3:5290	Endogenous	mRNA	100	10.68	9.45	12.05	12.03	11.64	10.53	8.38
Top2a		NM_011623.2	NM_011623.2:1953	Endogenous	mRNA	100	664.29	627.8	753.5	663.37	757.96	503.15	679.96
Tpo		NM_009417.2	NM_009417.2:688	Endogenous	mRNA	100	6.53	10.4	5.48	2.78	8.15	8.19	4.19
Traf7		NM_153792.1	NM_153792.1:1780	Endogenous	mRNA	100	333.83	351.72	398.66	389.51	286.42	259.76	316.92
Trp53		NM_011640.1	NM_011640.1:1835	Endogenous	mRNA	100	106.42	111.57	127.04	112.87	87.32	98.29	101.45
Tsc1		NM_022887.3	NM_022887.3:4645	Endogenous	mRNA	100	88.89	96.44	78.85	95.3	89.65	84.25	88.87
Tsc2		NM_001039363.1	NM_001039363.1:1554	Endogenous	mRNA	100	89.96	107.79	106.24	88.82	78.01	72.55	86.36
Tshr		NM_001113404.1	NM_001113404.1:581	Endogenous	mRNA	100	66.06	149.39	29.57	13.88	44.24	118.18	41.08
Tslp		NM_021367.1	NM_021367.1:638	Endogenous	mRNA	100	28.72	36.87	19.71	30.53	32.6	25.74	26.83
Tspan7		NM_019634.2	NM_019634.2:670	Endogenous	mRNA	100	163.46	146.55	192.76	185.96	138.55	162.64	154.27
Ttk		NM_009445.2	NM_009445.2:1290	Endogenous	mRNA	100	74.61	67.13	79.95	60.14	103.62	53.82	83
U2af1		NM_001163769.1	NM_001163769.1:750	Endogenous	mRNA	100	1353.32	1370.01	1284.68	1324.88	1427.43	1247.33	1465.56
Ubb		NM_011664.3	NM_011664.3:251	Endogenous	mRNA	100	13943.8	13958.2	13909.1	13976	13596.7	13634.1	14588.5
Ube2t		NM_001278115.1	NM_001278115.1:348	Endogenous	mRNA	100	72.76	45.38	65.71	55.51	115.27	78.4	76.3
Uty		NM_009484.2	NM_009484.2:3530	Endogenous	mRNA	100	8.82	10.4	9.86	6.48	9.31	15.21	1.68
Vegfa		NM_001025250.3	NM_001025250.3:3015	Endogenous	mRNA	100	205.58	189.1	234.37	217.42	181.63	228.17	182.78
Vegfb		NM_011697.2	NM_011697.2:1110	Endogenous	mRNA	100	250.4	291.21	194.95	205.39	241.01	312.42	257.4
Vegfc		NM_009506.2	NM_009506.2:1320	Endogenous	mRNA	100	76.54	80.37	99.66	100.85	47.74	58.51	72.1
Vhl		NM_009507.3	NM_009507.3:820	Endogenous	mRNA	100	36.08	45.38	33.95	37.01	44.24	31.59	24.31
Wee1		NM_009516.3	NM_009516.3:845	Endogenous	mRNA	100	65.64	53.89	59.14	45.33	88.49	69.04	77.97
Whsc1		NM_001081102.2	NM_001081102.2:890	Endogenous	mRNA	100	402.5	350.78	396.46	441.32	447.09	391.99	387.35
Whsc1l1		NM_001001735.1	NM_001001735.1:670	Endogenous	mRNA	100	635.18	637.26	649.46	680.02	646.19	571.01	627.14
Wif1		NM_011915.1	NM_011915.1:620	Endogenous	mRNA	100	288.67	340.38	561.84	351.58	138.55	121.69	217.99
Wnt1		NM_021279.4	NM_021279.4:2188	Endogenous	mRNA	100	3.97	4.73	3.29	4.63	5.82	1.17	4.19
Wnt10a		NM_009518.1	NM_009518.1:2321	Endogenous	mRNA	100	32.66	25.53	64.62	50.89	23.29	8.19	23.48
Wnt10b		NM_011718.1	NM_011718.1:1750	Endogenous	mRNA	100	34.82	50.11	63.52	33.31	16.3	22.23	23.48
Wnt11		NM_001285792.1	NM_001285792.1:1782	Endogenous	mRNA	100	65.3	108.73	96.38	86.97	19.79	24.57	55.34
Wnt16		NM_053116.3	NM_053116.3:75	Endogenous	mRNA	100	12.47	11.35	14.24	14.8	10.48	10.53	13.41
Wnt2		NM_023653.4	NM_023653.4:1335	Endogenous	mRNA	100	17.72	16.07	20.81	21.28	10.48	17.55	20.12
Wnt2b		NM_009520.3	NM_009520.3:1895	Endogenous	mRNA	100	7.57	8.51	6.57	8.33	10.48	8.19	3.35
Wnt3		NM_009521.2	NM_009521.2:1046	Endogenous	mRNA	100	15.78	11.35	39.43	20.35	11.64	3.51	8.38
Wnt3a		NM_009522.2	NM_009522.2:1279	Endogenous	mRNA	100	7.11	5.67	9.86	7.4	5.82	10.53	3.35
Wnt4		NM_009523.1	NM_009523.1:64	Endogenous	mRNA	100	7.47	2.84	13.14	8.33	6.99	9.36	4.19
Wnt5a		NM_009524.2	NM_009524.2:3020	Endogenous	mRNA	100	393.52	423.58	685.6	526.44	230.53	219.98	275
Wnt5b		NM_009525.3	NM_009525.3:1464	Endogenous	mRNA	100	74.16	59.57	44.9	77.72	90.82	83.08	88.87
Wnt6		NM_009526.3	NM_009526.3:1715	Endogenous	mRNA	100	33.42	37.82	50.38	49.96	16.3	23.4	22.64
Wnt7a		NM_009527.3	NM_009527.3:1965	Endogenous	mRNA	100	4.93	5.67	4.38	8.33	4.66	2.34	4.19
Wnt7b		NM_009528.2	NM_009528.2:1782	Endogenous	mRNA	100	18.66	17.02	19.71	23.13	18.63	17.55	15.93
Wt1		NM_144783.2	NM_144783.2:406	Endogenous	mRNA	100	16.41	15.13	16.43	14.8	22.12	19.89	10.06
Xpa		NM_011728.2	NM_011728.2:378	Endogenous	mRNA	100	163.61	166.41	169.76	136	211.9	174.35	123.25
Xpc		NM_009531.2	NM_009531.2:805	Endogenous	mRNA	100	13.51	12.29	17.52	14.8	10.48	11.7	14.25
Xrcc4		NM_028012.4	NM_028012.4:166	Endogenous	mRNA	100	123.1	137.1	111.71	107.32	123.42	118.18	140.85
Zak		NM_023057.5	NM_023057.5:976	Endogenous	mRNA	100	207.35	210.84	281.47	274.78	154.85	142.75	179.42
Zbtb16		NM_001033324.2	NM_001033324.2:4193	Endogenous	mRNA	100	63.17	44.44	49.28	33.31	107.12	114.67	30.18
Zbtb32		NM_021397.2	NM_021397.2:1108	Endogenous	mRNA	100	23.83	24.58	29.57	22.2	25.61	23.4	17.61
Zic2		NM_009574.3	NM_009574.3:1875	Endogenous	mRNA	100	2.78	2.84	1.1	5.55	2.33	2.34	2.52
Abcf1		NM_013854.1	NM_013854.1:875	Housekeeping	mRNA	100	224.79	221.24	233.28	210.02	196.77	225.83	261.59
Alas1		NM_020559.2	NM_020559.2:1034	Housekeeping	mRNA	100	92.28	118.19	73.38	112.87	81.5	88.93	78.81
Edc3		NM_153799.3	NM_153799.3:2570	Housekeeping	mRNA	100	94.72	83.2	110.62	93.44	109.44	81.91	89.71
Eef1g		NM_026007.4	NM_026007.4:338	Housekeeping	mRNA	100	3019.22	2776.9	3379.81	3206.73	3182.04	2698.27	2871.6
Eif2b4		NM_001127355.1	NM_001127355.1:1562	Housekeeping	mRNA	100	336.79	311.07	334.04	341.4	365.59	335.82	332.85
G6pdx		NM_008062.2	NM_008062.2:2030	Housekeeping	mRNA	100	452.74	519.07	514.75	455.2	335.32	470.38	421.73
Gusb		NM_010368.1	NM_010368.1:1735	Housekeeping	mRNA	100	724.82	733.7	712.98	721.65	607.77	807.37	765.48
Hdac3		NM_010411.2	NM_010411.2:144	Housekeeping	mRNA	100	477.71	446.27	390.99	395.06	590.3	496.13	547.49
Hprt		NM_013556.2	NM_013556.2:428	Housekeeping	mRNA	100	1801.28	1901.37	1758.9	1756.02	1952.54	1663.89	1774.94
Nubp1		NM_011955.2	NM_011955.2:284	Housekeeping	mRNA	100	140.21	123.86	123.76	128.6	158.35	164.98	141.69
Oaz1		NM_008753.4	NM_008753.4:809	Housekeeping	mRNA	100	4006.68	3996.57	3601.04	3865.47	4267.17	4132.82	4177.02
Polr1b		NM_009086.2	NM_009086.2:2795	Housekeeping	mRNA	100	81.55	73.75	102.95	97.15	75.68	81.91	57.85
Polr2a		NM_009089.2	NM_009089.2:2220	Housekeeping	mRNA	100	915.98	956.83	993.35	880.79	775.43	951.3	938.19
Ppia		NM_008907.1	NM_008907.1:390	Housekeeping	mRNA	100	4951.54	4177.16	4780.58	4726.83	6180.12	4580.97	5263.61
Rpl19		NM_009078.2	NM_009078.2:92	Housekeeping	mRNA	100	15367.3	14201.2	14488.5	14427.5	18345.9	15489.9	15250.9
Sap130		NM_172965.2	NM_172965.2:2182	Housekeeping	mRNA	100	169.56	177.75	192.76	163.76	117.59	180.2	185.29
Sdha		NM_023281.1	NM_023281.1:250	Housekeeping	mRNA	100	687.98	684.53	589.22	561.59	796.38	779.29	716.85
Sf3a3		NM_029157.3	NM_029157.3:40	Housekeeping	mRNA	100	331.09	335.65	327.47	346.02	348.13	285.51	343.75
Tbp		NM_013684.3	NM_013684.3:70	Housekeeping	mRNA	100	86.52	94.55	76.66	81.42	80.34	94.78	91.39
Tubb5		NM_011655.4	NM_011655.4:2260	Housekeeping	mRNA	100	547.8	589.98	590.32	690.2	507.64	428.26	480.42
NEG_A		ERCC_00096.1	ERCC_00096.1:230	Negative	SYSTEM	100	7.83	11	11	5	6	9	5
NEG_B		ERCC_00041.1	ERCC_00041.1:440	Negative	SYSTEM	100	4.5	5	3	8	4	4	3
NEG_C		ERCC_00019.1	ERCC_00019.1:140	Negative	SYSTEM	100	8.5	8	10	9	10	4	10
NEG_D		ERCC_00076.1	ERCC_00076.1:355	Negative	SYSTEM	100	7	8	6	12	8	2	6
NEG_E		ERCC_00098.1	ERCC_00098.1:785	Negative	SYSTEM	100	7.5	5	9	3	9	8	11
NEG_F		ERCC_00126.1	ERCC_00126.1:220	Negative	SYSTEM	100	9.33	12	6	11	6	10	11
NEG_G		ERCC_00144.1	ERCC_00144.1:15	Negative	SYSTEM	100	5.67	3	5	6	4	7	9
NEG_H		ERCC_00154.1	ERCC_00154.1:115	Negative	SYSTEM	100	5	5	6	7	2	7	3
POS_A		ERCC_00117.1	ERCC_00117.1:385	Positive	SYSTEM	100	15732	15693	16077	17065	17038	14405	14114
POS_B		ERCC_00112.1	ERCC_00112.1:695	Positive	SYSTEM	100	6420.5	6353	6425	7101	6884	5904	5856
POS_C		ERCC_00002.1	ERCC_00002.1:850	Positive	SYSTEM	100	2295.17	2419	2254	2386	2337	2253	2122
POS_D		ERCC_00092.1	ERCC_00092.1:540	Positive	SYSTEM	100	438.67	420	427	473	477	423	412
POS_E		ERCC_00035.1	ERCC_00035.1:485	Positive	SYSTEM	100	63	58	70	52	83	62	53
POS_F		ERCC_00034.1	ERCC_00034.1:195	Positive	SYSTEM	100	32.33	28	27	40	34	32	33
